# Supplementary material for: Dehydration of alcohols catalyzed by copper(ii) sulfate: type II dyotropic reactions and stepwise mechanisms
Source: Royal Society of Chemistry journal article supplement (doi:10.1039/d3ob02052e), 2024-01-01
Supplement: d3ob02052e1.pdf [file d3ob02052e1.pdf]

## Dehydration of alcohols catalyzed by copper (II) sulfate: type II dyotropic reactions and stepwise mechanisms

Jorge Sánchez-Quesada,<sup>a</sup> Carlos López-Cruz,<sup>a</sup> Abel de Cózar,<sup>b,c,d</sup> Ana Arrieta,<sup>b</sup> Iosune Arrastia,<sup>c</sup>  
Fernando P. Cossío<sup>b,c,\*</sup>

*a: International Flavours & Fragrances IFF Inc. Avda. Felipe Klein 2, Benicarló 12580, Castellón, Spain.*

*b: Department of Organic Chemistry I, Facultad de Química / Kimika Fakultatea, Universidad del País Vasco / Euskal Herriko Unibertsitatea (UPV/EHU), Manuel de Lardizabal 3, 20018, San Sebastián / Donostia, Spain.*

*c: Donostia International Physics Center (DIPC), Manuel de Lardizabal 4, 20018 Donostia / San Sebastián, Spain*

*d: IKERBASQUE, Basque Foundation for Science, Plaza Euskadi 5, 48009, Bilbao, Spain*

### Contents

| Item                                                                                                                                                                                                                                                                                                                                                            | Page      |
|-----------------------------------------------------------------------------------------------------------------------------------------------------------------------------------------------------------------------------------------------------------------------------------------------------------------------------------------------------------------|-----------|
| <b>Comparative studies of DFT functionals</b>                                                                                                                                                                                                                                                                                                                   | <b>S3</b> |
| <b>Supplementary Table1.</b> Relative Gibbs energies associated with the dehydration reaction of <b>1a</b> (see Fig. 1) using different functionals. Thermal corrections at 298.15K and 423.15K (in brackets) were computed at M06(PCM) level. 6-31G(d,p)&LanL2dz basis set was used in all cases                                                               | <b>S3</b> |
| <b>Supplementary Table2.</b> Total electronic energies (E, in a.u.) of stationary points associated with the dehydration reaction of <b>1a</b> computed using different functionals                                                                                                                                                                             | <b>S4</b> |
| <b>Regeneration of the catalyst</b>                                                                                                                                                                                                                                                                                                                             | <b>S5</b> |
| <b>Supplementary Scheme 1.</b> Reaction Gibbs energies (in kcal mol <sup>-1</sup> , computed at 298 K and 423 K (values between brackets)) associated with the water-alcohol exchange to close the catalytic cycle of ethane dehydration catalyzed by Cu(II) sulphate computed at UTPSS/(PCM)/6-31G(d,p)&LanL2dz//UM06(PCM)/6-31G(d,p)&LanL2dz level of theory. | <b>S5</b> |

|                                                                                                                                                                                                                                                                                                                                                                                                                                                                                                                                                          |            |
|----------------------------------------------------------------------------------------------------------------------------------------------------------------------------------------------------------------------------------------------------------------------------------------------------------------------------------------------------------------------------------------------------------------------------------------------------------------------------------------------------------------------------------------------------------|------------|
| <b>Exploration of additional mechanisms</b>                                                                                                                                                                                                                                                                                                                                                                                                                                                                                                              | <b>S6</b>  |
| <b>Supplementary Scheme 2.</b> Reaction Gibbs energies (in kcal mol <sup>-1</sup> , computed at 298 K and 423 K (values between brackets)) associated with the (A) intramolecular, or (B) intermolecular protonation of ethanol ( <b>1a</b> ) by Cu(II) sulphate complexes computed at UTPSS/(PCM)/6-31G(d,p)&LanL2dz//UM06(PCM)/6-31G(d,p)&LanL2dz level of theory.                                                                                                                                                                                     | <b>S6</b>  |
| <b>Additional explicit solvent molecules</b>                                                                                                                                                                                                                                                                                                                                                                                                                                                                                                             | <b>S7</b>  |
| <b>Supplementary Figure 1.</b> Energy profile and main geometrical features of transition structure associated with the dehydration reaction of alcohol <b>1a</b> catalyzed by CuSO <sub>4</sub> considering two explicit molecules of solvent (one additional MeOH compared to the profile collected in Fig.1) computed at the UTPSS/(PCM)/6-31G(d,p)&LanL2dz//UM06(PCM)/6-31G(d,p)&LanL2dz level of theory. Relative Gibbs energies, in kcal mol <sup>-1</sup> , were computed at 298.15 K and 423.15 K (values between brackets). Distances are in Å. | <b>S7</b>  |
| <b>Evaluation of INTb ion pair dissociation energy</b>                                                                                                                                                                                                                                                                                                                                                                                                                                                                                                   | <b>S8</b>  |
| <b>Supplementary Figure 2.</b> (A) Ion pair dissociation energy of <b>INTb</b> and (B) <b>INTb</b> relaxed energy profile scan computed at the UTPSS/(PCM)/6-31G(d,p)&LanL2dz//UM06(PCM)/6-31G(d,p)&LanL2dz level of theory.                                                                                                                                                                                                                                                                                                                             | <b>S8</b>  |
| <b>Supplementary Table3.</b> Calculated kinetic constants ( <i>k<sub>i</sub></i> , in s <sup>-1</sup> ) associated with the dehydration reaction of alcohols <b>1c</b> , <b>1e</b> and <b>1f</b> catalyzed by CuSO <sub>4</sub> .                                                                                                                                                                                                                                                                                                                        | <b>S9</b>  |
| <b>Supplementary Table4.</b> Total electronic energies (E, in a.u.), zero point correction of the energy (ZPE, in a.u.), thermal corrections to Gibbs energies (TCGFE, in a.u.), and number of imaginary frequencies (NIMAG) of all stationary points discussed in the main text computed at M06(PCM)/6-31G(d,p)&LanL2dz level.                                                                                                                                                                                                                          | <b>S10</b> |
| Cartesian coordinates of all the stationary points discussed in the main text and in the ESI                                                                                                                                                                                                                                                                                                                                                                                                                                                             | <b>S14</b> |

## Comparative study of DFT functionals

We observed that the computed activation free energy barriers when using M06(PCM) resulted in an overestimation of the reaction time associated with respect to the processes reported in literature. Therefore, we decided to perform a functional benchmarking using the dehydration of **1a** as model reaction. We performed single-point energy calculations using optimized geometries and thermochemistries computed at the M06(PCM)/6-31G(d,p)&LanL2dz level.

To this end, we selected different functionals, including Grimme's dispersion with Becke-Jonson damping (D3BJ)<sup>1</sup> and 6-31G(d,p)&LanL2dz basis set: denoted as B3LYP-D3BJ(PCM);<sup>2</sup> pure and hybrid Perdew, Burke and Ernzerhof functionals PBE-D3BJ(PCM) and PBE0-D3BJ(PCM);<sup>3</sup> non-local correlated B3PW91-D3BJ(PCM) and meta-GGA TPSS-D3BJ(PCM).<sup>4</sup> Additionally we also used Head-Gordon functional (including dispersion) wB97XD(PCM).

Our results show the suitability of TPSS-D3BJ meta-GGA functional, with an improved correlation term, in which the empirical gradient coefficient parameter D is set as 0 (compared to the D value of 0.113 assigned to other functionals). The obtained activation barriers by using the TPSS/(PCM)/6-31G(d,p)&LanL2dz//M06(PCM)/6-31G(d,p)&LanL2dz procedure provided more realistic reaction times, in line with the experimental evidences (see main manuscript).

**Supplementary Table 1.** Relative Gibbs energies associated with the dehydration reaction of **1a** (see Fig. 1) using different functionals. Thermal corrections at 298.15K and 423.15K (in brackets) were computed at M06(PCM) level. 6-31G(d,p)&LanL2dz basis set was used in all cases.

| Functional       | RCa         | TSa         | PCa         | 2a<br>+<br>CuSO <sub>4</sub> ·MeOH·H <sub>2</sub> O |
|------------------|-------------|-------------|-------------|-----------------------------------------------------|
| M06(PCM)         | -5.1 (-6.5) | 44.8 (43.6) | 25.2 (22.7) | -0.4 (1.7)                                          |
| B3LYP-D3BJ(PCM)  | -8.2 (-9.7) | 37.9 (36.6) | 20.6 (18.1) | -2.6 (-0.5)                                         |
| PBE-D3BJ(PCM)    | -6.8 (-8.3) | 33.9 (32.6) | 23.1 (20.7) | 0.2 (2.3)                                           |
| PBE0-D3BJ(PCM)   | -7.4 (-8.9) | 42.7 (41.4) | 26.2 (23.7) | 0.8 (2.9)                                           |
| B3PW91-D3BJ(PCM) | -7.0 (-8.5) | 40.5 (39.3) | 24.4 (21.9) | -0.1 (2.0)                                          |
| TPSS-D3BJ(PCM)   | -7.3 (-8.8) | 35.5 (34.2) | 24.2 (21.7) | 0-4 (2.6)                                           |
| wB97XD(PCM)      | -6.4 (-7.9) | 45.8 (44.5) | 25.1 (22.6) | -0.2 (1.9)                                          |

**Supplementary Table 2.** Total electronic energies (E, in a.u.) of stationary points associated with the dehydration reaction of **1a** computed using different functionals. (Values obtained with M06(PCM) and TPSS(PCM) are collected in Supplementary Table 4)

| Structure                                   | B3LYP-D3BJ(PCM) | PBE-D3BJ(PCM) | PBE0-D3BJ(PCM) |
|---------------------------------------------|-----------------|---------------|----------------|
| <b>CuSO<sub>4</sub>·MeOH</b>                | -1010.994055    | -1010.36481   | -1010.334315   |
| <b>CuSO<sub>4</sub>·MeOH·H<sub>2</sub>O</b> | -1087.458959    | -1086.741623  | -1086.716242   |
| <b>1a</b>                                   | -155.0617862    | -154.854775   | -154.8744132   |
| <b>RCa</b>                                  | -1166.09098     | -1165.252497  | -1165.242541   |
| <b>TS<sub>con</sub>a</b>                    | -1166.006299    | -1165.176321  | -1165.151484   |
| <b>PCa</b>                                  | -1166.037681    | -1165.197323  | -1165.181583   |
| <b>2a</b>                                   | -78.5997241     | -78.4762578   | -78.48987      |

| Structure                                   | B3PW91-D3BJ(PCM) | wB97XD(PCM)  |
|---------------------------------------------|------------------|--------------|
| <b>CuSO<sub>4</sub>·MeOH</b>                | -1010.829077     | -1010.828027 |
| <b>CuSO<sub>4</sub>·MeOH·H<sub>2</sub>O</b> | -1087.265064     | -1087.268835 |
| <b>1a</b>                                   | -155.0046688     | -155.0058321 |
| <b>RCa</b>                                  | -1165.866887     | -1165.866159 |
| <b>TS<sub>con</sub>a</b>                    | -1165.779933     | -1165.771723 |
| <b>PCa</b>                                  | -1165.809448     | -1165.808532 |
| <b>2a</b>                                   | -78.5674977      | -78.5640228  |

## Regeneration of the catalyst

In order to complete the catalytic cycle, we analyzed the recovery of the reactive complex **RCa** by water-ethanol exchange. Our calculations showed that this latter step is thermodynamically favored, ensuring that, after the dehydration of the first ethanol molecule, Cu(II) sulphate complex would continue reacting (Supplementary Scheme 1). Note that, since ethanol is used as solvent, the exchange equilibrium will be displaced to the right, further favoring **RCa** regeneration.

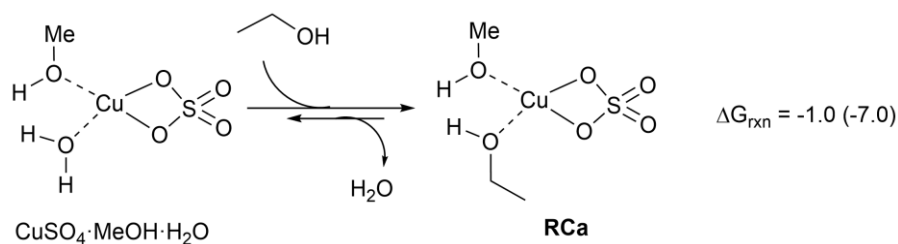

**Supplementary Scheme 1.** Reaction Gibbs energies (in kcal mol<sup>-1</sup>, computed at 298 K and 423 K (values between brackets)) associated with the water-alcohol exchange to close the catalytic cycle of ethane dehydration catalyzed by Cu(II) sulphate computed at UTPSS/(PCM)/6-31G(d,p)&LanL2dz//UM06(PCM)/6-31G(d,p)&LanL2dz level of theory.

## Exploration of additional mechanisms

The role of Cu(II) salts as Brønsted acids was explored. Within this framework, two different possibilities were considered: (A) Intramolecular protonation of ethanol (Supplementary Scheme 2A); and (B) protonation of a non coordinated ethanol molecule by  $\text{CuSO}_4 \cdot \text{MeOH} \cdot \text{H}_2\text{O}$  (Supplementary Scheme 2B). Our calculations showed that both processes are endergonic, especially at high temperatures. According the reaction Gibbs energy of the reaction, these equilibria should be displaced towards neutral complex **RCa**, and  $\text{CuSO}_4 \cdot \text{MeOH} \cdot \text{H}_2\text{O} + \text{ethanol}$ , respectively.

All our attempts to minimize a complex in which Cu(II) sulphate anion and protonated ethanol are stabilized by hydrogen bonding evolved towards neutral Cu(II) sulphate interacting with ethanol.

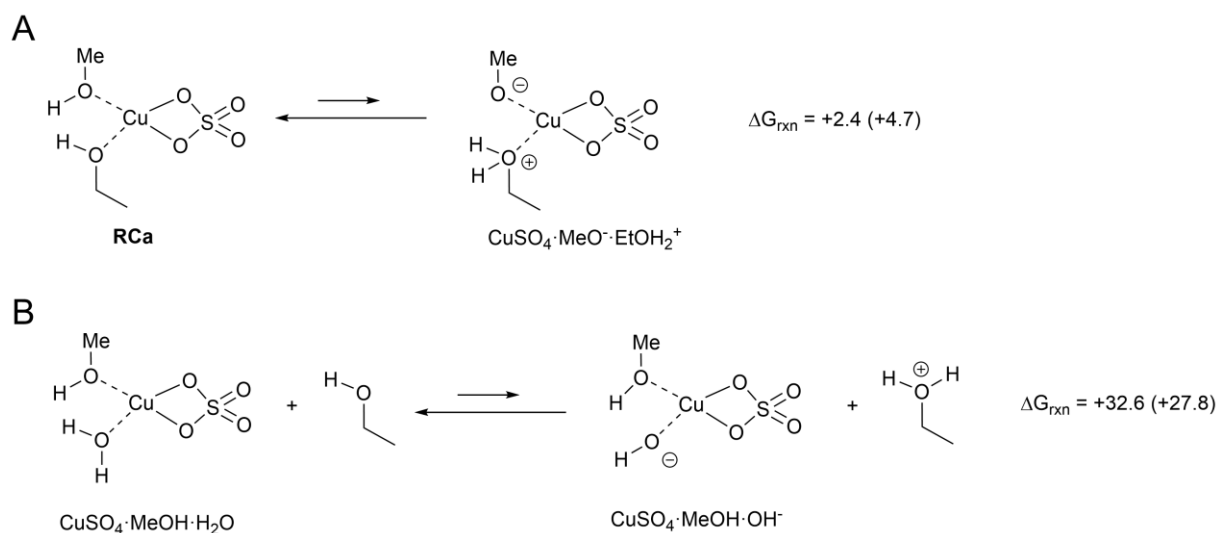

**Supplementary Scheme 2.** Reaction Gibbs energies (in kcal mol<sup>-1</sup>, computed at 298 K and 423 K (values between brackets)) associated with the (A) intramolecular, or (B) intermolecular protonation of ethanol (**1a**) by Cu(II) sulphate complexes computed at UTPSS/(PCM)/6-31G(d,p)&LanL2dz//UM06(PCM)/6-31G(d,p)&LanL2dz level of theory.

## Additional explicit solvent molecules

The effect of an additional solvent molecule on the energetic profile associated with the dehydration of **1a** was also explored. Our calculations show that the additional molecule of MeOH interacts with the OH moiety of the two alcohols (namely **1a** and MeOH) directly connected to Cu atom via hydrogen bonding interaction. Geometrical inspection of the computed transition structure **TS<sub>con</sub>a·MeOH** show that no significant modifications arises due to the presence of the additional explicit methanol molecules. In addition, the computed activation barrier associated with this step increases. Therefore, only one explicit model solvent molecule (i.e. the one directly coordinated to the copper atom) was considered.

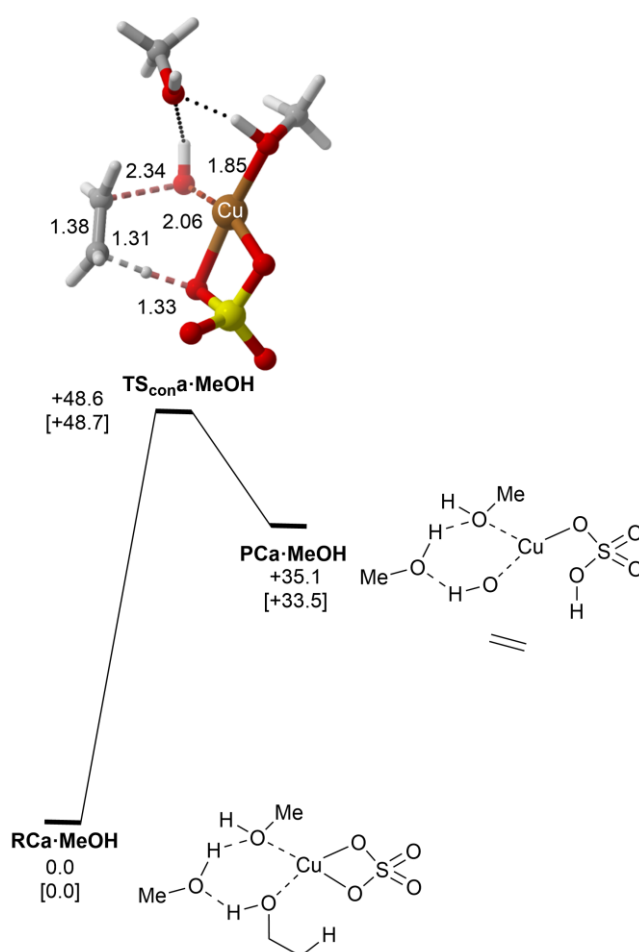

**Supplementary Figure 1.** Energy profile and main geometrical features of transition structure associated with the dehydration reaction of alcohol **1a** catalyzed by CuSO<sub>4</sub> considering two explicit molecules of solvent (one additional MeOH compared to the profile collected in Fig.1) computed at the UTPSS/(PCM)/6-31G(d,p)&LanL2dz//UM06(PCM)/6-31G(d,p)&LanL2dz level of theory. Relative Gibbs energies, in kcal mol<sup>-1</sup>, were computed at 298.15 K and 423.15 K (values between brackets). Distances are in Å.

## Evaluation of INTb ion pair dissociation energy

The ion pair dissociation energy of **INTb** has been computed by using two different approaches: (A) electronic energy difference between the complete molecule and the sum of the cationic and anionic fragments; (B) relaxed energy profile scan, in which the C-O bond was constantly stretched. Our calculations indicate that the attractive Coulombic interaction between the two opposite charged moieties is a strong interaction, even at long distances which avoids **INTb** dissociation.

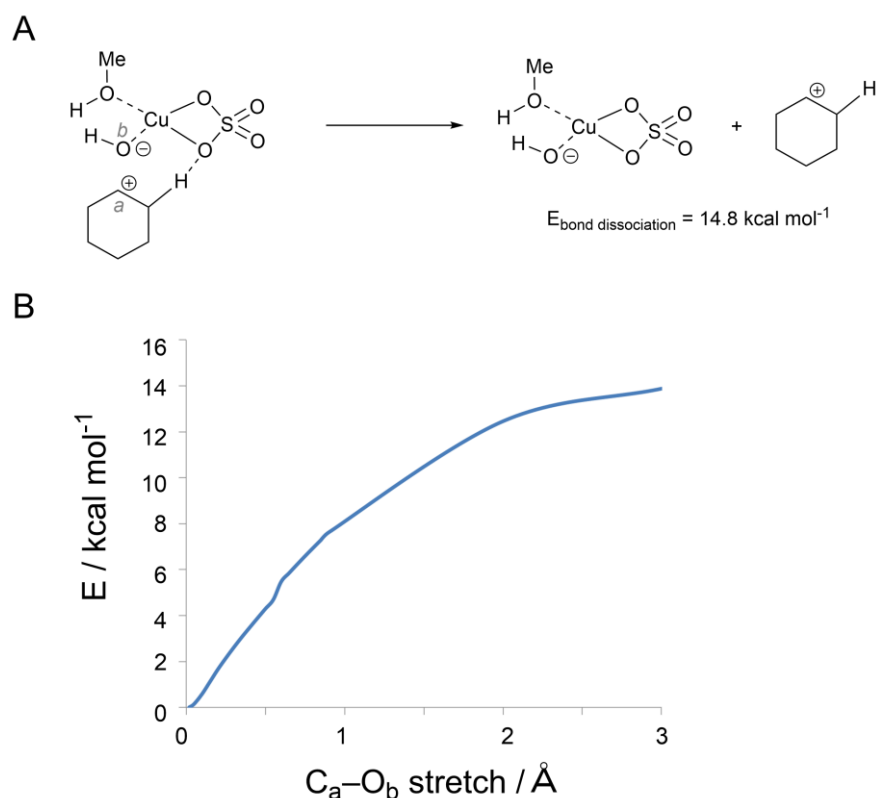

**Supplementary Figure 2.** (A) Ion pair dissociation energy of **INTb** and (B) **INTb** relaxed energy profile scan computed at the UTPSS/(PCM)/6-31G(d,p)&LanL2dz//UM06(PCM)/6-31G(d,p)&LanL2dz level of theory.



**Supplementary Table3.** Calculated kinetic constants<sup>a</sup> ( $k_i$ , in s<sup>-1</sup>) associated with the dehydration reaction of alcohols **1c**, **1e** and **1f** catalyzed by CuSO<sub>4</sub>.

| Reaction                                   | $k_i$                | $k_{-i}$             |
|--------------------------------------------|----------------------|----------------------|
| <b>RCc</b> --> <b>PCc</b> (dyotropic)      | 1.4 10 <sup>-6</sup> | -                    |
| <b>RCc</b> --> <b>INTc</b> (stepwise)      | 1.3 10 <sup>-5</sup> | 1.7 10 <sup>11</sup> |
| <b>INTc</b> --> <b>PCc</b>                 | 9.0 10 <sup>9</sup>  | -                    |
| <b>RCe(Sz)</b> --> <b>INTe(Sz)</b>         | 7.4 10 <sup>-3</sup> | 3.9 10 <sup>11</sup> |
| <b>INTe(Sz)</b> --> <b>PCe(Sz)</b>         | 1.9 10 <sup>12</sup> | -                    |
| <b>RCe(aS)</b> --> <b>INTe(aS)</b>         | 2.7 10 <sup>-4</sup> | 3.4 10 <sup>12</sup> |
| <b>INTe(aS)</b> --> <b>PCe(aS)</b>         | 1.4 10 <sup>12</sup> | -                    |
| <b>(Z)-RCf(Sz)</b> --> <b>(Z)-INTf(Sz)</b> | 2.8 10 <sup>-3</sup> | 9.6 10 <sup>10</sup> |
| <b>(Z)-INTf(Sz)</b> --> <b>(Z)-PCf(Sz)</b> | 1.2 10 <sup>12</sup> | -                    |
| <b>(E)-RCf(Sz)</b> --> <b>(E)-INTf(Sz)</b> | 4.9 10 <sup>-3</sup> | 1.7 10 <sup>11</sup> |
| <b>(E)-INTf(Sz)</b> --> <b>(E)-PCf(Sz)</b> | 4.3 10 <sup>12</sup> | -                    |
| <b>RCf(aS)</b> --> <b>INTf(aS)</b>         | 2.1 10 <sup>-3</sup> | 6.4 10 <sup>12</sup> |
| <b>INTf(aS)</b> --> <b>PCf(aS)</b>         | 6.5 10 <sup>11</sup> | -                    |

<sup>a</sup> Values computed using Eyring equation from Gibbs energy barriers computed at 423.15K at TPSS/(PCM)/6-31G(d,p)&LanL2dz // M06(PCM)/6-31G(d,p)&LanL2dz level.

**Supplementary Table 4.** Total electronic energies (E, in a.u.), zero point correction of the energy<sup>a,b</sup> (ZPE, in a.u.), thermal corrections to Gibbs energies<sup>c</sup> (TCGE, in a.u.), and number of imaginary frequencies<sup>d</sup> (NIMAG) of all stationary points discussed in the main text.

| Structure                                                | E                                                        | ZPE                    | TCGE                   | NIMAG(v)          |
|----------------------------------------------------------|----------------------------------------------------------|------------------------|------------------------|-------------------|
| <b>CuSO<sub>4</sub>·MeOH</b>                             | -1010.787124 <sup>a</sup><br>(-1010.974378) <sup>b</sup> | 0.071628<br>(0.063953) | 0.034075<br>(0.012580) | 0                 |
| <b>CuSO<sub>4</sub>·MeOH·H<sub>2</sub>O</b>              | -1087.216180 <sup>a</sup><br>(-1087.437910) <sup>b</sup> | 0.097975<br>(0.087478) | 0.058549<br>(0.034920) | 0                 |
| <b>H<sub>2</sub>O</b>                                    | -76.398661 <sup>a</sup><br>(-76.4329934) <sup>b</sup>    | 0.021564<br>(0.021564) | 0.003911<br>(0.005360) | 0                 |
| <b>CuSO<sub>4</sub>·MeO·EtOH<sub>2</sub><sup>+</sup></b> | -1165.709033 <sup>a</sup><br>(-1166.026017) <sup>b</sup> | 0.154294<br>(0.154294) | 0.110249<br>(0.083166) | 0                 |
| <b>CuSO<sub>4</sub>·MeOH·OH<sup>-</sup></b>              | -1086.745825 <sup>a</sup><br>(-1166.026017) <sup>b</sup> | 0.084762<br>(0.084762) | 0.044880<br>(0.021184) | 0                 |
| <b>EtOH<sub>2</sub><sup>+</sup></b>                      | -155.3715289 <sup>a</sup><br>(-155.502967) <sup>b</sup>  | 0.093705<br>(0.093705) | 0.068226<br>(0.054667) | 0                 |
| <b>1a</b>                                                | -154.950318 <sup>a</sup><br>(-155.074838) <sup>b</sup>   | 0.079595<br>(0.071067) | 0.054208<br>(0.031795) | 0                 |
| <b>RCa</b>                                               | -1165.76756 <sup>a</sup><br>(-1166.082813) <sup>b</sup>  | 0.154414<br>(0.137869) | 0.110302<br>(0.064012) | 0                 |
| <b>TS<sub>con</sub>a</b>                                 | -1165.676765 <sup>a</sup><br>(-1166.003504) <sup>b</sup> | 0.144033<br>(0.128601) | 0.099086<br>(0.053163) | 1<br>(-1580.1703) |
| <b>PCa</b>                                               | -1165.711958 <sup>a</sup><br>(-1166.025272) <sup>b</sup> | 0.149388<br>(0.133382) | 0.102915<br>(0.055028) | 0                 |
| <b>2a</b>                                                | -78.520539 <sup>a</sup><br>(-78.609210) <sup>b</sup>     | 0.050566<br>(0.045148) | 0.028379<br>(0.011457) | 0                 |
| <b>RCa·MeOH</b>                                          | -1281.449033 <sup>a</sup><br>(-1281.852786) <sup>b</sup> | 0.208861<br>(0.208861) | 0.159918<br>(0.128683) | 0                 |
| <b>TS<sub>con</sub>a·MeOH</b>                            | -1281.352578 <sup>a</sup><br>(-1281.766584) <sup>b</sup> | 0.199244<br>(0.199244) | 0.151140<br>(0.120088) | 1<br>(-1561.5781) |
| <b>PCa·MeOH</b>                                          | -1281.385693 <sup>a</sup><br>(-1281.787260) <sup>b</sup> | 0.202905<br>(0.202905) | 0.150352<br>(0.116496) | 0                 |
| <b>1b</b>                                                | -310.893873 <sup>a</sup><br>(-311.179497) <sup>b</sup>   | 0.173446<br>(0.154862) | 0.143011<br>(0.105949) | 0                 |
| <b>RCb</b>                                               | -1321.706973 <sup>a</sup><br>(-1322.188340) <sup>b</sup> | 0.248623<br>(0.221985) | 0.201971<br>(0.142090) | 0                 |
| <b>TS1b</b>                                              | -1321.636293 <sup>a</sup><br>(-1322.118429) <sup>b</sup> | 0.240349<br>(0.214597) | 0.192004<br>(0.131548) | 1<br>(-573.6477)  |
| <b>INTb</b>                                              | -1321.636592 <sup>a</sup><br>(-1322.118299) <sup>b</sup> | 0.241067<br>(0.215239) | 0.192057<br>(0.13080)  | 0                 |
| <b>TS2b</b>                                              | -1321.632629 <sup>a</sup><br>(-1322.113700) <sup>b</sup> | 0.237227<br>(0.21181)  | 0.188367<br>(0.127811) | 1<br>(-941.8871)  |
| <b>PCb</b>                                               | -1321.655483 <sup>a</sup><br>(-1322.138485) <sup>b</sup> | 0.242959<br>(0.216928) | 0.192646<br>(0.130462) | 0                 |
| <b>2b</b>                                                | -234.4659392 <sup>a</sup><br>(-234.717190) <sup>b</sup>  | 0.145126<br>(0.129577) | 0.116529<br>(0.084434) | 0                 |
| <b>1c</b>                                                | -385.835600 <sup>a</sup><br>(-386.199464) <sup>b</sup>   | 0.160635<br>(0.143424) | 0.127348<br>(0.089425) | 0                 |

|                               |                                                           |                        |                        |                   |
|-------------------------------|-----------------------------------------------------------|------------------------|------------------------|-------------------|
| <b>RCc</b>                    | -1396.650813 <sup>a</sup><br>(-1397.213505) <sup>b</sup>  | 0.234902<br>(0.209734) | 0.184656<br>(0.123534) | 0                 |
| <b>TS<sub>con</sub>c</b>      | -1396.579274 <sup>a</sup><br>(-1397.148929) <sup>b</sup>  | 0.225724<br>(0.201539) | 0.1769<br>(0.116982)   | 1<br>(-1659.6776) |
| <b>PCc</b>                    | -1396.604129 <sup>a</sup><br>(-1397.165272) <sup>b</sup>  | 0.230723<br>(0.206003) | 0.180495<br>(0.116982) | 0                 |
| <b>TS1c</b>                   | -1396.589750 <sup>a</sup><br>(-1397.153602+) <sup>b</sup> | 0.230682<br>(0.205966) | 0.17989<br>(0.118835)  | 1<br>(-62.6801)   |
| <b>INTc</b>                   | -1396.594716 <sup>a</sup><br>(-1397.156875) <sup>b</sup>  | 0.230197<br>(0.205533) | 0.178808<br>(0.118558) | 0                 |
| <b>TS2c</b>                   | -1396.576098 <sup>a</sup><br>(-1397.146558) <sup>b</sup>  | 0.22552<br>(0.201357)  | 0.175826<br>(0.115515) | 1<br>(-1700.87)   |
| <b>2c</b>                     | -309.409597 <sup>a</sup><br>(-309.738849) <sup>b</sup>    | 0.132544<br>(0.118343) | 0.100721<br>(0.067615) | 0                 |
| <b>CuSO<sub>4</sub>-anion</b> | -1086.966033 <sup>b</sup>                                 | -                      | -                      | -                 |
| <b>Cyclohexane-cation</b>     | -235.1286425 <sup>b</sup>                                 | -                      | -                      | -                 |
| <b>1d</b>                     | -425.123859 <sup>a</sup><br>(-425.529288) <sup>b</sup>    | 0.188573<br>(0.168369) | 0.154322<br>(0.111985) | 0                 |
| <b>RCd</b>                    | -1435.937146 <sup>a</sup><br>(-1436.541848) <sup>b</sup>  | 0.262534<br>(0.234406) | 0.21233<br>(0.147165)  | 0                 |
| <b>TS1d</b>                   | -1435.890215 <sup>a</sup><br>(-1436.495587) <sup>b</sup>  | 0.258125<br>(0.230469) | 0.205681<br>(0.139433) | 1<br>(-70.4167)   |
| <b>INTd</b>                   | -1435.891918 <sup>a</sup><br>(-1436.497372) <sup>b</sup>  | 0.258542<br>(0.230841) | 0.207375<br>(0.141376) | 0                 |
| <b>TS2d</b>                   | -1435.87332 <sup>a</sup><br>(-1436.486200) <sup>b</sup>   | 0.253926<br>(0.22672)  | 0.203633<br>(0.139076) | 1<br>(-1635.0868) |
| <b>PCd</b>                    | -1435.888553 <sup>a</sup><br>(-1436.494895) <sup>b</sup>  | 0.258585<br>(0.23088)  | 0.206041<br>(0.139274) | 0                 |
| <b>2d</b>                     | -348.696783 <sup>a</sup><br>(-349.067870) <sup>b</sup>    | 0.160731<br>(0.14351)  | 0.127991<br>(0.090482) | 0                 |
| <b>1e</b>                     | -351.3796377 <sup>a</sup><br>(-351.712521) <sup>b</sup>   | 0.219885<br>(0.196326) | 0.184696<br>(0.163465) | 0                 |
| <b>RCe-<i>aS</i></b>          | -1362.193722 <sup>a</sup><br>(-1362.72221) <sup>b</sup>   | 0.294386<br>(0.262845) | 0.24238<br>(0.208149)  | 0                 |
| <b>TS1e-<i>aS</i></b>         | -1362.137258 <sup>a</sup><br>(-1362.664579) <sup>b</sup>  | 0.288411<br>(0.257510) | 0.236153<br>(0.201446) | 1<br>(-74.9467)   |
| <b>INTe-<i>aS</i></b>         | -1362.138036 <sup>a</sup><br>(-1362.665617) <sup>b</sup>  | 0.287199<br>(0.256427) | 0.231869<br>(0.201126) | 0                 |
| <b>TS2e-<i>aS</i></b>         | -1362.125613 <sup>a</sup><br>(1362.661275) <sup>b</sup>   | 0.285206<br>(0.254648) | 0.233623<br>(0.19926)  | 1<br>(-1529.0935) |
| <b>PCe-<i>aS</i></b>          | -1362.136051 <sup>a</sup><br>(-1362.668177) <sup>b</sup>  | 0.290688<br>(0.259543) | 0.236342<br>(0.200431) | 0                 |
| <b>2e-<i>aS</i></b>           | -274.9479679 <sup>a</sup><br>(-275.247489) <sup>b</sup>   | 0.191837<br>(0.171283) | 0.157676<br>(0.137667) | 0                 |
| <b>RCe-<i>Sz</i></b>          | -1362.193947 <sup>a</sup><br>(-1362.722700)               | 0.295351<br>(0.263706) | 0.246615<br>(0.213996) | 0                 |

|                    |                                                          |                        |                        |                   |
|--------------------|----------------------------------------------------------|------------------------|------------------------|-------------------|
| <b>TS1e-Sz</b>     | -1362.134549 <sup>a</sup><br>(-1362.661716) <sup>b</sup> | 0.287638<br>(0.256819) | 0.234644<br>(0.199514) | 1<br>(-39.7485)   |
| <b>INTe-Sz</b>     | -1362.134786 <sup>a</sup><br>(-1362.664140) <sup>b</sup> | 0.287824<br>(0.256986) | 0.233658<br>(0.19769)  | 0                 |
| <b>TS2e-Sz</b>     | -1362.123118 <sup>a</sup><br>(-1362.659580) <sup>b</sup> | 0.284068<br>(0.253632) | 0.230704<br>(0.195326) | 1<br>(-1489.8149) |
| <b>PCe-Sz</b>      | -1362.142223 <sup>a</sup><br>(-1362.674481) <sup>b</sup> | 0.290766<br>(0.259613) | 0.238429<br>(0.203392) | 0                 |
| <b>2e-Sz</b>       | -274.951225 <sup>a</sup><br>(-275.251736) <sup>b</sup>   | 0.191463<br>(0.170949) | 0.156836<br>(0.136498) | 0                 |
| <b>1f</b>          | -465.520227 <sup>a</sup><br>(-465.965297) <sup>b</sup>   | 0.23374<br>(0.208697)  | 0.193886<br>(0.16896)  | 0                 |
| <b>RCf-aS</b>      | -1476.326387 <sup>a</sup><br>(-1476.970478) <sup>b</sup> | 0.308147<br>(0.275131) | 0.251513<br>(0.21354)  | 0                 |
| <b>TS1f-aS</b>     | -1476.269303 <sup>a</sup><br>(-1476.919222) <sup>b</sup> | 0.303003<br>(0.250538) | 0.245869<br>(0.207407) | 1<br>(-104.4025)  |
| <b>INTf-aS</b>     | -1476.269665 <sup>a</sup><br>(-1476.918667) <sup>b</sup> | 0.303542<br>(0.271020) | 0.245687<br>(0.206544) | 0                 |
| <b>TS2f-aS</b>     | -1476.25508 <sup>a</sup><br>(-1476.910377) <sup>b</sup>  | 0.298818<br>(0.266802) | 0.240735<br>(0.201395) | 1<br>(-1635.1228) |
| <b>PCf-aS</b>      | -1476.289667 <sup>a</sup><br>(-1476.936253) <sup>b</sup> | 0.304739<br>(0.272088) | 0.304739<br>(0.210181) | 0                 |
| <b>2f-aS</b>       | -389.095955 <sup>a</sup><br>(-389.508221) <sup>b</sup>   | 0.206218<br>(0.184123) | 0.16744<br>(0.143879)  | 0                 |
| <b>(E)-RCf-Sz</b>  | -1476.326606 <sup>a</sup><br>(-1476.971287) <sup>b</sup> | 0.309646<br>(0.276470) | 0.256576<br>(0.220541) | 0                 |
| <b>(E)-TS1e-Sz</b> | -1476.265299 <sup>a</sup><br>(-1476.913589) <sup>b</sup> | 0.302644<br>(0.270217) | 0.245382<br>(0.206849) | 1<br>(-42.1017)   |
| <b>(E)-INTe-Sz</b> | -1476.26467 <sup>a</sup><br>(-1476.914225) <sup>b</sup>  | 0.302737<br>(0.270301) | 0.242708<br>(0.202495) | 0                 |
| <b>(E)-TS2e-Sz</b> | -1476.257411 <sup>a</sup><br>(-1476.912985) <sup>b</sup> | 0.298309<br>(0.266347) | 0.24097<br>(0.202206)  | 1<br>(-1131.0359) |
| <b>(E)-PCe-Sz</b>  | -1476.295513 <sup>a</sup><br>(-1476.943065) <sup>b</sup> | 0.304107<br>(0.271524) | 0.246291<br>(0.207081) | 0                 |
| <b>(E)-2e-Sz</b>   | -389.098885 <sup>a</sup><br>(-389.511970) <sup>b</sup>   | 0.205817<br>(0.183765) | 0.166609<br>(0.14271)  | 0                 |
| <b>(Z)-RCf-Sz</b>  | -1476.32576 <sup>a</sup><br>(-1476.970526) <sup>b</sup>  | 0.308632<br>(0.275564) | 0.25253<br>(0.220541)  | 0                 |
| <b>(Z)-TS1e-Sz</b> | -1476.268776 <sup>a</sup><br>(-1476.915700) <sup>b</sup> | 0.302606<br>(0.270184) | 0.245561<br>(0.206849) | 1<br>(-63.0919)   |
| <b>(Z)-INTe-Sz</b> | -1476.268981 <sup>a</sup><br>(-1476.918204) <sup>b</sup> | 0.302096<br>(0.269729) | 0.243156<br>(0.202495) | 0                 |
| <b>(Z)-TS2e-Sz</b> | -1476.256051 <sup>a</sup><br>(-1476.910799) <sup>b</sup> | 0.297831<br>(0.265920) | 0.240571<br>(0.202206) | 1<br>(-1432.8115) |
| <b>(Z)-PCe-Sz</b>  | -1476.295067 <sup>a</sup><br>(-1476.942609) <sup>b</sup> | 0.303606<br>(0.271077) | 0.245148<br>(0.207081) | 0                 |
| <b>(Z)-2e-Sz</b>   | -389.1008906 <sup>a</sup><br>(-389.514013) <sup>b</sup>  | 0.205676<br>(0.183640) | 0.166336<br>(0.14271)  | 0                 |

<sup>a</sup> Computed at M06(PCM)/6-31G(d,p)&LanL2dz level. <sup>b</sup> Computed at TPSSTPSS/(PCM)/6-31G(d,p)//M06(PCM)/6-31G(d,p)&LanL2dz level. <sup>c</sup> Thermal corrections computed at 298.15 K (and 423.15K between brackets) at M06(PCM)/6-31G(d,p)&LanL2dz level. <sup>d</sup> If NIMAG=1, the imaginary frequency  $\nu$  (in parentheses) is given in  $\text{cm}^{-1}$ .

Cartesian coordinates of all the stationary points discussed in the main text and in the ESI

### **CuSO<sub>4</sub>·MeOH**

| Center Number | Atomic Number | Atomic Type | Coordinates (Angstroms) |           |           |
|---------------|---------------|-------------|-------------------------|-----------|-----------|
|               |               |             | X                       | Y         | Z         |
| 1             | 29            | 0           | 0.805487                | -0.631615 | -0.107425 |
| 2             | 8             | 0           | -0.318373               | 0.902055  | 0.464473  |
| 3             | 16            | 0           | -1.635219               | 0.207995  | 0.032867  |
| 4             | 8             | 0           | -2.286615               | 0.940302  | -1.055344 |
| 5             | 8             | 0           | 2.668443                | -0.197536 | 0.170149  |
| 6             | 6             | 0           | 2.998620                | 1.189541  | -0.044712 |
| 7             | 8             | 0           | -0.994568               | -1.111458 | -0.499010 |
| 8             | 8             | 0           | -2.492749               | -0.065912 | 1.188103  |
| 9             | 1             | 0           | 2.974436                | -0.465674 | 1.048875  |
| 10            | 1             | 0           | 4.083878                | 1.307009  | -0.022990 |
| 11            | 1             | 0           | 2.614592                | 1.451636  | -1.031432 |
| 12            | 1             | 0           | 2.530661                | 1.819092  | 0.716313  |

### **CuSO<sub>4</sub>·MeOH·H<sub>2</sub>O**

| Center Number | Atomic Number | Atomic Type | Coordinates (Angstroms) |           |           |
|---------------|---------------|-------------|-------------------------|-----------|-----------|
|               |               |             | X                       | Y         | Z         |
| 1             | 6             | 0           | -2.366645               | -2.079022 | -0.047725 |
| 2             | 8             | 0           | -2.435725               | -0.645262 | -0.013534 |
| 3             | 29            | 0           | -0.730531               | 0.384390  | 0.016800  |
| 4             | 8             | 0           | 1.054003                | 1.189239  | -0.003568 |
| 5             | 16            | 0           | 1.801754                | -0.169226 | -0.003367 |
| 6             | 8             | 0           | 2.596735                | -0.327481 | 1.219578  |
| 7             | 8             | 0           | 0.560636                | -1.097515 | 0.021482  |
| 8             | 8             | 0           | 2.561943                | -0.346624 | -1.245744 |
| 9             | 1             | 0           | -2.985059               | -0.372726 | 0.735556  |
| 10            | 1             | 0           | -3.375998               | -2.486255 | -0.141258 |
| 11            | 1             | 0           | -1.779079               | -2.346822 | -0.926116 |
| 12            | 1             | 0           | -1.882656               | -2.470837 | 0.851223  |
| 13            | 8             | 0           | -1.818688               | 2.069824  | 0.032995  |
| 14            | 1             | 0           | -1.235270               | 2.842470  | 0.027121  |
| 15            | 1             | 0           | -2.335968               | 2.131148  | -0.783159 |

### **H<sub>2</sub>O**

| Center Number | Atomic Number | Atomic Type | Coordinates (Angstroms) |           |           |
|---------------|---------------|-------------|-------------------------|-----------|-----------|
|               |               |             | X                       | Y         | Z         |
| 1             | 8             | 0           | 0.000000                | 0.000000  | 0.119662  |
| 2             | 1             | 0           | -0.000000               | 0.754844  | -0.478649 |
| 3             | 1             | 0           | -0.000000               | -0.754844 | -0.478649 |

### **CuSO<sub>4</sub>·MeO·EtOH<sub>2</sub><sup>+</sup>**

| Center Number | Atomic Number | Atomic Type | Coordinates (Angstroms) |           |           |
|---------------|---------------|-------------|-------------------------|-----------|-----------|
|               |               |             | X                       | Y         | Z         |
| 1             | 6             | 0           | -1.219258               | -2.196085 | 1.368277  |
| 2             | 6             | 0           | -1.220255               | -2.678983 | -0.045409 |
| 3             | 8             | 0           | -1.851389               | -1.603485 | -0.903577 |
| 4             | 29            | 0           | -0.541245               | 0.669495  | -0.445043 |

|    |    |   |           |           |           |
|----|----|---|-----------|-----------|-----------|
| 5  | 8  | 0 | 1.032827  | -0.232961 | -1.168586 |
| 6  | 16 | 0 | 1.930249  | 0.021767  | 0.067597  |
| 7  | 8  | 0 | 3.111104  | 0.815595  | -0.307654 |
| 8  | 8  | 0 | 0.959775  | 0.850295  | 0.931084  |
| 9  | 8  | 0 | -2.079371 | 1.445285  | 0.078062  |
| 10 | 6  | 0 | -1.978364 | 2.680854  | 0.715305  |
| 11 | 8  | 0 | 2.259633  | -1.252296 | 0.729865  |
| 12 | 1  | 0 | -2.232021 | -1.985620 | 1.727211  |
| 13 | 1  | 0 | -0.590506 | -1.307610 | 1.491892  |
| 14 | 1  | 0 | -1.806668 | -3.582359 | -0.214518 |
| 15 | 1  | 0 | -0.223010 | -2.777235 | -0.475567 |
| 16 | 1  | 0 | -0.802887 | -2.994780 | 1.989962  |
| 17 | 1  | 0 | -2.983223 | 3.043598  | 0.988198  |
| 18 | 1  | 0 | -1.401993 | 2.617156  | 1.656052  |
| 19 | 1  | 0 | -1.509161 | 3.458040  | 0.087442  |
| 20 | 1  | 0 | -1.804407 | -1.813105 | -1.857431 |
| 21 | 1  | 0 | -2.787376 | -1.435883 | -0.671158 |

### CuSO<sub>4</sub>·MeOH·OH<sup>-</sup>

| Center Number | Atomic Number | Atomic Type | Coordinates (Angstroms) |           |           |
|---------------|---------------|-------------|-------------------------|-----------|-----------|
|               |               |             | X                       | Y         | Z         |
| 1             | 6             | 0           | 2.415377                | -2.021446 | -0.057189 |
| 2             | 8             | 0           | 2.489639                | -0.605004 | 0.143693  |
| 3             | 29            | 0           | 0.762210                | 0.487215  | 0.017405  |
| 4             | 8             | 0           | 1.652279                | 2.096625  | -0.107267 |
| 5             | 8             | 0           | -1.157563               | 1.213144  | -0.046804 |
| 6             | 16            | 0           | -1.776090               | -0.192290 | -0.002374 |
| 7             | 8             | 0           | -2.562254               | -0.385047 | 1.229535  |
| 8             | 8             | 0           | -0.491359               | -1.046447 | 0.039150  |
| 9             | 8             | 0           | -2.542799               | -0.470146 | -1.230138 |
| 10            | 1             | 0           | 3.098646                | -0.226394 | -0.505593 |
| 11            | 1             | 0           | 3.415079                | -2.456846 | 0.018738  |
| 12            | 1             | 0           | 1.782408                | -2.422857 | 0.734995  |
| 13            | 1             | 0           | 1.974973                | -2.261804 | -1.029815 |
| 14            | 1             | 0           | 2.446443                | 2.019007  | 0.432691  |

### EtOH<sub>2</sub><sup>+</sup>

| Center Number | Atomic Number | Atomic Type | Coordinates (Angstroms) |           |           |
|---------------|---------------|-------------|-------------------------|-----------|-----------|
|               |               |             | X                       | Y         | Z         |
| 1             | 6             | 0           | -1.263177               | -0.259416 | -0.026643 |
| 2             | 6             | 0           | -0.044054               | 0.601716  | 0.054950  |
| 3             | 8             | 0           | 1.159065                | -0.290848 | -0.098015 |
| 4             | 1             | 0           | -1.305721               | -0.796803 | -0.977400 |
| 5             | 1             | 0           | 1.998442                | 0.208939  | -0.083098 |
| 6             | 1             | 0           | -2.139535               | 0.391001  | 0.041608  |
| 7             | 1             | 0           | 0.072838                | 1.119194  | 1.007327  |
| 8             | 1             | 0           | 0.057370                | 1.296949  | -0.776948 |
| 9             | 1             | 0           | -1.312708               | -0.974336 | 0.800702  |
| 10            | 1             | 0           | 1.200181                | -0.971954 | 0.602084  |

### 1a

| Center Number | Atomic Number | Atomic Type | Coordinates (Angstroms) |           |           |
|---------------|---------------|-------------|-------------------------|-----------|-----------|
|               |               |             | X                       | Y         | Z         |
| 1             | 6             | 0           | 0.084039                | 0.544050  | 0.000053  |
| 2             | 8             | 0           | 1.147154                | -0.397763 | 0.000126  |
| 3             | 6             | 0           | -1.215773               | -0.220115 | -0.000086 |
| 4             | 1             | 0           | -1.287781               | -0.857934 | -0.888069 |
| 5             | 1             | 0           | 1.975775                | 0.095186  | -0.000892 |
| 6             | 1             | 0           | -2.067970               | 0.466437  | 0.000792  |

|   |   |   |           |           |           |
|---|---|---|-----------|-----------|-----------|
| 7 | 1 | 0 | 0.140045  | 1.196912  | 0.885287  |
| 8 | 1 | 0 | 0.140416  | 1.197285  | -0.884874 |
| 9 | 1 | 0 | -1.287314 | -0.859394 | 0.886946  |

## RCa

| Center Number | Atomic Number | Atomic Type | Coordinates (Angstroms) |           |           |
|---------------|---------------|-------------|-------------------------|-----------|-----------|
|               |               |             | X                       | Y         | Z         |
| 1             | 6             | 0           | -2.441994               | 1.793807  | 0.469375  |
| 2             | 6             | 0           | -2.470517               | 2.222136  | -0.972563 |
| 3             | 8             | 0           | -2.229104               | 0.368424  | 0.602014  |
| 4             | 29            | 0           | -0.444853               | -0.389139 | 0.157924  |
| 5             | 8             | 0           | -1.332537               | -2.176197 | -0.070253 |
| 6             | 6             | 0           | -0.521351               | -3.307163 | -0.427021 |
| 7             | 16            | 0           | 1.987775                | 0.513681  | -0.015155 |
| 8             | 8             | 0           | 2.893584                | 0.610260  | 1.135246  |
| 9             | 8             | 0           | 0.653560                | 1.247075  | 0.268563  |
| 10            | 8             | 0           | 1.419925                | -0.922194 | -0.151651 |
| 11            | 8             | 0           | 2.573076                | 0.964945  | -1.283069 |
| 12            | 1             | 0           | -3.288029               | 1.732505  | -1.514183 |
| 13            | 1             | 0           | -2.919087               | -0.099152 | 0.107069  |
| 14            | 1             | 0           | -1.524510               | 1.981099  | -1.469760 |
| 15            | 1             | 0           | -3.376760               | 2.034755  | 0.987193  |
| 16            | 1             | 0           | -1.616534               | 2.255313  | 1.016930  |
| 17            | 1             | 0           | -2.625049               | 3.303789  | -1.037872 |
| 18            | 1             | 0           | -1.820192               | -2.384926 | 0.739937  |
| 19            | 1             | 0           | -1.165715               | -4.171871 | -0.602171 |
| 20            | 1             | 0           | 0.000819                | -3.044733 | -1.347328 |
| 21            | 1             | 0           | 0.206517                | -3.531821 | 0.357322  |

## TS<sub>cona</sub>

| Center Number | Atomic Number | Atomic Type | Coordinates (Angstroms) |           |           |
|---------------|---------------|-------------|-------------------------|-----------|-----------|
|               |               |             | X                       | Y         | Z         |
| 1             | 6             | 0           | -0.494800               | 2.963846  | 0.594496  |
| 2             | 6             | 0           | 0.859071                | 2.723911  | 0.717551  |
| 3             | 8             | 0           | -1.632891               | 1.489413  | -0.864117 |
| 4             | 29            | 0           | -0.794613               | -0.105499 | -0.410497 |
| 5             | 16            | 0           | 1.756653                | -0.726619 | 0.027209  |
| 6             | 8             | 0           | 2.619317                | -1.437142 | -0.915574 |
| 7             | 8             | 0           | 1.133762                | 0.537617  | -0.722164 |
| 8             | 8             | 0           | 0.459224                | -1.486913 | 0.304826  |
| 9             | 8             | 0           | 2.405226                | -0.277250 | 1.259935  |
| 10            | 1             | 0           | 1.011350                | 1.654446  | -0.004029 |
| 11            | 1             | 0           | -1.184068               | 1.814585  | -1.656062 |
| 12            | 1             | 0           | 1.205774                | 2.300312  | 1.662098  |
| 13            | 1             | 0           | -0.889317               | 3.676188  | -0.122793 |
| 14            | 1             | 0           | -1.210388               | 2.549126  | 1.297524  |
| 15            | 1             | 0           | 1.540949                | 3.406153  | 0.209330  |
| 16            | 8             | 0           | -2.541394               | -1.062602 | -0.128129 |
| 17            | 1             | 0           | -3.223109               | -0.375690 | -0.173603 |
| 18            | 6             | 0           | -2.664396               | -1.777526 | 1.110740  |
| 19            | 1             | 0           | -3.656550               | -2.230601 | 1.175327  |
| 20            | 1             | 0           | -1.905255               | -2.560223 | 1.100380  |
| 21            | 1             | 0           | -2.497271               | -1.115293 | 1.965951  |

## PCa

| Center | Atomic | Atomic | Coordinates (Angstroms) |  |  |
|--------|--------|--------|-------------------------|--|--|
|--------|--------|--------|-------------------------|--|--|



| Number | Number | Type | X         | Y         | Z         |
|--------|--------|------|-----------|-----------|-----------|
| 1      | 6      | 0    | -0.182635 | 2.497501  | 0.437952  |
| 2      | 6      | 0    | 0.967611  | 3.151586  | 0.272160  |
| 3      | 8      | 0    | -1.926560 | 0.456487  | -1.868021 |
| 4      | 29     | 0    | -0.992334 | -0.316503 | -0.541391 |
| 5      | 8      | 0    | -2.483373 | -1.015377 | 0.659396  |
| 6      | 6      | 0    | -2.616084 | -0.237152 | 1.860016  |
| 7      | 16     | 0    | 1.830689  | -0.667755 | 0.166863  |
| 8      | 8      | 0    | 2.528971  | 0.107824  | 1.187025  |
| 9      | 8      | 0    | 1.585879  | 0.304185  | -1.111096 |
| 10     | 8      | 0    | 0.421625  | -1.013084 | 0.604475  |
| 11     | 8      | 0    | 2.528859  | -1.814318 | -0.395625 |
| 12     | 1      | 0    | 1.339486  | 1.201493  | -0.787421 |
| 13     | 1      | 0    | -2.449831 | -0.221562 | -2.312971 |
| 14     | 1      | 0    | 1.820844  | 2.976989  | 0.925109  |
| 15     | 1      | 0    | -1.043149 | 2.676687  | -0.205038 |
| 16     | 1      | 0    | -0.312076 | 1.766453  | 1.236895  |
| 17     | 1      | 0    | 1.094859  | 3.893886  | -0.512825 |
| 18     | 1      | 0    | -3.311115 | -0.956365 | 0.160047  |
| 19     | 1      | 0    | -3.450614 | -0.617725 | 2.453962  |
| 20     | 1      | 0    | -1.685373 | -0.355867 | 2.417016  |
| 21     | 1      | 0    | -2.772921 | 0.821335  | 1.625747  |

### RCa·MeOH

| Center Number | Atomic Number | Atomic Type | Coordinates (Angstroms) |           |           |
|---------------|---------------|-------------|-------------------------|-----------|-----------|
|               |               |             | X                       | Y         | Z         |
| 1             | 6             | 0           | -1.453340               | -2.244221 | -0.362919 |
| 2             | 6             | 0           | -1.566137               | -2.200546 | 1.140492  |
| 3             | 8             | 0           | -1.271289               | -0.929927 | -0.933574 |
| 4             | 29            | 0           | 0.144788                | 0.168002  | -0.076676 |
| 5             | 8             | 0           | 1.650017                | -0.973349 | -0.653849 |
| 6             | 16            | 0           | 2.733800                | -0.067340 | -0.020564 |
| 7             | 8             | 0           | 3.619338                | 0.486604  | -1.052718 |
| 8             | 8             | 0           | -1.114198               | 1.472445  | 0.760336  |
| 9             | 6             | 0           | -1.027929               | 2.779673  | 0.169592  |
| 10            | 8             | 0           | 1.802191                | 1.029076  | 0.552229  |
| 11            | 8             | 0           | 3.437660                | -0.770929 | 1.059233  |
| 12            | 8             | 0           | -3.425922               | 0.620185  | -0.398139 |
| 13            | 6             | 0           | -4.647427               | -0.002043 | -0.000279 |
| 14            | 1             | 0           | -0.629169               | -1.863649 | 1.603082  |
| 15            | 1             | 0           | -2.125674               | -0.439478 | -0.874389 |
| 16            | 1             | 0           | -1.790314               | -3.198370 | 1.531279  |
| 17            | 1             | 0           | -2.349496               | -2.677944 | -0.821743 |
| 18            | 1             | 0           | -0.588351               | -2.832428 | -0.683501 |
| 19            | 1             | 0           | -2.370920               | -1.523401 | 1.454323  |
| 20            | 1             | 0           | -3.619858               | 1.317721  | -1.038342 |
| 21            | 1             | 0           | -5.290477               | 0.702276  | 0.536427  |
| 22            | 1             | 0           | -5.183874               | -0.401459 | -0.866489 |
| 23            | 1             | 0           | -4.386368               | -0.826523 | 0.667558  |
| 24            | 1             | 0           | -1.650990               | 3.479027  | 0.733348  |
| 25            | 1             | 0           | 0.015782                | 3.093897  | 0.222696  |
| 26            | 1             | 0           | -1.350496               | 2.752362  | -0.877253 |
| 27            | 1             | 0           | -2.032824               | 1.153340  | 0.616172  |

### TS<sub>con</sub>a·MeOH

| Center Number | Atomic Number | Atomic Type | Coordinates (Angstroms) |           |           |
|---------------|---------------|-------------|-------------------------|-----------|-----------|
|               |               |             | X                       | Y         | Z         |
| 1             | 6             | 0           | 0.772490                | 2.576849  | -0.425485 |
| 2             | 6             | 0           | -0.552455               | 2.804075  | -0.108703 |
| 3             | 8             | 0           | 1.059503                | 0.545067  | -1.549355 |
| 4             | 29            | 0           | 0.103334                | -0.508748 | -0.362153 |
| 5             | 8             | 0           | 1.569368                | -1.611967 | 0.421243  |
| 6             | 6             | 0           | 2.304654                | -2.399357 | -0.521286 |
| 7             | 8             | 0           | -1.379295               | -1.183305 | 0.814849  |
| 8             | 16            | 0           | -2.468252               | -0.236126 | 0.314416  |
| 9             | 8             | 0           | -2.865649               | 0.734103  | 1.336865  |

|    |   |   |           |           |           |
|----|---|---|-----------|-----------|-----------|
| 10 | 8 | 0 | -1.635676 | 0.514489  | -0.819508 |
| 11 | 8 | 0 | -3.567280 | -0.955430 | -0.329751 |
| 12 | 8 | 0 | 2.941900  | 0.508420  | 1.312074  |
| 13 | 6 | 0 | 4.113641  | 0.767590  | 0.544703  |
| 14 | 1 | 0 | -1.117009 | 1.688057  | -0.488678 |
| 15 | 1 | 0 | 2.005215  | 0.423053  | -1.398420 |
| 16 | 1 | 0 | -1.100507 | 3.528866  | -0.710845 |
| 17 | 1 | 0 | 1.457195  | 2.124584  | 0.289747  |
| 18 | 1 | 0 | 1.213072  | 2.949820  | -1.344283 |
| 19 | 1 | 0 | -0.831159 | 2.737895  | 0.944978  |
| 20 | 1 | 0 | 3.200686  | 0.396994  | 2.235813  |
| 21 | 1 | 0 | 4.727218  | 1.546092  | 1.008448  |
| 22 | 1 | 0 | 4.718715  | -0.136837 | 0.409664  |
| 23 | 1 | 0 | 3.790166  | 1.129773  | -0.436120 |
| 24 | 1 | 0 | 3.019915  | -3.034909 | 0.008966  |
| 25 | 1 | 0 | 1.589403  | -3.026753 | -1.056404 |
| 26 | 1 | 0 | 2.838445  | -1.767816 | -1.240051 |
| 27 | 1 | 0 | 2.171036  | -0.933060 | 0.822264  |

## PCa·MeOH

| Center<br>Number | Atomic<br>Number | Atomic<br>Type | Coordinates (Angstroms) |           |           |
|------------------|------------------|----------------|-------------------------|-----------|-----------|
|                  |                  |                | X                       | Y         | Z         |
| 1                | 6                | 0              | -0.281981               | 2.375271  | 0.213089  |
| 2                | 6                | 0              | 0.783663                | 3.157461  | 0.037737  |
| 3                | 8                | 0              | -1.263310               | -0.490458 | 2.026690  |
| 4                | 29               | 0              | -0.290395               | -0.670404 | 0.523453  |
| 5                | 8                | 0              | 2.237661                | 0.446450  | 1.079737  |
| 6                | 16               | 0              | 2.526462                | -0.265109 | -0.350164 |
| 7                | 8                | 0              | 3.479763                | -1.316790 | -0.024542 |
| 8                | 8                | 0              | -1.671088               | -1.143199 | -0.863209 |
| 9                | 6                | 0              | -2.576667               | -2.190337 | -0.502475 |
| 10               | 8                | 0              | 1.176925                | -0.819358 | -0.751448 |
| 11               | 8                | 0              | 2.968182                | 0.772401  | -1.277316 |
| 12               | 8                | 0              | -3.256571               | 0.967527  | -1.246571 |
| 13               | 6                | 0              | -3.854761               | 1.184702  | 0.026562  |
| 14               | 1                | 0              | 1.752219                | 1.286240  | 0.918875  |
| 15               | 1                | 0              | -1.994719               | 0.119873  | 1.872120  |
| 16               | 1                | 0              | 1.222233                | 3.717106  | 0.861913  |
| 17               | 1                | 0              | -0.741669               | 1.837408  | -0.618557 |
| 18               | 1                | 0              | -0.749409               | 2.258413  | 1.190135  |
| 19               | 1                | 0              | 1.250139                | 3.278271  | -0.937515 |
| 20               | 1                | 0              | -3.940343               | 0.657985  | -1.854621 |
| 21               | 1                | 0              | -4.747042               | 1.813320  | -0.054713 |
| 22               | 1                | 0              | -4.126168               | 0.239950  | 0.517057  |
| 23               | 1                | 0              | -3.119525               | 1.710523  | 0.643763  |
| 24               | 1                | 0              | -3.305692               | -2.334979 | -1.306170 |
| 25               | 1                | 0              | -1.992861               | -3.103975 | -0.373994 |
| 26               | 1                | 0              | -3.098972               | -1.962314 | 0.432900  |
| 27               | 1                | 0              | -2.204170               | -0.329512 | -1.064905 |

## 2a

| Center<br>Number | Atomic<br>Number | Atomic<br>Type | Coordinates (Angstroms) |           |           |
|------------------|------------------|----------------|-------------------------|-----------|-----------|
|                  |                  |                | X                       | Y         | Z         |
| 1                | 6                | 0              | -0.664278               | -0.000035 | 0.000202  |
| 2                | 6                | 0              | 0.664317                | -0.000008 | 0.000043  |
| 3                | 1                | 0              | -1.237760               | 0.924769  | -0.000892 |
| 4                | 1                | 0              | 1.237919                | -0.924759 | -0.000636 |
| 5                | 1                | 0              | 1.237142                | 0.925215  | 0.000156  |
| 6                | 1                | 0              | -1.237537               | -0.924972 | -0.000100 |

## 1b

| Center<br>Number | Atomic<br>Number | Atomic<br>Type | Coordinates (Angstroms) |           |           |
|------------------|------------------|----------------|-------------------------|-----------|-----------|
|                  |                  |                | X                       | Y         | Z         |
| 1                | 6                | 0              | 1.752552                | 0.053512  | -0.089333 |
| 2                | 6                | 0              | 0.958525                | -1.228631 | -0.314212 |
| 3                | 6                | 0              | -0.272209               | -1.276023 | 0.585887  |
| 4                | 6                | 0              | -1.152778               | -0.046768 | 0.422827  |
| 5                | 6                | 0              | -0.349484               | 1.234831  | 0.612263  |
| 6                | 6                | 0              | 0.874835                | 1.283418  | -0.294956 |
| 7                | 8                | 0              | -1.726367               | -0.113407 | -0.883132 |
| 8                | 1                | 0              | -0.999998               | 2.105300  | 0.444554  |
| 9                | 1                | 0              | -2.234918               | 0.695919  | -1.017547 |
| 10               | 1                | 0              | -1.957799               | -0.079794 | 1.177052  |
| 11               | 1                | 0              | -0.029742               | 1.281557  | 1.664769  |
| 12               | 1                | 0              | 0.547634                | 1.324638  | -1.344702 |
| 13               | 1                | 0              | 1.445212                | 2.202274  | -0.108957 |
| 14               | 1                | 0              | 0.044406                | -1.325225 | 1.638403  |
| 15               | 1                | 0              | -0.869998               | -2.175687 | 0.388704  |
| 16               | 1                | 0              | 2.625397                | 0.087161  | -0.754280 |
| 17               | 1                | 0              | 2.141334                | 0.059005  | 0.942431  |
| 18               | 1                | 0              | 1.587526                | -2.109630 | -0.133452 |
| 19               | 1                | 0              | 0.643238                | -1.280298 | -1.366778 |

## RCb

| Center<br>Number | Atomic<br>Number | Atomic<br>Type | Coordinates (Angstroms) |           |           |
|------------------|------------------|----------------|-------------------------|-----------|-----------|
|                  |                  |                | X                       | Y         | Z         |
| 1                | 6                | 0              | 2.577502                | 0.112415  | -1.008146 |
| 2                | 6                | 0              | 2.543400                | -1.406359 | -1.067442 |
| 3                | 6                | 0              | 1.824424                | -2.066605 | 0.105377  |
| 4                | 6                | 0              | 2.365885                | -1.557781 | 1.434492  |
| 5                | 6                | 0              | 2.223375                | -0.044336 | 1.519278  |
| 6                | 6                | 0              | 2.947104                | 0.640962  | 0.364366  |
| 7                | 8                | 0              | 1.302426                | 0.705015  | -1.408496 |
| 8                | 29               | 0              | -0.335547               | 0.685642  | -0.290337 |
| 9                | 8                | 0              | -1.209435               | -0.916739 | -1.055081 |
| 10               | 16               | 0              | -2.287204               | -0.988793 | 0.054365  |
| 11               | 8                | 0              | -3.633611               | -0.889727 | -0.520617 |
| 12               | 8                | 0              | -1.914719               | 0.312450  | 0.811736  |
| 13               | 8                | 0              | -2.078236               | -2.164397 | 0.908442  |
| 14               | 1                | 0              | 2.115966                | -1.725512 | -2.028206 |
| 15               | 1                | 0              | 1.075227                | 0.368858  | -2.288498 |
| 16               | 1                | 0              | 3.299519                | 0.488100  | -1.745081 |
| 17               | 1                | 0              | 3.593179                | -1.736614 | -1.072444 |
| 18               | 1                | 0              | 0.744291                | -1.866568 | 0.052696  |
| 19               | 1                | 0              | 1.939516                | -3.155164 | 0.030122  |
| 20               | 1                | 0              | 4.025939                | 0.461431  | 0.480585  |
| 21               | 1                | 0              | 2.811553                | 1.729692  | 0.386522  |
| 22               | 1                | 0              | 1.845689                | -2.039093 | 2.272116  |
| 23               | 1                | 0              | 3.431362                | -1.825548 | 1.523479  |
| 24               | 1                | 0              | 2.622265                | 0.335718  | 2.468130  |
| 25               | 1                | 0              | 1.149612                | 0.209671  | 1.531896  |
| 26               | 8                | 0              | 0.071188                | 2.506041  | 0.461566  |
| 27               | 1                | 0              | 0.774562                | 2.892006  | -0.080879 |
| 28               | 6                | 0              | -1.048979               | 3.406656  | 0.477922  |
| 29               | 1                | 0              | -0.740152               | 4.365619  | 0.900334  |
| 30               | 1                | 0              | -1.449958               | 3.550684  | -0.529849 |
| 31               | 1                | 0              | -1.809619               | 2.952948  | 1.113514  |

## TS1b

| Center | Atomic | Atomic | Coordinates (Angstroms) |   |   |
|--------|--------|--------|-------------------------|---|---|
| Number | Number | Type   | X                       | Y | Z |

| Number | Number | Type | X         | Y         | Z         |
|--------|--------|------|-----------|-----------|-----------|
| 1      | 6      | 0    | -1.900645 | -1.515668 | -0.862788 |
| 2      | 6      | 0    | -2.502681 | -0.280901 | -1.211738 |
| 3      | 6      | 0    | -3.330170 | 0.479566  | -0.175278 |
| 4      | 6      | 0    | -3.393639 | -0.228308 | 1.175602  |
| 5      | 6      | 0    | -2.055306 | -0.857884 | 1.540785  |
| 6      | 6      | 0    | -1.696352 | -1.919507 | 0.516535  |
| 7      | 8      | 0    | 0.909376  | -1.742130 | -1.762458 |
| 8      | 29     | 0    | 1.091924  | -0.510041 | -0.401021 |
| 9      | 8      | 0    | 0.272004  | 1.180494  | -1.205321 |
| 10     | 16     | 0    | 0.572468  | 2.024510  | 0.059212  |
| 11     | 8      | 0    | 1.523789  | 3.100914  | -0.256313 |
| 12     | 8      | 0    | 1.234060  | 0.948270  | 0.941104  |
| 13     | 8      | 0    | -0.678204 | 2.502579  | 0.672600  |
| 14     | 1      | 0    | -1.462330 | 0.200666  | -1.269562 |
| 15     | 1      | 0    | 0.653585  | -1.247215 | -2.549409 |
| 16     | 1      | 0    | -1.494602 | -2.149986 | -1.651009 |
| 17     | 1      | 0    | -2.848499 | -0.229630 | -2.246914 |
| 18     | 1      | 0    | -2.903729 | 1.481946  | -0.056691 |
| 19     | 1      | 0    | -4.338076 | 0.614215  | -0.582135 |
| 20     | 1      | 0    | -2.369933 | -2.799359 | 0.595744  |
| 21     | 1      | 0    | -0.697469 | -2.360425 | 0.628471  |
| 22     | 1      | 0    | -3.713706 | 0.478222  | 1.948592  |
| 23     | 1      | 0    | -4.152262 | -1.024239 | 1.137984  |
| 24     | 1      | 0    | -2.085121 | -1.306485 | 2.538390  |
| 25     | 1      | 0    | -1.267782 | -0.089638 | 1.553115  |
| 26     | 8      | 0    | 2.017565  | -1.916773 | 0.763536  |
| 27     | 1      | 0    | 2.125082  | -2.666902 | 0.159756  |
| 28     | 6      | 0    | 3.313443  | -1.499448 | 1.219659  |
| 29     | 1      | 0    | 3.809185  | -2.325143 | 1.736607  |
| 30     | 1      | 0    | 3.930408  | -1.156287 | 0.382617  |
| 31     | 1      | 0    | 3.153363  | -0.674635 | 1.914799  |

## INT1b

| Center Number | Atomic Number | Atomic Type | Coordinates (Angstroms) |           |           |
|---------------|---------------|-------------|-------------------------|-----------|-----------|
|               |               |             | X                       | Y         | Z         |
| 1             | 6             | 0           | 2.411582                | -0.879008 | -1.560505 |
| 2             | 6             | 0           | 1.617811                | -1.827857 | -0.678009 |
| 3             | 6             | 0           | 1.645393                | -1.505646 | 0.738635  |
| 4             | 6             | 0           | 2.385671                | -0.423133 | 1.266557  |
| 5             | 6             | 0           | 3.485491                | 0.223060  | 0.431080  |
| 6             | 6             | 0           | 3.726327                | -0.514775 | -0.882115 |
| 7             | 8             | 0           | -0.335631               | 1.212154  | 1.210422  |
| 8             | 16            | 0           | -0.421930               | 2.004089  | -0.118184 |
| 9             | 8             | 0           | -1.275485               | 3.190809  | 0.042298  |
| 10            | 29            | 0           | -1.257231               | -0.427280 | 0.420469  |
| 11            | 8             | 0           | -1.104756               | 0.947913  | -1.007391 |
| 12            | 8             | 0           | -1.241458               | -1.625512 | 1.825959  |
| 13            | 8             | 0           | -2.162950               | -1.808617 | -0.784381 |
| 14            | 6             | 0           | -3.433906               | -1.366268 | -1.284094 |
| 15            | 8             | 0           | 0.929038                | 2.313095  | -0.618537 |
| 16            | 1             | 0           | 1.410185                | 0.192199  | 1.196910  |
| 17            | 1             | 0           | -0.929717               | -1.139189 | 2.597925  |
| 18            | 1             | 0           | 0.956417                | -2.040165 | 1.399475  |
| 19            | 1             | 0           | 2.538113                | -0.465296 | 2.348187  |
| 20            | 1             | 0           | 3.215369                | 1.267331  | 0.233681  |
| 21            | 1             | 0           | 4.400900                | 0.245691  | 1.031518  |
| 22            | 1             | 0           | 2.045051                | -2.852384 | -0.688028 |
| 23            | 1             | 0           | 0.576778                | -1.995235 | -0.994553 |
| 24            | 1             | 0           | 4.346458                | 0.098878  | -1.543849 |
| 25            | 1             | 0           | 4.289004                | -1.439288 | -0.683257 |
| 26            | 1             | 0           | 2.581158                | -1.342978 | -2.537004 |
| 27            | 1             | 0           | 1.817596                | 0.029842  | -1.730807 |
| 28            | 1             | 0           | -2.302791               | -2.575671 | -0.209674 |
| 29            | 1             | 0           | -3.895679               | -2.157802 | -1.879947 |
| 30            | 1             | 0           | -4.098626               | -1.078351 | -0.463209 |
| 31            | 1             | 0           | -3.239896               | -0.498865 | -1.916297 |

## TS2b

| Center<br>Number | Atomic<br>Number | Atomic<br>Type | Coordinates (Angstroms) |           |           |
|------------------|------------------|----------------|-------------------------|-----------|-----------|
|                  |                  |                | X                       | Y         | Z         |
| 1                | 6                | 0              | -1.434818               | -2.047240 | 0.412999  |
| 2                | 6                | 0              | -1.628792               | -1.490133 | -0.951884 |
| 3                | 6                | 0              | -2.531467               | -0.498382 | -1.225872 |
| 4                | 6                | 0              | -3.483744               | 0.041524  | -0.198399 |
| 5                | 6                | 0              | -3.497914               | -0.796067 | 1.077483  |
| 6                | 6                | 0              | -2.087970               | -1.197627 | 1.494369  |
| 7                | 8                | 0              | 1.563016                | -1.529612 | -1.775498 |
| 8                | 29               | 0              | 1.345744                | -0.335050 | -0.400010 |
| 9                | 8                | 0              | 2.462107                | -1.504228 | 0.853277  |
| 10               | 6                | 0              | 3.674870                | -0.867519 | 1.280189  |
| 11               | 8                | 0              | -0.135891               | 0.944954  | -1.086645 |
| 12               | 16               | 0              | 0.092863                | 1.955835  | 0.101121  |
| 13               | 8                | 0              | -1.153115               | 2.133184  | 0.856190  |
| 14               | 8                | 0              | 1.127136                | 1.160495  | 0.902944  |
| 15               | 8                | 0              | 0.661297                | 3.196055  | -0.436664 |
| 16               | 1                | 0              | -1.273169               | 0.003657  | -1.021988 |
| 17               | 1                | 0              | 1.162948                | -1.122986 | -2.552764 |
| 18               | 1                | 0              | -0.994374               | -1.869080 | -1.753761 |
| 19               | 1                | 0              | -2.657284               | -0.186005 | -2.262785 |
| 20               | 1                | 0              | -3.207776               | 1.082651  | 0.016737  |
| 21               | 1                | 0              | -4.478707               | 0.080212  | -0.657026 |
| 22               | 1                | 0              | -1.885950               | -3.052668 | 0.379999  |
| 23               | 1                | 0              | -0.367218               | -2.220041 | 0.602003  |
| 24               | 1                | 0              | -3.997329               | -0.241445 | 1.879280  |
| 25               | 1                | 0              | -4.088982               | -1.707399 | 0.904010  |
| 26               | 1                | 0              | -2.100409               | -1.749593 | 2.440039  |
| 27               | 1                | 0              | -1.480875               | -0.294165 | 1.654304  |
| 28               | 1                | 0              | 2.688777                | -2.281322 | 0.321275  |
| 29               | 1                | 0              | 4.251787                | -1.548820 | 1.910810  |
| 30               | 1                | 0              | 4.275611                | -0.553412 | 0.420364  |
| 31               | 1                | 0              | 3.383175                | 0.009377  | 1.859718  |

## PCb

| Center<br>Number | Atomic<br>Number | Atomic<br>Type | Coordinates (Angstroms) |           |           |
|------------------|------------------|----------------|-------------------------|-----------|-----------|
|                  |                  |                | X                       | Y         | Z         |
| 1                | 6                | 0              | -2.223790               | -1.166091 | 1.465323  |
| 2                | 6                | 0              | -1.571611               | -1.981397 | 0.355363  |
| 3                | 6                | 0              | -1.795961               | -1.364054 | -0.993563 |
| 4                | 6                | 0              | -2.734432               | -0.432690 | -1.226578 |
| 5                | 6                | 0              | -3.673982               | 0.073422  | -0.172386 |
| 6                | 6                | 0              | -3.651563               | -0.796734 | 1.080783  |
| 7                | 8                | 0              | 1.641273                | -1.589466 | -1.789216 |
| 8                | 29               | 0              | 1.403698                | -0.415341 | -0.422589 |
| 9                | 8                | 0              | 1.114691                | 1.056198  | 0.905502  |
| 10               | 16               | 0              | 0.217098                | 2.016065  | 0.161574  |
| 11               | 8                | 0              | 0.907422                | 3.211803  | -0.291441 |
| 12               | 8                | 0              | 2.424967                | -1.610802 | 0.870673  |
| 13               | 6                | 0              | 3.629538                | -1.005987 | 1.365995  |
| 14               | 8                | 0              | -0.004947               | 1.110009  | -1.211193 |
| 15               | 8                | 0              | -1.089726               | 2.187771  | 0.780292  |
| 16               | 1                | 0              | -0.864168               | 0.610178  | -1.151102 |
| 17               | 1                | 0              | 1.245562                | -1.180305 | -2.568815 |
| 18               | 1                | 0              | -1.161916               | -1.706427 | -1.813566 |
| 19               | 1                | 0              | -2.845939               | -0.029511 | -2.234424 |
| 20               | 1                | 0              | -3.404267               | 1.111288  | 0.079420  |
| 21               | 1                | 0              | -4.689636               | 0.128257  | -0.586964 |
| 22               | 1                | 0              | -1.981783               | -3.004601 | 0.346900  |
| 23               | 1                | 0              | -0.494650               | -2.110125 | 0.543049  |
| 24               | 1                | 0              | -4.159963               | -0.283425 | 1.905828  |
| 25               | 1                | 0              | -4.215381               | -1.722525 | 0.888072  |

|    |   |   |           |           |          |
|----|---|---|-----------|-----------|----------|
| 26 | 1 | 0 | -2.205036 | -1.726005 | 2.408087 |
| 27 | 1 | 0 | -1.641546 | -0.245247 | 1.628584 |
| 28 | 1 | 0 | 2.656386  | -2.401148 | 0.360389 |
| 29 | 1 | 0 | 4.128578  | -1.689700 | 2.057436 |
| 30 | 1 | 0 | 4.303296  | -0.744959 | 0.543897 |
| 31 | 1 | 0 | 3.331008  | -0.100843 | 1.896556 |

## 2b

| Center<br>Number | Atomic<br>Number | Atomic<br>Type | Coordinates (Angstroms) |           |           |
|------------------|------------------|----------------|-------------------------|-----------|-----------|
|                  |                  |                | X                       | Y         | Z         |
| 1                | 6                | 0              | -0.687553               | -1.179002 | 0.327639  |
| 2                | 6                | 0              | 0.687330                | -1.179128 | -0.327620 |
| 3                | 6                | 0              | 1.488559                | 0.042056  | 0.110753  |
| 4                | 6                | 0              | 0.665404                | 1.295683  | 0.059479  |
| 5                | 6                | 0              | -0.665184               | 1.295808  | -0.059377 |
| 6                | 6                | 0              | -1.488547               | 0.042306  | -0.110827 |
| 7                | 1                | 0              | -2.384176               | 0.161335  | 0.514440  |
| 8                | 1                | 0              | -1.197639               | 2.245837  | -0.117637 |
| 9                | 1                | 0              | -1.867971               | -0.104691 | -1.135581 |
| 10               | 1                | 0              | -0.560719               | -1.155638 | 1.421113  |
| 11               | 1                | 0              | -1.235958               | -2.099389 | 0.092251  |
| 12               | 1                | 0              | 1.198000                | 2.245682  | 0.117498  |
| 13               | 1                | 0              | 1.235518                | -2.099605 | -0.092083 |
| 14               | 1                | 0              | 0.560589                | -1.155866 | -1.421115 |
| 15               | 1                | 0              | 2.384201                | 0.161092  | -0.514609 |
| 16               | 1                | 0              | 1.868105                | -0.105094 | 1.135439  |

## 1c

| Center<br>Number | Atomic<br>Number | Atomic<br>Type | Coordinates (Angstroms) |           |           |
|------------------|------------------|----------------|-------------------------|-----------|-----------|
|                  |                  |                | X                       | Y         | Z         |
| 1                | 6                | 0              | -2.258610               | -0.712752 | 1.022808  |
| 2                | 6                | 0              | -1.653248               | -0.278700 | -0.298138 |
| 3                | 8                | 0              | -2.307668               | 0.926997  | -0.664052 |
| 4                | 1                | 0              | -2.054570               | 0.044402  | 1.789920  |
| 5                | 1                | 0              | -1.918983               | 1.232937  | -1.493542 |
| 6                | 1                | 0              | -1.825859               | -1.663314 | 1.350552  |
| 7                | 1                | 0              | -1.851101               | -1.059543 | -1.053024 |
| 8                | 6                | 0              | -0.156332               | -0.112295 | -0.177142 |
| 9                | 1                | 0              | -3.342902               | -0.834053 | 0.927226  |
| 10               | 6                | 0              | 0.682985                | -1.208983 | -0.379232 |
| 11               | 6                | 0              | 2.059762                | -1.086156 | -0.221965 |
| 12               | 6                | 0              | 2.613816                | 0.141172  | 0.135964  |
| 13               | 6                | 0              | 1.782571                | 1.239651  | 0.338308  |
| 14               | 6                | 0              | 0.404534                | 1.112508  | 0.185067  |
| 15               | 1                | 0              | 0.248256                | -2.166630 | -0.666237 |
| 16               | 1                | 0              | 2.703114                | -1.947545 | -0.386123 |
| 17               | 1                | 0              | 3.690144                | 0.241353  | 0.253307  |
| 18               | 1                | 0              | 2.209091                | 2.200766  | 0.616515  |
| 19               | 1                | 0              | -0.248721               | 1.968974  | 0.339811  |

## RCc

| Center<br>Number | Atomic<br>Number | Atomic<br>Type | Coordinates (Angstroms) |           |          |
|------------------|------------------|----------------|-------------------------|-----------|----------|
|                  |                  |                | X                       | Y         | Z        |
| 1                | 6                | 0              | -1.511740               | -0.889084 | 2.045857 |

|    |    |   |           |           |           |
|----|----|---|-----------|-----------|-----------|
| 2  | 6  | 0 | -2.616025 | -1.640093 | 1.649318  |
| 3  | 6  | 0 | -3.446393 | -1.168792 | 0.634273  |
| 4  | 6  | 0 | -3.166053 | 0.045631  | 0.011758  |
| 5  | 6  | 0 | -2.056264 | 0.803018  | 0.397443  |
| 6  | 6  | 0 | -1.236672 | 0.328895  | 1.428872  |
| 7  | 6  | 0 | -1.694533 | 2.036509  | -0.387080 |
| 8  | 6  | 0 | -1.100961 | 3.170284  | 0.412641  |
| 9  | 8  | 0 | -0.749017 | 1.587498  | -1.416438 |
| 10 | 29 | 0 | 0.472355  | 0.059949  | -0.877773 |
| 11 | 8  | 0 | -0.738261 | -1.237433 | -1.809124 |
| 12 | 6  | 0 | -0.628939 | -2.627061 | -1.462630 |
| 13 | 16 | 0 | 2.648914  | -0.128490 | 0.525414  |
| 14 | 8  | 0 | 2.582092  | -0.156544 | 1.992278  |
| 15 | 8  | 0 | 1.903789  | 1.111283  | -0.033149 |
| 16 | 8  | 0 | 1.741335  | -1.225331 | -0.083757 |
| 17 | 8  | 0 | 4.008301  | -0.208471 | -0.021416 |
| 18 | 1  | 0 | -0.151345 | 2.884539  | 0.876908  |
| 19 | 1  | 0 | -0.258287 | 2.351508  | -1.756582 |
| 20 | 1  | 0 | -1.796954 | 3.469647  | 1.202369  |
| 21 | 1  | 0 | -2.583819 | 2.385685  | -0.928661 |
| 22 | 1  | 0 | -0.923159 | 4.040742  | -0.227924 |
| 23 | 1  | 0 | -3.810729 | 0.413648  | -0.785663 |
| 24 | 1  | 0 | -0.367924 | 0.902948  | 1.748035  |
| 25 | 1  | 0 | -4.313741 | -1.747072 | 0.325966  |
| 26 | 1  | 0 | -0.860697 | -1.247577 | 2.839687  |
| 27 | 1  | 0 | -2.831743 | -2.589590 | 2.132731  |
| 28 | 1  | 0 | -1.649382 | -0.950434 | -1.632722 |
| 29 | 1  | 0 | -0.795922 | -2.773494 | -0.390111 |
| 30 | 1  | 0 | -1.357759 | -3.201663 | -2.039434 |
| 31 | 1  | 0 | 0.380099  | -2.945414 | -1.725681 |

### TS<sub>conc</sub>

| Center Number | Atomic Number | Atomic Type | Coordinates (Angstroms) |           |           |
|---------------|---------------|-------------|-------------------------|-----------|-----------|
|               |               |             | X                       | Y         | Z         |
| 1             | 6             | 0           | 3.326620                | 0.016479  | 1.469938  |
| 2             | 6             | 0           | 3.681848                | -0.339780 | 0.170017  |
| 3             | 6             | 0           | 2.802579                | -1.085879 | -0.598381 |
| 4             | 6             | 0           | 1.570524                | -1.509160 | -0.064483 |
| 5             | 6             | 0           | 1.226633                | -1.145856 | 1.253387  |
| 6             | 6             | 0           | 2.097610                | -0.377429 | 2.006582  |
| 7             | 6             | 0           | 0.702488                | -2.284531 | -0.903428 |
| 8             | 6             | 0           | -0.539386               | -2.804605 | -0.574703 |
| 9             | 8             | 0           | 0.263532                | 0.528693  | -2.559085 |
| 10            | 29            | 0           | -0.343202               | 0.751773  | -0.840585 |
| 11            | 16            | 0           | -2.415038               | -0.044341 | 0.651807  |
| 12            | 8             | 0           | -3.737899               | 0.563465  | 0.500448  |
| 13            | 8             | 0           | -1.943897               | -0.570270 | -0.776784 |
| 14            | 8             | 0           | -1.329275               | 0.999241  | 0.895937  |
| 15            | 8             | 0           | -2.341212               | -1.146323 | 1.616042  |
| 16            | 1             | 0           | -1.223070               | -1.710294 | -0.735813 |
| 17            | 1             | 0           | -0.390054               | -0.023934 | -3.003415 |
| 18            | 1             | 0           | -0.787532               | -2.961832 | 0.476514  |
| 19            | 1             | 0           | 1.037812                | -2.394602 | -1.936973 |
| 20            | 1             | 0           | -0.982744               | -3.509072 | -1.275665 |
| 21            | 1             | 0           | 3.054491                | -1.356285 | -1.621598 |
| 22            | 1             | 0           | 0.268901                | -1.449664 | 1.671625  |
| 23            | 1             | 0           | 4.636605                | -0.026212 | -0.242090 |
| 24            | 1             | 0           | 1.828768                | -0.086078 | 3.018254  |
| 25            | 1             | 0           | 4.009638                | 0.610769  | 2.071667  |
| 26            | 8             | 0           | 1.208862                | 2.014875  | -0.442817 |
| 27            | 1             | 0           | 1.401079                | 2.476769  | -1.270810 |
| 28            | 6             | 0           | 1.073028                | 2.969278  | 0.614991  |
| 29            | 1             | 0           | 1.997079                | 3.546073  | 0.711303  |
| 30            | 1             | 0           | 0.227527                | 3.641839  | 0.439710  |
| 31            | 1             | 0           | 0.902397                | 2.402008  | 1.531900  |

## PCc

| Center<br>Number | Atomic<br>Number | Atomic<br>Type | Coordinates (Angstroms) |           |           |
|------------------|------------------|----------------|-------------------------|-----------|-----------|
|                  |                  |                | X                       | Y         | Z         |
| 1                | 6                | 0              | 0.492200                | -2.249226 | -1.934618 |
| 2                | 6                | 0              | -0.814023               | -2.425927 | -1.483514 |
| 3                | 6                | 0              | -1.088932               | -2.334372 | -0.120058 |
| 4                | 6                | 0              | -0.058095               | -2.050331 | 0.779394  |
| 5                | 6                | 0              | 1.255073                | -1.834435 | 0.327690  |
| 6                | 6                | 0              | 1.517290                | -1.955762 | -1.041005 |
| 7                | 6                | 0              | 2.280990                | -1.472577 | 1.311970  |
| 8                | 6                | 0              | 3.478002                | -0.931966 | 1.047039  |
| 9                | 8                | 0              | -1.715054               | -0.062541 | 2.406181  |
| 10               | 29               | 0              | -1.143716               | 0.333183  | 0.734347  |
| 11               | 8                | 0              | -2.961132               | 0.858093  | -0.099443 |
| 12               | 6                | 0              | -3.244462               | 0.241725  | -1.362336 |
| 13               | 16               | 0              | 1.097235                | 1.817681  | -0.575086 |
| 14               | 8                | 0              | 2.231216                | 1.326864  | -1.354106 |
| 15               | 8                | 0              | 1.448279                | 1.590231  | 0.988723  |
| 16               | 8                | 0              | -0.131556               | 0.969921  | -0.812464 |
| 17               | 8                | 0              | 0.800334                | 3.242604  | -0.656658 |
| 18               | 1                | 0              | 1.965808                | 0.759128  | 1.091630  |
| 19               | 1                | 0              | -2.318210               | 0.638455  | 2.684151  |
| 20               | 1                | 0              | 3.807395                | -0.714573 | 0.032397  |
| 21               | 1                | 0              | 2.000234                | -1.640036 | 2.353854  |
| 22               | 1                | 0              | 4.170598                | -0.692841 | 1.848815  |
| 23               | 1                | 0              | -0.263214               | -2.017574 | 1.847842  |
| 24               | 1                | 0              | 2.531250                | -1.824996 | -1.412964 |
| 25               | 1                | 0              | -2.098265               | -2.499461 | 0.253578  |
| 26               | 1                | 0              | 0.715350                | -2.340896 | -2.994649 |
| 27               | 1                | 0              | -1.611180               | -2.650754 | -2.187878 |
| 28               | 1                | 0              | -3.663185               | 0.626285  | 0.524978  |
| 29               | 1                | 0              | -3.331082               | -0.845242 | -1.261727 |
| 30               | 1                | 0              | -4.168825               | 0.654343  | -1.775764 |
| 31               | 1                | 0              | -2.409636               | 0.478817  | -2.024169 |

## TS1c

| Center<br>Number | Atomic<br>Number | Atomic<br>Type | Coordinates (Angstroms) |           |           |
|------------------|------------------|----------------|-------------------------|-----------|-----------|
|                  |                  |                | X                       | Y         | Z         |
| 1                | 6                | 0              | 3.257867                | 0.735306  | 0.508861  |
| 2                | 6                | 0              | 2.746556                | -0.588591 | 0.441545  |
| 3                | 6                | 0              | 3.590880                | -1.643469 | 0.005999  |
| 4                | 6                | 0              | 4.894804                | -1.372989 | -0.348410 |
| 5                | 6                | 0              | 5.374843                | -0.059870 | -0.279867 |
| 6                | 6                | 0              | 4.562488                | 0.994844  | 0.149080  |
| 7                | 6                | 0              | 1.409804                | -0.793635 | 0.790997  |
| 8                | 6                | 0              | 0.657427                | -2.038064 | 0.786194  |
| 9                | 8                | 0              | 0.427713                | 0.499593  | -1.623319 |
| 10               | 29               | 0              | -1.093049               | 0.691089  | -0.594018 |
| 11               | 8                | 0              | -2.693133               | 0.613574  | 0.575470  |
| 12               | 16               | 0              | -3.119650               | -0.799106 | 0.123930  |
| 13               | 8                | 0              | -4.457963               | -0.771280 | -0.487371 |
| 14               | 8                | 0              | -0.511097               | 2.586823  | -0.098523 |
| 15               | 6                | 0              | -0.527887               | 2.898252  | 1.299225  |
| 16               | 8                | 0              | -2.037224               | -1.070268 | -0.943908 |
| 17               | 8                | 0              | -2.998315               | -1.756381 | 1.236652  |
| 18               | 1                | 0              | 0.871183                | 0.086346  | 1.151092  |
| 19               | 1                | 0              | -0.223185               | -1.899245 | 0.135846  |
| 20               | 1                | 0              | 0.409753                | -0.401341 | -1.966694 |
| 21               | 1                | 0              | 0.226650                | -2.187846 | 1.786553  |
| 22               | 1                | 0              | 1.219775                | -2.918621 | 0.476464  |
| 23               | 1                | 0              | 0.392573                | 2.670856  | -0.436489 |
| 24               | 1                | 0              | 0.116231                | 2.217527  | 1.867921  |
| 25               | 1                | 0              | -0.202111               | 3.930038  | 1.455244  |
| 26               | 1                | 0              | -1.558739               | 2.785559  | 1.636789  |
| 27               | 1                | 0              | 3.209690                | -2.658588 | -0.043432 |



|    |   |   |          |           |           |
|----|---|---|----------|-----------|-----------|
| 28 | 1 | 0 | 5.549629 | -2.171604 | -0.681741 |
| 29 | 1 | 0 | 6.403360 | 0.143994  | -0.565736 |
| 30 | 1 | 0 | 4.958299 | 2.004260  | 0.193539  |
| 31 | 1 | 0 | 2.599162 | 1.535600  | 0.840526  |

---

### INT1c

| Center Number | Atomic Number | Atomic Type | Coordinates (Angstroms) |           |           |
|---------------|---------------|-------------|-------------------------|-----------|-----------|
|               |               |             | X                       | Y         | Z         |
| 1             | 6             | 0           | -1.683244               | -0.296345 | -1.337264 |
| 2             | 6             | 0           | -1.759057               | -1.355143 | -0.388163 |
| 3             | 6             | 0           | -2.835367               | -1.384851 | 0.540224  |
| 4             | 6             | 0           | -3.794426               | -0.397438 | 0.506318  |
| 5             | 6             | 0           | -3.698888               | 0.633653  | -0.437858 |
| 6             | 6             | 0           | -2.648359               | 0.688650  | -1.358828 |
| 7             | 6             | 0           | -0.755792               | -2.321004 | -0.415926 |
| 8             | 6             | 0           | -0.624180               | -3.507544 | 0.415526  |
| 9             | 8             | 0           | 1.472737                | -0.756650 | 1.034064  |
| 10            | 16            | 0           | 2.409081                | -0.699824 | -0.189092 |
| 11            | 8             | 0           | 3.781752                | -0.357469 | 0.219686  |
| 12            | 29            | 0           | 0.408031                | 0.882711  | 0.437850  |
| 13            | 8             | 0           | 1.762835                | 0.461032  | -0.969512 |
| 14            | 8             | 0           | -0.702073               | 1.180472  | 1.872343  |
| 15            | 8             | 0           | -0.197588               | 2.627542  | -0.479201 |
| 16            | 6             | 0           | 0.734729                | 3.680070  | -0.194244 |
| 17            | 8             | 0           | 2.328623                | -1.953074 | -0.964289 |
| 18            | 1             | 0           | 0.040083                | -2.175949 | -1.151422 |
| 19            | 1             | 0           | 0.356032                | -3.457871 | 0.912789  |
| 20            | 1             | 0           | -0.461283               | 0.531344  | 2.542461  |
| 21            | 1             | 0           | -0.547030               | -4.382114 | -0.247160 |
| 22            | 1             | 0           | -1.415271               | -3.660421 | 1.149433  |
| 23            | 1             | 0           | -1.049214               | 2.849131  | -0.074135 |
| 24            | 1             | 0           | 0.406898                | 4.611550  | -0.663735 |
| 25            | 1             | 0           | 0.845575                | 3.823124  | 0.886376  |
| 26            | 1             | 0           | 1.692832                | 3.373436  | -0.619360 |
| 27            | 1             | 0           | -2.899991               | -2.182312 | 1.273902  |
| 28            | 1             | 0           | -4.621547               | -0.411092 | 1.208528  |
| 29            | 1             | 0           | -4.460714               | 1.408355  | -0.454161 |
| 30            | 1             | 0           | -2.595479               | 1.497878  | -2.079911 |
| 31            | 1             | 0           | -0.851859               | -0.281620 | -2.039209 |

---

### TS2c

| Center Number | Atomic Number | Atomic Type | Coordinates (Angstroms) |           |           |
|---------------|---------------|-------------|-------------------------|-----------|-----------|
|               |               |             | X                       | Y         | Z         |
| 1             | 1             | 0           | 0.089381                | -1.840625 | 1.787985  |
| 2             | 6             | 0           | 0.580916                | -2.069136 | 0.838967  |
| 3             | 6             | 0           | -0.095997               | -2.902457 | -0.035123 |
| 4             | 8             | 0           | 0.852322                | 0.909157  | -1.834526 |
| 5             | 29            | 0           | -0.300985               | 0.731019  | -0.419011 |
| 6             | 8             | 0           | 0.502507                | 2.433636  | 0.418852  |
| 7             | 6             | 0           | -0.406936               | 3.542866  | 0.444305  |
| 8             | 16            | 0           | -2.644693               | -0.452073 | 0.114417  |
| 9             | 8             | 0           | -2.909117               | -1.587152 | 1.003540  |
| 10            | 8             | 0           | -1.572751               | -0.880570 | -0.969968 |
| 11            | 8             | 0           | -1.851878               | 0.645543  | 0.827253  |
| 12            | 8             | 0           | -3.818830               | 0.086505  | -0.575520 |
| 13            | 1             | 0           | -0.814835               | -1.909846 | -0.468225 |
| 14            | 1             | 0           | 1.170793                | 0.028476  | -2.064666 |
| 15            | 1             | 0           | -0.871154               | -3.546931 | 0.376687  |
| 16            | 6             | 0           | 1.777976                | -1.331370 | 0.563593  |
| 17            | 1             | 0           | 0.401525                | -3.259127 | -0.937225 |
| 18            | 1             | 0           | 1.201719                | 2.611444  | -0.230215 |
| 19            | 1             | 0           | 0.123405                | 4.451483  | 0.741275  |

|    |   |   |           |           |           |
|----|---|---|-----------|-----------|-----------|
| 20 | 1 | 0 | -0.878434 | 3.687533  | -0.533486 |
| 21 | 1 | 0 | -1.172483 | 3.309700  | 1.185389  |
| 22 | 6 | 0 | 2.611375  | -1.646248 | -0.528484 |
| 23 | 6 | 0 | 3.736071  | -0.883269 | -0.782597 |
| 24 | 6 | 0 | 4.043683  | 0.202499  | 0.043337  |
| 25 | 6 | 0 | 3.234038  | 0.520740  | 1.131500  |
| 26 | 6 | 0 | 2.108814  | -0.246834 | 1.397337  |
| 27 | 1 | 0 | 2.378152  | -2.499081 | -1.160510 |
| 28 | 1 | 0 | 4.383140  | -1.129651 | -1.619600 |
| 29 | 1 | 0 | 4.929343  | 0.798335  | -0.162018 |
| 30 | 1 | 0 | 3.482207  | 1.364298  | 1.769414  |
| 31 | 1 | 0 | 1.463225  | -0.010103 | 2.241803  |

## 1d

| Center Number | Atomic Number | Atomic Type | Coordinates (Angstroms) |           |           |
|---------------|---------------|-------------|-------------------------|-----------|-----------|
|               |               |             | X                       | Y         | Z         |
| 1             | 6             | 0           | -0.798626               | -1.200017 | -0.018480 |
| 2             | 6             | 0           | -0.065067               | -0.013006 | -0.019268 |
| 3             | 6             | 0           | -0.764100               | 1.199002  | 0.002072  |
| 4             | 6             | 0           | -2.154258               | 1.221732  | 0.010486  |
| 5             | 6             | 0           | -2.876076               | 0.030101  | -0.000829 |
| 6             | 6             | 0           | -2.191784               | -1.180244 | -0.012795 |
| 7             | 6             | 0           | 1.459057                | -0.030787 | -0.001100 |
| 8             | 8             | 0           | 1.955896                | -1.351307 | -0.224570 |
| 9             | 6             | 0           | 1.960381                | 0.348688  | 1.385184  |
| 10            | 1             | 0           | 1.575521                | -0.356323 | 2.130935  |
| 11            | 1             | 0           | 1.694736                | -1.614172 | -1.117614 |
| 12            | 1             | 0           | 1.628350                | 1.356208  | 1.655976  |
| 13            | 6             | 0           | 2.042924                | 0.896204  | -1.061467 |
| 14            | 1             | 0           | 3.056302                | 0.322424  | 1.407504  |
| 15            | 1             | 0           | -0.218879               | 2.141321  | 0.017584  |
| 16            | 1             | 0           | -2.676602               | 2.175536  | 0.024888  |
| 17            | 1             | 0           | -3.963191               | 0.047203  | 0.002414  |
| 18            | 1             | 0           | -2.741892               | -2.118566 | -0.016398 |
| 19            | 1             | 0           | -0.271018               | -2.150071 | -0.019135 |
| 20            | 1             | 0           | 3.135585                | 0.812184  | -1.050929 |
| 21            | 1             | 0           | 1.679317                | 0.621005  | -2.059273 |
| 22            | 1             | 0           | 1.779889                | 1.943677  | -0.882214 |

## CuSO<sub>4</sub>-anion

| Center Number | Atomic Number | Atomic Type | Coordinates (Angstroms) |           |           |
|---------------|---------------|-------------|-------------------------|-----------|-----------|
|               |               |             | X                       | Y         | Z         |
| 1             | 8             | 0           | -1.123695               | 1.160838  | 0.320351  |
| 2             | 16            | 0           | -1.792590               | -0.200945 | 0.007414  |
| 3             | 8             | 0           | -2.449263               | -0.741701 | 1.206988  |
| 4             | 29            | 0           | 0.752122                | 0.447919  | -0.045949 |
| 5             | 8             | 0           | -0.544827               | -1.026129 | -0.359473 |
| 6             | 8             | 0           | 1.814254                | 1.938978  | 0.199056  |
| 7             | 8             | 0           | 2.389681                | -0.672940 | -0.538046 |
| 8             | 6             | 0           | 2.582715                | -1.794229 | 0.337261  |
| 9             | 8             | 0           | -2.693806               | -0.074244 | -1.151340 |
| 10            | 1             | 0           | 1.242761                | 2.627080  | 0.558967  |
| 11            | 1             | 0           | 3.137322                | -0.065397 | -0.437342 |
| 12            | 1             | 0           | 3.495081                | -2.329254 | 0.061331  |
| 13            | 1             | 0           | 2.638933                | -1.470505 | 1.381600  |
| 14            | 1             | 0           | 1.720765                | -2.449505 | 0.205501  |

## Cyclohexane-cation

| Center Number | Atomic Number | Atomic Type | Coordinates (Angstroms) |   |   |
|---------------|---------------|-------------|-------------------------|---|---|
|               |               |             | X                       | Y | Z |

|    |   |   |           |           |           |
|----|---|---|-----------|-----------|-----------|
| 1  | 6 | 0 | 0.852514  | -1.108857 | 0.341337  |
| 2  | 6 | 0 | 1.470098  | 0.213475  | -0.082000 |
| 3  | 6 | 0 | 0.534211  | 1.322018  | -0.163931 |
| 4  | 6 | 0 | -0.849945 | 1.179619  | 0.085829  |
| 5  | 6 | 0 | -1.482961 | -0.207632 | 0.081351  |
| 6  | 6 | 0 | -0.498024 | -1.293833 | -0.339299 |
| 7  | 1 | 0 | -0.622502 | 1.517142  | 1.167219  |
| 8  | 1 | 0 | 0.942403  | 2.329363  | -0.289407 |
| 9  | 1 | 0 | -1.461750 | 2.010158  | -0.275887 |
| 10 | 1 | 0 | -1.877315 | -0.422074 | 1.081818  |
| 11 | 1 | 0 | -2.343461 | -0.187459 | -0.595515 |
| 12 | 1 | 0 | 1.864104  | 0.169516  | -1.118877 |
| 13 | 1 | 0 | 2.351876  | 0.521894  | 0.500503  |
| 14 | 1 | 0 | -0.914574 | -2.280514 | -0.111325 |
| 15 | 1 | 0 | -0.352711 | -1.252307 | -1.429269 |
| 16 | 1 | 0 | 1.537487  | -1.927054 | 0.098558  |
| 17 | 1 | 0 | 0.721093  | -1.107410 | 1.432463  |

## RCd

| Center Number | Atomic Number | Atomic Type | Coordinates (Angstroms) |           |           |
|---------------|---------------|-------------|-------------------------|-----------|-----------|
|               |               |             | X                       | Y         | Z         |
| 1             | 6             | 0           | -1.154562               | -0.269108 | 1.478891  |
| 2             | 6             | 0           | -1.360321               | -1.582205 | 1.894709  |
| 3             | 6             | 0           | -2.438081               | -2.311754 | 1.400944  |
| 4             | 6             | 0           | -3.300516               | -1.720117 | 0.482512  |
| 5             | 6             | 0           | -3.090849               | -0.407853 | 0.064352  |
| 6             | 6             | 0           | -2.017609               | 0.341282  | 0.558523  |
| 7             | 6             | 0           | -1.731024               | 1.743853  | 0.039761  |
| 8             | 6             | 0           | -1.040712               | 2.636140  | 1.056704  |
| 9             | 8             | 0           | -0.813166               | 1.527262  | -1.098798 |
| 10            | 29            | 0           | 0.621698                | 0.143523  | -0.839130 |
| 11            | 8             | 0           | 2.088186                | -1.068697 | -0.324460 |
| 12            | 16            | 0           | 2.863037                | 0.013727  | 0.467365  |
| 13            | 8             | 0           | 4.204847                | 0.212438  | -0.091856 |
| 14            | 8             | 0           | -0.426801               | -1.151116 | -1.966608 |
| 15            | 6             | 0           | -0.276192               | -2.549487 | -1.672005 |
| 16            | 8             | 0           | 1.947082                | 1.222137  | 0.146695  |
| 17            | 8             | 0           | 2.842674                | -0.283621 | 1.905375  |
| 18            | 1             | 0           | -0.068627               | 2.241437  | 1.363980  |
| 19            | 1             | 0           | -0.433853               | 2.381156  | -1.362705 |
| 20            | 1             | 0           | -1.673917               | 2.750434  | 1.942861  |
| 21            | 6             | 0           | -2.954156               | 2.449057  | -0.518736 |
| 22            | 1             | 0           | -0.880284               | 3.631110  | 0.625318  |
| 23            | 1             | 0           | -3.783224               | 0.029504  | -0.649972 |
| 24            | 1             | 0           | -0.303212               | 0.276412  | 1.880385  |
| 25            | 1             | 0           | -4.146574               | -2.278745 | 0.089989  |
| 26            | 1             | 0           | -0.675619               | -2.029508 | 2.611377  |
| 27            | 1             | 0           | -2.603923               | -3.334768 | 1.729006  |
| 28            | 1             | 0           | -1.362955               | -0.918816 | -1.862232 |
| 29            | 1             | 0           | -0.507345               | -2.750122 | -0.619895 |
| 30            | 1             | 0           | -0.939108               | -3.128290 | -2.319745 |
| 31            | 1             | 0           | 0.761475                | -2.811009 | -1.879635 |
| 32            | 1             | 0           | -2.677758               | 3.452407  | -0.861688 |
| 33            | 1             | 0           | -3.383794               | 1.908940  | -1.366929 |
| 34            | 1             | 0           | -3.717559               | 2.551991  | 0.260084  |

## TS1d

| Center Number | Atomic Number | Atomic Type | Coordinates (Angstroms) |           |           |
|---------------|---------------|-------------|-------------------------|-----------|-----------|
|               |               |             | X                       | Y         | Z         |
| 1             | 6             | 0           | 1.927040                | -1.848528 | -0.303174 |
| 2             | 6             | 0           | 0.883245                | -2.870444 | -0.086799 |
| 3             | 8             | 0           | 0.491441                | -0.201073 | -2.298633 |

|    |    |   |           |           |           |
|----|----|---|-----------|-----------|-----------|
| 4  | 29 | 0 | -0.558189 | 0.415478  | -0.906384 |
| 5  | 8  | 0 | -1.868790 | -1.118828 | -0.669084 |
| 6  | 16 | 0 | -2.537101 | -0.474958 | 0.564841  |
| 7  | 8  | 0 | -3.978229 | -0.284233 | 0.335535  |
| 8  | 8  | 0 | -1.800324 | 0.877262  | 0.592081  |
| 9  | 8  | 0 | -2.234943 | -1.256190 | 1.779459  |
| 10 | 1  | 0 | -0.113628 | -2.418672 | -0.213063 |
| 11 | 1  | 0 | 0.083971  | -1.021266 | -2.600755 |
| 12 | 1  | 0 | 0.989485  | -3.703854 | -0.782797 |
| 13 | 8  | 0 | 0.451989  | 2.201847  | -0.882859 |
| 14 | 1  | 0 | 1.137939  | 2.091866  | -1.557624 |
| 15 | 6  | 0 | -0.390690 | 3.298555  | -1.263542 |
| 16 | 1  | 0 | 0.197911  | 4.217316  | -1.329281 |
| 17 | 1  | 0 | -0.884180 | 3.101324  | -2.221214 |
| 18 | 1  | 0 | -1.145060 | 3.404810  | -0.482552 |
| 19 | 1  | 0 | 0.920595  | -3.249308 | 0.940993  |
| 20 | 6  | 0 | 2.876104  | -2.134005 | -1.388818 |
| 21 | 1  | 0 | 3.465060  | -3.007944 | -1.068270 |
| 22 | 1  | 0 | 2.322937  | -2.469283 | -2.273266 |
| 23 | 1  | 0 | 3.554638  | -1.326832 | -1.656742 |
| 24 | 6  | 0 | 2.025243  | -0.708560 | 0.542838  |
| 25 | 6  | 0 | 3.042130  | 0.261110  | 0.360414  |
| 26 | 6  | 0 | 1.080987  | -0.512213 | 1.581517  |
| 27 | 6  | 0 | 3.108508  | 1.369006  | 1.182199  |
| 28 | 1  | 0 | 3.780315  | 0.142072  | -0.425427 |
| 29 | 6  | 0 | 1.149452  | 0.602082  | 2.393931  |
| 30 | 1  | 0 | 0.278688  | -1.228509 | 1.734443  |
| 31 | 6  | 0 | 2.162475  | 1.542215  | 2.195156  |
| 32 | 1  | 0 | 3.892053  | 2.106531  | 1.038257  |
| 33 | 1  | 0 | 0.410105  | 0.746897  | 3.176325  |
| 34 | 1  | 0 | 2.214175  | 2.419733  | 2.834315  |

## INTd

| Center<br>Number | Atomic<br>Number | Atomic<br>Type | Coordinates (Angstroms) |           |           |
|------------------|------------------|----------------|-------------------------|-----------|-----------|
|                  |                  |                | X                       | Y         | Z         |
| 1                | 6                | 0              | 1.929940                | 0.198310  | -2.254361 |
| 2                | 6                | 0              | 2.988359                | -0.356468 | -1.531515 |
| 3                | 6                | 0              | 3.219863                | 0.011032  | -0.202686 |
| 4                | 6                | 0              | 2.384977                | 0.925728  | 0.409270  |
| 5                | 6                | 0              | 1.319309                | 1.522463  | -0.311396 |
| 6                | 6                | 0              | 1.113013                | 1.140725  | -1.660478 |
| 7                | 6                | 0              | 0.477728                | 2.481378  | 0.318241  |
| 8                | 6                | 0              | -0.518126               | 3.261343  | -0.423078 |
| 9                | 8                | 0              | 0.359669                | -0.523664 | 2.601954  |
| 10               | 29               | 0              | -0.253757               | -0.897186 | 0.893943  |
| 11               | 8                | 0              | 1.147824                | -2.388217 | 0.677758  |
| 12               | 6                | 0              | 1.158947                | -3.148846 | -0.535153 |
| 13               | 16               | 0              | -2.322286               | -0.211684 | -0.572066 |
| 14               | 8                | 0              | -2.346121               | 0.860634  | -1.584854 |
| 15               | 8                | 0              | -1.878107               | 0.335011  | 0.798497  |
| 16               | 8                | 0              | -1.168968               | -1.195960 | -0.853116 |
| 17               | 8                | 0              | -3.604937               | -0.926971 | -0.457319 |
| 18               | 1                | 0              | -1.466430               | 2.704213  | -0.318334 |
| 19               | 1                | 0              | -0.371678               | -0.075461 | 3.042239  |
| 20               | 1                | 0              | -0.315390               | 3.371696  | -1.488209 |
| 21               | 6                | 0              | 0.546999                | 2.702397  | 1.773019  |
| 22               | 1                | 0              | -0.672580               | 4.235624  | 0.048685  |
| 23               | 1                | 0              | 2.568358                | 1.210643  | 1.440361  |
| 24               | 1                | 0              | 0.286958                | 1.562831  | -2.223885 |
| 25               | 1                | 0              | 4.055741                | -0.414781 | 0.345044  |
| 26               | 1                | 0              | 1.754046                | -0.104950 | -3.281734 |
| 27               | 1                | 0              | 3.641447                | -1.083314 | -2.008113 |
| 28               | 1                | 0              | 2.010001                | -1.958948 | 0.787051  |
| 29               | 1                | 0              | 1.276937                | -2.499811 | -1.410034 |
| 30               | 1                | 0              | 1.967770                | -3.883735 | -0.503899 |
| 31               | 1                | 0              | 0.199613                | -3.664482 | -0.596999 |
| 32               | 1                | 0              | -0.276119               | 3.328128  | 2.121871  |
| 33               | 1                | 0              | 0.565997                | 1.744819  | 2.312950  |
| 34               | 1                | 0              | 1.489929                | 3.217836  | 2.007177  |

-----

## TS2d

| Center<br>Number | Atomic<br>Number | Atomic<br>Type | Coordinates (Angstroms) |           |           |
|------------------|------------------|----------------|-------------------------|-----------|-----------|
|                  |                  |                | X                       | Y         | Z         |
| 1                | 6                | 0              | 1.728416                | 0.721891  | 2.091784  |
| 2                | 6                | 0              | 2.940109                | 1.098425  | 1.512974  |
| 3                | 6                | 0              | 3.487172                | 0.334587  | 0.482389  |
| 4                | 6                | 0              | 2.822167                | -0.797174 | 0.029273  |
| 5                | 6                | 0              | 1.599850                | -1.192886 | 0.601802  |
| 6                | 6                | 0              | 1.067810                | -0.413310 | 1.647683  |
| 7                | 6                | 0              | 0.886294                | -2.360036 | 0.086160  |
| 8                | 6                | 0              | -0.337000               | -2.767440 | 0.605671  |
| 9                | 8                | 0              | 0.417933                | -0.140397 | -2.510286 |
| 10               | 29               | 0              | -0.354844               | 0.576026  | -1.002935 |
| 11               | 8                | 0              | 0.977984                | 2.138156  | -1.034720 |
| 12               | 6                | 0              | 0.673771                | 3.293587  | -0.246372 |
| 13               | 16               | 0              | -2.491355               | 0.058339  | 0.540813  |
| 14               | 8                | 0              | -2.412384               | -0.585449 | 1.855707  |
| 15               | 8                | 0              | -1.793631               | -0.878221 | -0.541456 |
| 16               | 8                | 0              | -1.568607               | 1.269425  | 0.442041  |
| 17               | 8                | 0              | -3.846503               | 0.362275  | 0.078514  |
| 18               | 1                | 0              | -1.039485               | -1.852757 | -0.027510 |
| 19               | 1                | 0              | -0.112093               | -0.911773 | -2.744274 |
| 20               | 1                | 0              | -0.621104               | -2.482889 | 1.617813  |
| 21               | 6                | 0              | 1.405783                | -3.045969 | -1.125522 |
| 22               | 1                | 0              | -0.732605               | -3.720748 | 0.259376  |
| 23               | 1                | 0              | 3.260445                | -1.376597 | -0.777502 |
| 24               | 1                | 0              | 0.117073                | -0.674415 | 2.105170  |
| 25               | 1                | 0              | 4.433203                | 0.621018  | 0.031582  |
| 26               | 1                | 0              | 1.296750                | 1.318232  | 2.891249  |
| 27               | 1                | 0              | 3.457105                | 1.988590  | 1.862562  |
| 28               | 1                | 0              | 1.829443                | 1.775383  | -0.738100 |
| 29               | 1                | 0              | 0.585735                | 3.037292  | 0.814951  |
| 30               | 1                | 0              | 1.453109                | 4.048455  | -0.383222 |
| 31               | 1                | 0              | -0.279172               | 3.684812  | -0.606258 |
| 32               | 1                | 0              | 0.746995                | -3.859738 | -1.433382 |
| 33               | 1                | 0              | 1.510963                | -2.329216 | -1.948783 |
| 34               | 1                | 0              | 2.401214                | -3.460176 | -0.925024 |

## PCd

| Center<br>Number | Atomic<br>Number | Atomic<br>Type | Coordinates (Angstroms) |           |           |
|------------------|------------------|----------------|-------------------------|-----------|-----------|
|                  |                  |                | X                       | Y         | Z         |
| 1                | 6                | 0              | 0.994867                | 0.584802  | -1.544544 |
| 2                | 6                | 0              | 1.650580                | -0.522471 | -2.071562 |
| 3                | 6                | 0              | 2.883529                | -0.918916 | -1.558021 |
| 4                | 6                | 0              | 3.450613                | -0.199862 | -0.509559 |
| 5                | 6                | 0              | 2.793076                | 0.905720  | 0.020355  |
| 6                | 6                | 0              | 1.557844                | 1.327096  | -0.493702 |
| 7                | 6                | 0              | 0.863059                | 2.507398  | 0.074942  |
| 8                | 6                | 0              | 1.237734                | 2.930009  | 1.464244  |
| 9                | 6                | 0              | -0.080993               | 3.180014  | -0.609000 |
| 10               | 8                | 0              | -1.707737               | 0.845173  | 0.716654  |
| 11               | 16               | 0              | -2.505075               | 0.038783  | -0.506925 |
| 12               | 8                | 0              | -3.817341               | -0.262192 | 0.041322  |
| 13               | 29               | 0              | -0.242257               | -0.760582 | 0.883625  |
| 14               | 8                | 0              | -1.600768               | -1.162484 | -0.585829 |
| 15               | 8                | 0              | 0.562308                | -0.365628 | 2.482258  |
| 16               | 8                | 0              | 0.942318                | -2.398678 | 0.705691  |
| 17               | 6                | 0              | 0.520305                | -3.463657 | -0.154038 |
| 18               | 8                | 0              | -2.454232               | 0.897870  | -1.682053 |
| 19               | 1                | 0              | -1.210793               | 1.622072  | 0.346547  |
| 20               | 1                | 0              | -0.012981               | 0.280376  | 2.912301  |

|    |   |   |           |           |           |
|----|---|---|-----------|-----------|-----------|
| 21 | 1 | 0 | -0.346539 | 2.935224  | -1.634558 |
| 22 | 1 | 0 | -0.580103 | 4.037826  | -0.163497 |
| 23 | 1 | 0 | 3.253454  | 1.451123  | 0.840419  |
| 24 | 1 | 0 | 0.019162  | 0.862111  | -1.938644 |
| 25 | 1 | 0 | 4.410145  | -0.502019 | -0.096619 |
| 26 | 1 | 0 | 1.187191  | -1.085694 | -2.879098 |
| 27 | 1 | 0 | 3.392046  | -1.790383 | -1.963987 |
| 28 | 1 | 0 | 1.085958  | -2.735465 | 1.602097  |
| 29 | 1 | 0 | 1.306439  | -4.221879 | -0.210206 |
| 30 | 1 | 0 | -0.412761 | -3.914456 | 0.198688  |
| 31 | 1 | 0 | 0.365623  | -3.027534 | -1.143509 |
| 32 | 1 | 0 | 0.576387  | 3.723830  | 1.822634  |
| 33 | 1 | 0 | 1.186574  | 2.078725  | 2.154809  |
| 34 | 1 | 0 | 2.266764  | 3.309175  | 1.499277  |

## 2d

| Center Number | Atomic Number | Atomic Type | Coordinates (Angstroms) |           |           |
|---------------|---------------|-------------|-------------------------|-----------|-----------|
|               |               |             | X                       | Y         | Z         |
| 1             | 6             | 0           | 0.571878                | 1.209769  | -0.177955 |
| 2             | 6             | 0           | -0.206711               | 0.057559  | 0.007925  |
| 3             | 6             | 0           | 0.460959                | -1.163551 | 0.171571  |
| 4             | 6             | 0           | 1.851045                | -1.227759 | 0.175950  |
| 5             | 6             | 0           | 2.607372                | -0.072990 | 0.004625  |
| 6             | 6             | 0           | 1.959009                | 1.147274  | -0.176242 |
| 7             | 6             | 0           | -1.687449               | 0.122388  | 0.020737  |
| 8             | 6             | 0           | -2.343823               | 1.249002  | 0.328909  |
| 9             | 1             | 0           | -3.431072               | 1.281003  | 0.317484  |
| 10            | 6             | 0           | -2.441190               | -1.133229 | -0.307179 |
| 11            | 1             | 0           | -1.831313               | 2.163701  | 0.617204  |
| 12            | 1             | 0           | -0.109892               | -2.078762 | 0.308669  |
| 13            | 1             | 0           | 2.343707                | -2.187522 | 0.312366  |
| 14            | 1             | 0           | 3.693348                | -0.122871 | 0.001698  |
| 15            | 1             | 0           | 2.537886                | 2.055250  | -0.328152 |
| 16            | 1             | 0           | 0.081796                | 2.165775  | -0.349208 |
| 17            | 1             | 0           | -3.514497               | -0.935911 | -0.380947 |
| 18            | 1             | 0           | -2.099238               | -1.570850 | -1.253181 |
| 19            | 1             | 0           | -2.297265               | -1.900583 | 0.464021  |

## 1e

| Center Number | Atomic Number | Atomic Type | Coordinates (Angstroms) |           |           |
|---------------|---------------|-------------|-------------------------|-----------|-----------|
|               |               |             | X                       | Y         | Z         |
| 1             | 6             | 0           | 2.210836                | 1.265700  | -0.367987 |
| 2             | 6             | 0           | 1.359105                | 0.056809  | -0.008504 |
| 3             | 6             | 0           | 1.651855                | -0.389377 | 1.412862  |
| 4             | 6             | 0           | -0.121501               | 0.386244  | -0.213573 |
| 5             | 6             | 0           | -1.091119               | -0.737365 | 0.123721  |
| 6             | 6             | 0           | -2.509808               | -0.481614 | -0.371479 |
| 7             | 6             | 0           | -3.155286               | 0.749573  | 0.245836  |
| 8             | 8             | 0           | 1.739793                | -1.049788 | -0.840791 |
| 9             | 1             | 0           | 3.275411                | 1.020995  | -0.274874 |
| 10            | 1             | 0           | 1.582684                | -0.784358 | -1.756801 |
| 11            | 1             | 0           | 1.990746                | 2.112519  | 0.292928  |
| 12            | 1             | 0           | 2.017159                | 1.583317  | -1.400887 |
| 13            | 1             | 0           | 1.334588                | 0.379056  | 2.127153  |
| 14            | 1             | 0           | 1.127962                | -1.321638 | 1.650288  |
| 15            | 1             | 0           | 2.727220                | -0.559766 | 1.541443  |
| 16            | 1             | 0           | -0.354566               | 1.283593  | 0.379447  |
| 17            | 1             | 0           | -0.257752               | 0.677502  | -1.270304 |
| 18            | 1             | 0           | -0.714440               | -1.673060 | -0.313130 |
| 19            | 1             | 0           | -1.117240               | -0.892173 | 1.213840  |
| 20            | 1             | 0           | -3.128200               | -1.363876 | -0.155491 |
| 21            | 1             | 0           | -2.496399               | -0.380464 | -1.467690 |

|    |   |   |           |          |           |
|----|---|---|-----------|----------|-----------|
| 22 | 1 | 0 | -4.202751 | 0.851421 | -0.058571 |
| 23 | 1 | 0 | -3.129976 | 0.695177 | 1.342424  |
| 24 | 1 | 0 | -2.637287 | 1.670243 | -0.048705 |

### R<sub>Ce</sub>-a<sub>S</sub>

| Center Number | Atomic Number | Atomic Type | Coordinates (Angstroms) |           |           |
|---------------|---------------|-------------|-------------------------|-----------|-----------|
|               |               |             | X                       | Y         | Z         |
| 1             | 6             | 0           | 2.210836                | 1.265700  | -0.367987 |
| 2             | 6             | 0           | 1.359105                | 0.056809  | -0.008504 |
| 3             | 6             | 0           | 1.651855                | -0.389377 | 1.412862  |
| 4             | 6             | 0           | -0.121501               | 0.386244  | -0.213573 |
| 5             | 6             | 0           | -1.091119               | -0.737365 | 0.123721  |
| 6             | 6             | 0           | -2.509808               | -0.481614 | -0.371479 |
| 7             | 6             | 0           | -3.155286               | 0.749573  | 0.245836  |
| 8             | 8             | 0           | 1.739793                | -1.049788 | -0.840791 |
| 9             | 1             | 0           | 3.275411                | 1.020995  | -0.274874 |
| 10            | 1             | 0           | 1.582684                | -0.784358 | -1.756801 |
| 11            | 1             | 0           | 1.990746                | 2.112519  | 0.292928  |
| 12            | 1             | 0           | 2.017159                | 1.583317  | -1.400887 |
| 13            | 1             | 0           | 1.334588                | 0.379056  | 2.127153  |
| 14            | 1             | 0           | 1.127962                | -1.321638 | 1.650288  |
| 15            | 1             | 0           | 2.727220                | -0.559766 | 1.541443  |
| 16            | 1             | 0           | -0.354566               | 1.283593  | 0.379447  |
| 17            | 1             | 0           | -0.257752               | 0.677502  | -1.270304 |
| 18            | 1             | 0           | -0.714440               | -1.673060 | -0.313130 |
| 19            | 1             | 0           | -1.117240               | -0.892173 | 1.213840  |
| 20            | 1             | 0           | -3.128200               | -1.363876 | -0.155491 |
| 21            | 1             | 0           | -2.496399               | -0.380464 | -1.467690 |
| 22            | 1             | 0           | -4.202751               | 0.851421  | -0.058571 |
| 23            | 1             | 0           | -3.129976               | 0.695177  | 1.342424  |
| 24            | 1             | 0           | -2.637287               | 1.670243  | -0.048705 |

### TS1e-a<sub>S</sub>

| Center Number | Atomic Number | Atomic Type | Coordinates (Angstroms) |           |           |
|---------------|---------------|-------------|-------------------------|-----------|-----------|
|               |               |             | X                       | Y         | Z         |
| 1             | 6             | 0           | 0.693542                | -2.512991 | -0.472300 |
| 2             | 6             | 0           | 1.398210                | -1.494824 | 0.288151  |
| 3             | 6             | 0           | 2.715309                | -1.047767 | -0.151459 |
| 4             | 6             | 0           | 3.307971                | 0.213907  | 0.450294  |
| 5             | 6             | 0           | 4.668257                | 0.553780  | -0.146430 |
| 6             | 6             | 0           | 5.736535                | -0.487022 | 0.149470  |
| 7             | 6             | 0           | 0.821179                | -1.018168 | 1.540942  |
| 8             | 8             | 0           | 0.565998                | 0.747504  | -1.725999 |
| 9             | 29            | 0           | -0.791653               | 0.751701  | -0.478563 |
| 10            | 8             | 0           | 0.077553                | 2.388199  | 0.409451  |
| 11            | 6             | 0           | -0.834317               | 3.452085  | 0.716036  |
| 12            | 8             | 0           | -2.255877               | 0.500830  | 0.845599  |
| 13            | 16            | 0           | -2.845312               | -0.740854 | 0.148704  |
| 14            | 8             | 0           | -2.613368               | -1.949268 | 0.962013  |
| 15            | 8             | 0           | -1.968736               | -0.773807 | -1.123247 |
| 16            | 8             | 0           | -4.258378               | -0.526562 | -0.199273 |
| 17            | 1             | 0           | -0.218385               | -2.013280 | -0.857130 |
| 18            | 1             | 0           | 0.357990                | 0.049127  | -2.357453 |
| 19            | 1             | 0           | 0.302878                | -3.285724 | 0.201090  |
| 20            | 1             | 0           | 1.272245                | -2.933010 | -1.296040 |
| 21            | 1             | 0           | 1.454140                | -1.447174 | 2.337339  |
| 22            | 1             | 0           | 0.929141                | 0.067955  | 1.648160  |
| 23            | 1             | 0           | -0.210719               | -1.343983 | 1.689534  |
| 24            | 1             | 0           | 3.322006                | -1.940972 | 0.114203  |
| 25            | 1             | 0           | 2.744359                | -1.052484 | -1.251209 |
| 26            | 1             | 0           | 2.610311                | 1.045657  | 0.279198  |
| 27            | 1             | 0           | 3.405479                | 0.098134  | 1.539077  |

|    |   |   |           |           |           |
|----|---|---|-----------|-----------|-----------|
| 28 | 1 | 0 | 4.985468  | 1.527351  | 0.249118  |
| 29 | 1 | 0 | 4.563465  | 0.685572  | -1.233710 |
| 30 | 1 | 0 | 6.716767  | -0.169717 | -0.221882 |
| 31 | 1 | 0 | 5.827032  | -0.658026 | 1.230076  |
| 32 | 1 | 0 | 5.509175  | -1.452388 | -0.319757 |
| 33 | 1 | 0 | 0.699851  | 2.692620  | -0.267941 |
| 34 | 1 | 0 | -0.280391 | 4.333988  | 1.047937  |
| 35 | 1 | 0 | -1.450937 | 3.702574  | -0.153459 |
| 36 | 1 | 0 | -1.474617 | 3.098952  | 1.525327  |

## INTe-aS

| Center<br>Number | Atomic<br>Number | Atomic<br>Type | Coordinates (Angstroms) |           |           |
|------------------|------------------|----------------|-------------------------|-----------|-----------|
|                  |                  |                | X                       | Y         | Z         |
| 1                | 6                | 0              | -2.145253               | -2.124208 | 1.574123  |
| 2                | 6                | 0              | -2.492604               | -1.390770 | 0.371812  |
| 3                | 6                | 0              | -2.913110               | -2.103900 | -0.821677 |
| 4                | 6                | 0              | -2.328361               | 0.058001  | 0.368560  |
| 5                | 6                | 0              | -1.960229               | 0.747888  | -0.940461 |
| 6                | 6                | 0              | -1.906769               | 2.263020  | -0.778326 |
| 7                | 6                | 0              | -3.271828               | 2.895869  | -0.560675 |
| 8                | 8                | 0              | 0.920375                | -1.321950 | 0.971907  |
| 9                | 29               | 0              | 1.033394                | 0.655324  | 0.502339  |
| 10               | 8                | 0              | 1.623235                | -0.400720 | -1.086839 |
| 11               | 16               | 0              | 1.372766                | -1.772408 | -0.432541 |
| 12               | 8                | 0              | 0.278501                | -2.482194 | -1.122493 |
| 13               | 8                | 0              | 2.615975                | -2.556098 | -0.355082 |
| 14               | 8                | 0              | 1.492490                | 2.485764  | -0.303272 |
| 15               | 6                | 0              | 2.900135                | 2.641557  | -0.534667 |
| 16               | 8                | 0              | 0.389120                | 1.441823  | 2.041972  |
| 17               | 1                | 0              | -1.047068               | -2.249024 | 1.447197  |
| 18               | 1                | 0              | 0.219486                | 0.718441  | 2.656866  |
| 19               | 1                | 0              | -2.605571               | -3.109622 | 1.648954  |
| 20               | 1                | 0              | -2.259897               | -1.522906 | 2.481222  |
| 21               | 1                | 0              | -3.528594               | -1.501584 | -1.493519 |
| 22               | 1                | 0              | -1.948967               | -2.273143 | -1.343532 |
| 23               | 1                | 0              | -3.349423               | -3.080522 | -0.607636 |
| 24               | 1                | 0              | -3.347661               | 0.364918  | 0.693512  |
| 25               | 1                | 0              | -1.665305               | 0.373878  | 1.189580  |
| 26               | 1                | 0              | -0.978877               | 0.366562  | -1.263020 |
| 27               | 1                | 0              | -2.674235               | 0.491163  | -1.734832 |
| 28               | 1                | 0              | -1.439108               | 2.691906  | -1.674732 |
| 29               | 1                | 0              | -1.242248               | 2.509529  | 0.063319  |
| 30               | 1                | 0              | -3.200027               | 3.987320  | -0.502405 |
| 31               | 1                | 0              | -3.955250               | 2.648274  | -1.383382 |
| 32               | 1                | 0              | -3.738829               | 2.552989  | 0.371714  |
| 33               | 1                | 0              | 1.220852                | 3.115580  | 0.380887  |
| 34               | 1                | 0              | 3.112062                | 3.658629  | -0.874935 |
| 35               | 1                | 0              | 3.473569                | 2.422533  | 0.372742  |
| 36               | 1                | 0              | 3.172951                | 1.931456  | -1.316846 |

## TS2e-aS

| Center<br>Number | Atomic<br>Number | Atomic<br>Type | Coordinates (Angstroms) |           |           |
|------------------|------------------|----------------|-------------------------|-----------|-----------|
|                  |                  |                | X                       | Y         | Z         |
| 1                | 6                | 0              | 0.698226                | -2.429447 | -1.628530 |
| 2                | 6                | 0              | 1.545903                | -2.193492 | -0.562152 |
| 3                | 6                | 0              | 2.297865                | -0.915528 | -0.479055 |
| 4                | 6                | 0              | 2.158212                | -0.179759 | 0.856462  |
| 5                | 6                | 0              | 2.818157                | 1.193232  | 0.828176  |
| 6                | 6                | 0              | 4.330438                | 1.131842  | 0.685030  |
| 7                | 6                | 0              | 1.662599                | -3.157962 | 0.553007  |
| 8                | 8                | 0              | -1.330631               | -0.908651 | -0.895844 |
| 9                | 16               | 0              | -2.028890               | -1.067139 | 0.521438  |



|    |    |   |           |           |           |
|----|----|---|-----------|-----------|-----------|
| 10 | 8  | 0 | -3.459472 | -1.307110 | 0.324696  |
| 11 | 29 | 0 | -0.665893 | 1.006235  | -0.466916 |
| 12 | 8  | 0 | -0.234430 | 2.813551  | 0.384016  |
| 13 | 6  | 0 | -1.386439 | 3.671141  | 0.369029  |
| 14 | 8  | 0 | 0.265607  | 1.456121  | -1.983975 |
| 15 | 8  | 0 | -1.755836 | 0.330560  | 1.072698  |
| 16 | 8  | 0 | -1.321419 | -2.105703 | 1.276998  |
| 17 | 1  | 0 | -0.274728 | -1.733320 | -1.106474 |
| 18 | 1  | 0 | 0.182892  | 0.707275  | -2.586809 |
| 19 | 1  | 0 | 0.285625  | -3.428774 | -1.762679 |
| 20 | 1  | 0 | 0.824686  | -1.824353 | -2.529009 |
| 21 | 1  | 0 | 2.725765  | -3.369717 | 0.726090  |
| 22 | 1  | 0 | 1.284762  | -2.711661 | 1.480791  |
| 23 | 1  | 0 | 1.125240  | -4.087813 | 0.356448  |
| 24 | 1  | 0 | 3.355211  | -1.180287 | -0.646333 |
| 25 | 1  | 0 | 1.992047  | -0.252536 | -1.300721 |
| 26 | 1  | 0 | 1.087413  | -0.075340 | 1.097151  |
| 27 | 1  | 0 | 2.597253  | -0.778466 | 1.667577  |
| 28 | 1  | 0 | 2.555924  | 1.725827  | 1.752369  |
| 29 | 1  | 0 | 2.390225  | 1.780823  | 0.001202  |
| 30 | 1  | 0 | 4.778318  | 2.129439  | 0.747040  |
| 31 | 1  | 0 | 4.773148  | 0.515996  | 1.478687  |
| 32 | 1  | 0 | 4.631696  | 0.698715  | -0.276662 |
| 33 | 1  | 0 | 0.441975  | 3.199199  | -0.192431 |
| 34 | 1  | 0 | -1.129064 | 4.648365  | 0.785174  |
| 35 | 1  | 0 | -1.773326 | 3.785996  | -0.649121 |
| 36 | 1  | 0 | -2.142266 | 3.193764  | 0.994761  |

## PCe-aS

| Center<br>Number | Atomic<br>Number | Atomic<br>Type | Coordinates (Angstroms) |           |           |
|------------------|------------------|----------------|-------------------------|-----------|-----------|
|                  |                  |                | X                       | Y         | Z         |
| 1                | 6                | 0              | 0.749055                | -3.028084 | -0.127644 |
| 2                | 6                | 0              | 1.377382                | -2.043989 | 0.536461  |
| 3                | 6                | 0              | 2.713869                | -1.525664 | 0.090790  |
| 4                | 6                | 0              | 2.784737                | -0.006982 | -0.052828 |
| 5                | 6                | 0              | 4.077028                | 0.477250  | -0.699085 |
| 6                | 6                | 0              | 5.323207                | 0.144944  | 0.107223  |
| 7                | 6                | 0              | 0.799545                | -1.431055 | 1.774890  |
| 8                | 8                | 0              | -1.254681               | -0.948470 | -1.120067 |
| 9                | 16               | 0              | -2.531555               | -0.938596 | -0.062136 |
| 10               | 8                | 0              | -3.707642               | -0.842219 | -0.911206 |
| 11               | 29               | 0              | -0.720133               | 1.113142  | -0.434648 |
| 12               | 8                | 0              | -0.069226               | 2.485396  | 0.931277  |
| 13               | 6                | 0              | -1.108988               | 3.326195  | 1.453701  |
| 14               | 8                | 0              | 0.331839                | 1.825121  | -1.739398 |
| 15               | 8                | 0              | -2.208726               | 0.353138  | 0.652508  |
| 16               | 8                | 0              | -2.411641               | -2.114465 | 0.786755  |
| 17               | 1                | 0              | -0.538360               | -1.553773 | -0.788062 |
| 18               | 1                | 0              | 0.606318                | 1.096065  | -2.310089 |
| 19               | 1                | 0              | -0.185325               | -3.454308 | 0.237651  |
| 20               | 1                | 0              | 1.183639                | -3.472514 | -1.021775 |
| 21               | 1                | 0              | 1.545107                | -1.412220 | 2.580712  |
| 22               | 1                | 0              | 0.511507                | -0.383956 | 1.596926  |
| 23               | 1                | 0              | -0.087679               | -1.969892 | 2.120257  |
| 24               | 1                | 0              | 3.459110                | -1.849809 | 0.835540  |
| 25               | 1                | 0              | 2.995747                | -2.000563 | -0.860742 |
| 26               | 1                | 0              | 1.931423                | 0.341064  | -0.654589 |
| 27               | 1                | 0              | 2.679326                | 0.465667  | 0.936649  |
| 28               | 1                | 0              | 4.012201                | 1.565001  | -0.841967 |
| 29               | 1                | 0              | 4.161068                | 0.042412  | -1.706904 |
| 30               | 1                | 0              | 6.220560                | 0.586496  | -0.340093 |
| 31               | 1                | 0              | 5.238119                | 0.527155  | 1.133252  |
| 32               | 1                | 0              | 5.488713                | -0.937310 | 0.172143  |
| 33               | 1                | 0              | 0.552568                | 3.028723  | 0.423494  |
| 34               | 1                | 0              | -0.674356               | 4.088994  | 2.104453  |
| 35               | 1                | 0              | -1.674227               | 3.800393  | 0.645287  |
| 36               | 1                | 0              | -1.771114               | 2.685111  | 2.036832  |

**2e-aS**

| Center Number | Atomic Number | Atomic Type | Coordinates (Angstroms) |           |           |
|---------------|---------------|-------------|-------------------------|-----------|-----------|
|               |               |             | X                       | Y         | Z         |
| 1             | 6             | 0           | 2.505007                | -1.108338 | -0.059751 |
| 2             | 6             | 0           | 1.622378                | -0.109576 | -0.149472 |
| 3             | 6             | 0           | 2.032931                | 1.324533  | -0.009017 |
| 4             | 6             | 0           | 0.162094                | -0.365847 | -0.393226 |
| 5             | 6             | 0           | -0.741312               | 0.137791  | 0.733409  |
| 6             | 6             | 0           | -2.189480               | -0.314350 | 0.591827  |
| 7             | 6             | 0           | -2.867230               | 0.203308  | -0.667350 |
| 8             | 1             | 0           | 3.563431                | -0.919607 | 0.114666  |
| 9             | 1             | 0           | 2.198123                | -2.148564 | -0.159307 |
| 10            | 1             | 0           | 1.676660                | 1.917505  | -0.862475 |
| 11            | 1             | 0           | 1.590335                | 1.778353  | 0.887512  |
| 12            | 1             | 0           | 3.120168                | 1.430881  | 0.060009  |
| 13            | 1             | 0           | -0.130925               | 0.125510  | -1.335086 |
| 14            | 1             | 0           | -0.004434               | -1.444453 | -0.534663 |
| 15            | 1             | 0           | -0.337814               | -0.215452 | 1.694144  |
| 16            | 1             | 0           | -0.709382               | 1.237749  | 0.770225  |
| 17            | 1             | 0           | -2.753617               | 0.019789  | 1.473427  |
| 18            | 1             | 0           | -2.226270               | -1.414408 | 0.605858  |
| 19            | 1             | 0           | -3.929352               | -0.063912 | -0.690681 |
| 20            | 1             | 0           | -2.796503               | 1.297491  | -0.727676 |
| 21            | 1             | 0           | -2.406758               | -0.206009 | -1.574467 |

**RCe-Sz**

| Center Number | Atomic Number | Atomic Type | Coordinates (Angstroms) |           |           |
|---------------|---------------|-------------|-------------------------|-----------|-----------|
|               |               |             | X                       | Y         | Z         |
| 1             | 6             | 0           | 3.836544                | 0.102138  | 0.216415  |
| 2             | 6             | 0           | 2.517355                | 0.193993  | 0.961034  |
| 3             | 6             | 0           | 1.770478                | -1.133382 | 1.000195  |
| 4             | 6             | 0           | 1.358229                | -1.741248 | -0.334091 |
| 5             | 6             | 0           | 0.382751                | -2.897939 | -0.159914 |
| 6             | 6             | 0           | -0.293138               | -3.277987 | -1.466252 |
| 7             | 6             | 0           | 2.705734                | 0.729703  | 2.367097  |
| 8             | 8             | 0           | 1.675382                | 1.146556  | 0.224868  |
| 9             | 29            | 0           | -0.247273               | 0.984513  | -0.264531 |
| 10            | 8             | 0           | 0.163879                | 1.805651  | -2.072667 |
| 11            | 6             | 0           | 0.748449                | 0.887327  | -3.011253 |
| 12            | 8             | 0           | -2.088551               | 0.519767  | -0.738364 |
| 13            | 16            | 0           | -2.478939               | 0.057274  | 0.691336  |
| 14            | 8             | 0           | -2.779731               | -1.379903 | 0.701510  |
| 15            | 8             | 0           | -1.130238               | 0.349953  | 1.392964  |
| 16            | 8             | 0           | -3.546985               | 0.901858  | 1.237794  |
| 17            | 1             | 0           | 0.871558                | -0.992079 | 1.615965  |
| 18            | 1             | 0           | 1.974727                | 2.051459  | 0.390847  |
| 19            | 1             | 0           | 2.410880                | -1.843219 | 1.544151  |
| 20            | 1             | 0           | 3.317797                | 0.036524  | 2.954766  |
| 21            | 1             | 0           | 3.216396                | 1.700682  | 2.352480  |
| 22            | 1             | 0           | 1.736511                | 0.846570  | 2.866721  |
| 23            | 1             | 0           | 4.490823                | -0.626839 | 0.708797  |
| 24            | 1             | 0           | 3.683996                | -0.214800 | -0.821394 |
| 25            | 1             | 0           | 4.348621                | 1.071854  | 0.212377  |
| 26            | 1             | 0           | 0.874278                | -0.990146 | -0.981137 |
| 27            | 1             | 0           | 2.238239                | -2.075547 | -0.904420 |
| 28            | 1             | 0           | 0.907555                | -3.761535 | 0.274131  |
| 29            | 1             | 0           | -0.385515               | -2.605548 | 0.572354  |
| 30            | 1             | 0           | -0.947256               | -4.149503 | -1.354479 |
| 31            | 1             | 0           | -0.910129               | -2.443202 | -1.828725 |
| 32            | 1             | 0           | 0.444404                | -3.508557 | -2.246216 |
| 33            | 1             | 0           | -0.672497               | 2.128400  | -2.440840 |
| 34            | 1             | 0           | 0.128661                | -0.011095 | -3.117187 |
| 35            | 1             | 0           | 0.866914                | 1.378212  | -3.979891 |

|    |   |   |          |          |           |
|----|---|---|----------|----------|-----------|
| 36 | 1 | 0 | 1.729520 | 0.614431 | -2.616486 |
|----|---|---|----------|----------|-----------|

---

### TS1e-Sz

| Center Number | Atomic Number | Atomic Type | Coordinates (Angstroms) |           |           |
|---------------|---------------|-------------|-------------------------|-----------|-----------|
|               |               |             | X                       | Y         | Z         |
| 1             | 6             | 0           | -0.222391               | 1.796365  | 1.614150  |
| 2             | 6             | 0           | -0.888013               | 2.486866  | 0.516216  |
| 3             | 6             | 0           | -0.415444               | 3.810303  | 0.132966  |
| 4             | 6             | 0           | -1.944614               | 1.848987  | -0.249722 |
| 5             | 6             | 0           | -2.797688               | 0.773892  | 0.407810  |
| 6             | 6             | 0           | -3.724423               | 0.110020  | -0.599728 |
| 7             | 6             | 0           | -4.529072               | -1.011577 | 0.033878  |
| 8             | 8             | 0           | 1.042989                | 1.489765  | -1.582877 |
| 9             | 29            | 0           | 1.422628                | 0.003943  | -0.550930 |
| 10            | 8             | 0           | 1.427077                | -1.650048 | 0.537868  |
| 11            | 16            | 0           | -0.002383               | -2.091040 | 0.150145  |
| 12            | 8             | 0           | 0.016477                | -3.405014 | -0.516212 |
| 13            | 8             | 0           | -0.360821               | -0.975813 | -0.845141 |
| 14            | 8             | 0           | -0.883086               | -2.050332 | 1.335311  |
| 15            | 1             | 0           | -1.288280               | 1.369064  | -1.017993 |
| 16            | 1             | 0           | 1.851153                | 2.015465  | -1.611986 |
| 17            | 1             | 0           | -2.537218               | 2.589706  | -0.799507 |
| 18            | 1             | 0           | 0.109983                | 4.324357  | 0.941616  |
| 19            | 1             | 0           | 0.342458                | 3.556433  | -0.636189 |
| 20            | 1             | 0           | -1.180410               | 4.430635  | -0.339220 |
| 21            | 1             | 0           | -0.808008               | 2.097559  | 2.503762  |
| 22            | 1             | 0           | -0.284392               | 0.706034  | 1.558398  |
| 23            | 1             | 0           | 0.798589                | 2.156120  | 1.774090  |
| 24            | 1             | 0           | -2.160149               | 0.002893  | 0.857471  |
| 25            | 1             | 0           | -3.384998               | 1.224157  | 1.221161  |
| 26            | 1             | 0           | -4.395206               | 0.862873  | -1.039807 |
| 27            | 1             | 0           | -3.119741               | -0.286272 | -1.429397 |
| 28            | 1             | 0           | -5.195530               | -1.494220 | -0.688945 |
| 29            | 1             | 0           | -3.860777               | -1.781216 | 0.442281  |
| 30            | 1             | 0           | -5.145951               | -0.637141 | 0.861074  |
| 31            | 8             | 0           | 3.372902                | 0.544257  | -0.197873 |
| 32            | 1             | 0           | 3.929651                | 0.132170  | -0.874606 |
| 33            | 6             | 0           | 3.884882                | 0.198563  | 1.096557  |
| 34            | 1             | 0           | 3.947774                | -0.886620 | 1.223606  |
| 35            | 1             | 0           | 4.871451                | 0.649683  | 1.235587  |
| 36            | 1             | 0           | 3.187787                | 0.607575  | 1.831888  |

---

### INTe-Sz

| Center Number | Atomic Number | Atomic Type | Coordinates (Angstroms) |           |           |
|---------------|---------------|-------------|-------------------------|-----------|-----------|
|               |               |             | X                       | Y         | Z         |
| 1             | 6             | 0           | -1.223437               | 2.265909  | 1.422653  |
| 2             | 6             | 0           | -1.557196               | 2.275782  | 0.000933  |
| 3             | 6             | 0           | -0.777331               | 3.090627  | -0.898314 |
| 4             | 6             | 0           | -2.650409               | 1.459546  | -0.523517 |
| 5             | 6             | 0           | -3.299240               | 0.427484  | 0.379738  |
| 6             | 6             | 0           | -4.087929               | -0.601674 | -0.416178 |
| 7             | 6             | 0           | -4.745933               | -1.630609 | 0.486272  |
| 8             | 8             | 0           | 2.056331                | 2.009719  | -0.430689 |
| 9             | 29            | 0           | 1.861525                | 0.209327  | 0.010674  |
| 10            | 8             | 0           | 1.462987                | -1.713619 | 0.270201  |
| 11            | 16            | 0           | -0.015883               | -1.612315 | -0.157948 |
| 12            | 8             | 0           | -0.285275               | -2.453885 | -1.335462 |
| 13            | 8             | 0           | -0.072068               | -0.117775 | -0.533565 |
| 14            | 8             | 0           | -0.900059               | -1.905783 | 0.985281  |
| 15            | 1             | 0           | -2.293099               | 1.021672  | -1.470083 |
| 16            | 1             | 0           | 2.069042                | 2.484582  | 0.410003  |
| 17            | 1             | 0           | -3.383876               | 2.212559  | -0.874401 |

|    |   |   |           |           |           |
|----|---|---|-----------|-----------|-----------|
| 18 | 1 | 0 | -0.648632 | 4.101263  | -0.492003 |
| 19 | 1 | 0 | 0.261109  | 2.660116  | -0.842860 |
| 20 | 1 | 0 | -1.137647 | 3.096219  | -1.928050 |
| 21 | 1 | 0 | -2.130708 | 2.368632  | 2.030287  |
| 22 | 1 | 0 | -0.841645 | 1.255691  | 1.644767  |
| 23 | 1 | 0 | -0.473908 | 3.010081  | 1.695523  |
| 24 | 1 | 0 | -2.529458 | -0.103946 | 0.954861  |
| 25 | 1 | 0 | -3.956704 | 0.922571  | 1.108978  |
| 26 | 1 | 0 | -4.842204 | -0.096031 | -1.037349 |
| 27 | 1 | 0 | -3.399727 | -1.104535 | -1.114169 |
| 28 | 1 | 0 | -5.309012 | -2.375629 | -0.085843 |
| 29 | 1 | 0 | -3.989785 | -2.163004 | 1.077428  |
| 30 | 1 | 0 | -5.439690 | -1.152664 | 1.189624  |
| 31 | 8 | 0 | 3.794593  | 0.129607  | 0.676560  |
| 32 | 1 | 0 | 4.103373  | 1.001681  | 0.385146  |
| 33 | 6 | 0 | 4.581442  | -0.880709 | 0.028439  |
| 34 | 1 | 0 | 4.452255  | -0.841683 | -1.058444 |
| 35 | 1 | 0 | 5.635976  | -0.750837 | 0.284302  |
| 36 | 1 | 0 | 4.232387  | -1.844450 | 0.401144  |

### TS2e-Sz

| Center<br>Number | Atomic<br>Number | Atomic<br>Type | Coordinates (Angstroms) |           |           |
|------------------|------------------|----------------|-------------------------|-----------|-----------|
|                  |                  |                | X                       | Y         | Z         |
| 1                | 6                | 0              | -1.208087               | 2.462157  | 1.376713  |
| 2                | 6                | 0              | -1.550749               | 2.333751  | -0.064117 |
| 3                | 6                | 0              | -0.838684               | 3.210619  | -1.016756 |
| 4                | 6                | 0              | -2.390633               | 1.331481  | -0.509261 |
| 5                | 6                | 0              | -3.274955               | 0.498777  | 0.384457  |
| 6                | 6                | 0              | -3.858169               | -0.701322 | -0.348908 |
| 7                | 6                | 0              | -4.665323               | -1.595930 | 0.574150  |
| 8                | 8                | 0              | 2.161270                | 1.977949  | -0.358642 |
| 9                | 29               | 0              | 1.851105                | 0.198283  | 0.018670  |
| 10               | 8                | 0              | 1.352797                | -1.710823 | 0.238079  |
| 11               | 16               | 0              | -0.113778               | -1.616686 | -0.183959 |
| 12               | 8                | 0              | -0.412284               | -2.479522 | -1.331103 |
| 13               | 8                | 0              | -0.118075               | -0.107438 | -0.643151 |
| 14               | 8                | 0              | -1.015445               | -1.789475 | 0.961318  |
| 15               | 1                | 0              | -1.243826               | 0.672731  | -0.577974 |
| 16               | 1                | 0              | 1.976936                | 2.459109  | 0.457355  |
| 17               | 1                | 0              | -2.678163               | 1.379359  | -1.564076 |
| 18               | 1                | 0              | -0.978541               | 4.255557  | -0.714312 |
| 19               | 1                | 0              | 0.241576                | 3.002552  | -0.935127 |
| 20               | 1                | 0              | -1.169168               | 3.075917  | -2.049472 |
| 21               | 1                | 0              | -2.106327               | 2.716196  | 1.952573  |
| 22               | 1                | 0              | -0.849519               | 1.499224  | 1.765392  |
| 23               | 1                | 0              | -0.441157               | 3.221393  | 1.547250  |
| 24               | 1                | 0              | -2.713703               | 0.153510  | 1.264831  |
| 25               | 1                | 0              | -4.091654               | 1.128468  | 0.771662  |
| 26               | 1                | 0              | -4.483865               | -0.345764 | -1.180787 |
| 27               | 1                | 0              | -3.040737               | -1.277641 | -0.807642 |
| 28               | 1                | 0              | -5.112125               | -2.439118 | 0.036769  |
| 29               | 1                | 0              | -4.029431               | -2.004843 | 1.369871  |
| 30               | 1                | 0              | -5.477668               | -1.035894 | 1.054998  |
| 31               | 8                | 0              | 3.734901                | -0.012073 | 0.768127  |
| 32               | 1                | 0              | 4.075411                | 0.877904  | 0.583967  |
| 33               | 6                | 0              | 4.530597                | -0.970408 | 0.053628  |
| 34               | 1                | 0              | 4.472042                | -0.800359 | -1.026439 |
| 35               | 1                | 0              | 5.569741                | -0.908696 | 0.386618  |
| 36               | 1                | 0              | 4.129291                | -1.956527 | 0.290015  |

### PCe-Sz

| Center<br>Number | Atomic<br>Number | Atomic<br>Type | Coordinates (Angstroms) |   |   |
|------------------|------------------|----------------|-------------------------|---|---|
|                  |                  |                | X                       | Y | Z |

|    |    |   |           |           |           |
|----|----|---|-----------|-----------|-----------|
| 1  | 6  | 0 | -0.605571 | 1.761920  | 1.689208  |
| 2  | 6  | 0 | -1.119807 | 2.172627  | 0.342671  |
| 3  | 6  | 0 | -2.308490 | 1.804889  | -0.173116 |
| 4  | 6  | 0 | -3.379473 | 0.964188  | 0.446554  |
| 5  | 6  | 0 | -3.953924 | -0.064743 | -0.524325 |
| 6  | 6  | 0 | -5.011451 | -0.936117 | 0.129642  |
| 7  | 6  | 0 | -0.204950 | 3.084265  | -0.419161 |
| 8  | 8  | 0 | 2.470554  | 1.227480  | -1.621360 |
| 9  | 29 | 0 | 1.833872  | 0.029334  | -0.408122 |
| 10 | 8  | 0 | 3.352949  | 0.490730  | 0.882179  |
| 11 | 6  | 0 | 4.297119  | -0.582302 | 1.030717  |
| 12 | 8  | 0 | 1.123212  | -1.526465 | 0.620719  |
| 13 | 16 | 0 | -0.242909 | -1.750173 | 0.017260  |
| 14 | 8  | 0 | -1.333187 | -1.539325 | 0.958745  |
| 15 | 8  | 0 | -0.242868 | -0.465658 | -1.035383 |
| 16 | 8  | 0 | -0.308443 | -2.929193 | -0.830391 |
| 17 | 1  | 0 | -0.837815 | 0.257774  | -0.699081 |
| 18 | 1  | 0 | 1.750517  | 1.406235  | -2.239649 |
| 19 | 1  | 0 | -2.556908 | 2.200273  | -1.163939 |
| 20 | 1  | 0 | -0.001695 | 3.994046  | 0.162397  |
| 21 | 1  | 0 | 0.770044  | 2.610306  | -0.606152 |
| 22 | 1  | 0 | -0.632487 | 3.381491  | -1.382832 |
| 23 | 1  | 0 | -0.460769 | 2.647045  | 2.323052  |
| 24 | 1  | 0 | -1.263499 | 1.066768  | 2.216839  |
| 25 | 1  | 0 | 0.384758  | 1.289823  | 1.595584  |
| 26 | 1  | 0 | -3.016312 | 0.451719  | 1.347395  |
| 27 | 1  | 0 | -4.202479 | 1.618384  | 0.780457  |
| 28 | 1  | 0 | -4.374256 | 0.458139  | -1.396318 |
| 29 | 1  | 0 | -3.139858 | -0.696677 | -0.910616 |
| 30 | 1  | 0 | -5.444606 | -1.653921 | -0.575265 |
| 31 | 1  | 0 | -4.581061 | -1.504746 | 0.964439  |
| 32 | 1  | 0 | -5.829924 | -0.326265 | 0.533612  |
| 33 | 1  | 0 | 3.794237  | 1.235859  | 0.446931  |
| 34 | 1  | 0 | 4.676234  | -0.906994 | 0.056318  |
| 35 | 1  | 0 | 5.125221  | -0.260252 | 1.666686  |
| 36 | 1  | 0 | 3.766456  | -1.405848 | 1.510306  |

## 2e-Sz

| Center Number | Atomic Number | Atomic Type | Coordinates (Angstroms) |           |           |
|---------------|---------------|-------------|-------------------------|-----------|-----------|
|               |               |             | X                       | Y         | Z         |
| 1             | 6             | 0           | -1.787641               | 1.454422  | -0.112643 |
| 2             | 6             | 0           | -1.566187               | -0.020015 | 0.036522  |
| 3             | 6             | 0           | -2.796298               | -0.848378 | -0.185913 |
| 4             | 6             | 0           | -0.394845               | -0.594551 | 0.343584  |
| 5             | 6             | 0           | 0.930889                | 0.055859  | 0.578992  |
| 6             | 6             | 0           | 1.991452                | -0.412087 | -0.416600 |
| 7             | 6             | 0           | 3.356237                | 0.191316  | -0.134685 |
| 8             | 1             | 0           | -0.381451               | -1.687406 | 0.413814  |
| 9             | 1             | 0           | -3.593186               | -0.564216 | 0.515554  |
| 10            | 1             | 0           | -3.203694               | -0.683037 | -1.193177 |
| 11            | 1             | 0           | -2.599756               | -1.919065 | -0.066468 |
| 12            | 1             | 0           | -2.540169               | 1.803728  | 0.607805  |
| 13            | 1             | 0           | -0.882135               | 2.050379  | 0.028756  |
| 14            | 1             | 0           | -2.191994               | 1.681017  | -1.108768 |
| 15            | 1             | 0           | 0.856123                | 1.151423  | 0.538932  |
| 16            | 1             | 0           | 1.284482                | -0.185862 | 1.595258  |
| 17            | 1             | 0           | 2.051678                | -1.510416 | -0.387430 |
| 18            | 1             | 0           | 1.664603                | -0.154514 | -1.434616 |
| 19            | 1             | 0           | 4.110365                | -0.147197 | -0.853403 |
| 20            | 1             | 0           | 3.318332                | 1.287134  | -0.181314 |
| 21            | 1             | 0           | 3.705165                | -0.081353 | 0.869523  |

## 1f-aS

| Center<br>Number | Atomic<br>Number | Atomic<br>Type | Coordinates (Angstroms) |           |           |
|------------------|------------------|----------------|-------------------------|-----------|-----------|
|                  |                  |                | X                       | Y         | Z         |
| 1                | 6                | 0              | 4.115937                | -0.401030 | 0.301541  |
| 2                | 6                | 0              | 2.710504                | 0.003277  | -0.024420 |
| 3                | 6                | 0              | 2.415700                | 1.457730  | 0.184399  |
| 4                | 6                | 0              | 1.810442                | -0.889174 | -0.458896 |
| 5                | 6                | 0              | 0.374723                | -0.608124 | -0.793076 |
| 6                | 6                | 0              | -0.528382               | -0.714387 | 0.433184  |
| 7                | 6                | 0              | -1.979762               | -0.287161 | 0.206466  |
| 8                | 8                | 0              | -2.620875               | -0.485846 | 1.466489  |
| 9                | 6                | 0              | -2.032731               | 1.144840  | -0.151096 |
| 10               | 6                | 0              | -2.075002               | 2.318678  | -0.440253 |
| 11               | 6                | 0              | -2.668061               | -1.122049 | -0.865799 |
| 12               | 1                | 0              | -2.577962               | -2.184086 | -0.610367 |
| 13               | 1                | 0              | -0.121894               | -0.093093 | 1.244243  |
| 14               | 1                | 0              | -0.549794               | -1.749726 | 0.802840  |
| 15               | 1                | 0              | 0.034976                | -1.316429 | -1.560343 |
| 16               | 1                | 0              | 0.265615                | 0.393962  | -1.232049 |
| 17               | 1                | 0              | 2.131338                | -1.930056 | -0.548079 |
| 18               | 1                | 0              | 4.285233                | -1.470384 | 0.137076  |
| 19               | 1                | 0              | 4.836608                | 0.159993  | -0.309669 |
| 20               | 1                | 0              | 4.358195                | -0.170322 | 1.348220  |
| 21               | 1                | 0              | 1.383161                | 1.731823  | -0.053955 |
| 22               | 1                | 0              | 2.603579                | 1.735411  | 1.230797  |
| 23               | 1                | 0              | 3.087099                | 2.081370  | -0.421797 |
| 24               | 1                | 0              | -2.120854               | 3.357274  | -0.691098 |
| 25               | 1                | 0              | -3.554304               | -0.258480 | 1.358406  |
| 26               | 1                | 0              | -3.730686               | -0.861537 | -0.926410 |
| 27               | 1                | 0              | -2.223523               | -0.954555 | -1.852020 |

### RCf-aS

| Center<br>Number | Atomic<br>Number | Atomic<br>Type | Coordinates (Angstroms) |           |           |
|------------------|------------------|----------------|-------------------------|-----------|-----------|
|                  |                  |                | X                       | Y         | Z         |
| 1                | 6                | 0              | 5.230715                | -2.503141 | -1.087937 |
| 2                | 6                | 0              | 4.588236                | -1.197269 | -0.731303 |
| 3                | 6                | 0              | 3.626056                | -0.661605 | -1.495766 |
| 4                | 6                | 0              | 2.898453                | 0.623286  | -1.225672 |
| 5                | 6                | 0              | 1.694331                | 0.404030  | -0.309683 |
| 6                | 6                | 0              | 0.998661                | 1.690831  | 0.129258  |
| 7                | 6                | 0              | 1.926270                | 2.546345  | 0.881318  |
| 8                | 6                | 0              | 2.697859                | 3.248264  | 1.492464  |
| 9                | 6                | 0              | 5.104963                | -0.571890 | 0.529072  |
| 10               | 6                | 0              | 0.367155                | 2.448353  | -1.025583 |
| 11               | 8                | 0              | -0.042878               | 1.276703  | 1.068504  |
| 12               | 29               | 0              | -1.380859               | -0.154986 | 0.551380  |
| 13               | 8                | 0              | -0.290375               | -1.494262 | 1.549894  |
| 14               | 6                | 0              | -0.968896               | -2.624328 | 2.119538  |
| 15               | 8                | 0              | -2.645379               | 0.966726  | -0.449379 |
| 16               | 16               | 0              | -3.624857               | -0.194928 | -0.758304 |
| 17               | 8                | 0              | -3.688324               | -0.455144 | -2.200714 |
| 18               | 8                | 0              | -2.854664               | -1.323724 | -0.026891 |
| 19               | 8                | 0              | -4.928534               | 0.040721  | -0.127693 |
| 20               | 1                | 0              | -0.299549               | 1.781294  | -1.583028 |
| 21               | 1                | 0              | 2.015435                | -0.132699 | 0.594024  |
| 22               | 1                | 0              | 0.956520                | -0.229998 | -0.824664 |
| 23               | 1                | 0              | 2.561765                | 1.058944  | -2.175319 |
| 24               | 1                | 0              | 3.569887                | 1.362606  | -0.767570 |
| 25               | 1                | 0              | 3.310666                | -1.218565 | -2.381336 |
| 26               | 1                | 0              | 4.822145                | -2.924181 | -2.012719 |
| 27               | 1                | 0              | 6.315994                | -2.383598 | -1.212835 |
| 28               | 1                | 0              | 5.094803                | -3.239492 | -0.283697 |
| 29               | 1                | 0              | 4.630190                | 0.385110  | 0.768558  |
| 30               | 1                | 0              | 4.945364                | -1.248630 | 1.380128  |
| 31               | 1                | 0              | 6.190181                | -0.412257 | 0.465681  |
| 32               | 1                | 0              | 3.375254                | 3.873905  | 2.034193  |
| 33               | 1                | 0              | -0.536166               | 2.064324  | 1.350030  |
| 34               | 1                | 0              | -0.209094               | 3.302947  | -0.655396 |

|    |   |   |           |           |           |
|----|---|---|-----------|-----------|-----------|
| 35 | 1 | 0 | 1.138892  | 2.829631  | -1.701308 |
| 36 | 1 | 0 | 0.192129  | -1.023624 | 2.245333  |
| 37 | 1 | 0 | -0.242465 | -3.268602 | 2.620010  |
| 38 | 1 | 0 | -1.740434 | -2.304305 | 2.825693  |
| 39 | 1 | 0 | -1.430474 | -3.164785 | 1.293069  |

### TS1f-aS

| Center Number | Atomic Number | Atomic Type | Coordinates (Angstroms) |           |           |
|---------------|---------------|-------------|-------------------------|-----------|-----------|
|               |               |             | X                       | Y         | Z         |
| 1             | 6             | 0           | 4.117069                | -2.655798 | -0.709847 |
| 2             | 6             | 0           | 3.703189                | -1.219329 | -0.632247 |
| 3             | 6             | 0           | 4.212585                | -0.478935 | 0.564926  |
| 4             | 6             | 0           | 2.912039                | -0.674747 | -1.570434 |
| 5             | 6             | 0           | 2.407682                | 0.732154  | -1.567522 |
| 6             | 6             | 0           | 1.140566                | 0.808998  | -0.644746 |
| 7             | 6             | 0           | 0.579356                | 2.163234  | -0.669740 |
| 8             | 6             | 0           | -0.545996               | 2.473161  | -1.544980 |
| 9             | 6             | 0           | 1.185244                | 3.160596  | 0.084245  |
| 10            | 6             | 0           | 1.745011                | 4.031271  | 0.723197  |
| 11            | 8             | 0           | -0.900729               | 1.543312  | 1.999940  |
| 12            | 29            | 0           | -1.214995               | -0.050738 | 1.130522  |
| 13            | 8             | 0           | -2.759789               | 0.523537  | -0.062478 |
| 14            | 16            | 0           | -2.752956               | -0.803060 | -0.854408 |
| 15            | 8             | 0           | -4.060912               | -1.470900 | -0.759818 |
| 16            | 8             | 0           | -1.681105               | -1.578607 | -0.063894 |
| 17            | 8             | 0           | -2.305273               | -0.573348 | -2.239593 |
| 18            | 1             | 0           | -1.421032               | 1.936163  | -1.125273 |
| 19            | 1             | 0           | 1.458887                | 0.546687  | 0.370827  |
| 20            | 1             | 0           | 0.400974                | 0.088787  | -1.015814 |
| 21            | 1             | 0           | 2.123773                | 1.048253  | -2.576813 |
| 22            | 1             | 0           | 3.155394                | 1.441118  | -1.193905 |
| 23            | 1             | 0           | 2.553489                | -1.312257 | -2.380726 |
| 24            | 1             | 0           | 3.701363                | -3.157802 | -1.589427 |
| 25            | 1             | 0           | 5.211246                | -2.746749 | -0.740595 |
| 26            | 1             | 0           | 3.789171                | -3.200642 | 0.187039  |
| 27            | 1             | 0           | 4.005946                | 0.595558  | 0.538015  |
| 28            | 1             | 0           | 3.753736                | -0.884513 | 1.478890  |
| 29            | 1             | 0           | 5.295522                | -0.621106 | 0.675398  |
| 30            | 1             | 0           | 2.233109                | 4.802203  | 1.284404  |
| 31            | 1             | 0           | -1.612507               | 2.133797  | 1.726723  |
| 32            | 1             | 0           | -0.758412               | 3.537241  | -1.636067 |
| 33            | 1             | 0           | -0.383755               | 1.999182  | -2.523231 |
| 34            | 8             | 0           | 0.312952                | -0.976586 | 2.149522  |
| 35            | 1             | 0           | -0.001041               | -1.152299 | 3.047596  |
| 36            | 6             | 0           | 0.860502                | -2.181322 | 1.602599  |
| 37            | 1             | 0           | 1.675544                | -2.538323 | 2.239220  |
| 38            | 1             | 0           | 0.098046                | -2.959368 | 1.503213  |
| 39            | 1             | 0           | 1.258040                | -1.930548 | 0.613759  |

### INTf-aS

| Center Number | Atomic Number | Atomic Type | Coordinates (Angstroms) |           |           |
|---------------|---------------|-------------|-------------------------|-----------|-----------|
|               |               |             | X                       | Y         | Z         |
| 1             | 6             | 0           | 4.237243                | -2.492534 | -0.649363 |
| 2             | 6             | 0           | 3.723020                | -1.087936 | -0.596776 |
| 3             | 6             | 0           | 2.948327                | -0.595971 | -1.577103 |
| 4             | 6             | 0           | 2.366208                | 0.779625  | -1.607465 |
| 5             | 6             | 0           | 1.057097                | 0.800870  | -0.736819 |
| 6             | 6             | 0           | 0.471529                | 2.142041  | -0.759936 |
| 7             | 6             | 0           | 1.024412                | 3.124944  | 0.050952  |
| 8             | 6             | 0           | 1.528424                | 3.973977  | 0.761786  |
| 9             | 6             | 0           | 4.116031                | -0.316863 | 0.624550  |
| 10            | 6             | 0           | -0.649126               | 2.447481  | -1.638764 |

|    |    |   |           |           |           |
|----|----|---|-----------|-----------|-----------|
| 11 | 8  | 0 | -1.152194 | 1.397026  | 2.259595  |
| 12 | 29 | 0 | -1.226286 | -0.077210 | 1.166305  |
| 13 | 8  | 0 | 0.424875  | -0.887981 | 2.101945  |
| 14 | 6  | 0 | 0.953537  | -2.125355 | 1.614190  |
| 15 | 8  | 0 | -2.759519 | 0.439772  | -0.078416 |
| 16 | 16 | 0 | -2.641912 | -0.862773 | -0.899612 |
| 17 | 8  | 0 | -2.206960 | -0.568791 | -2.277160 |
| 18 | 8  | 0 | -1.516477 | -1.569993 | -0.120279 |
| 19 | 8  | 0 | -3.893759 | -1.634166 | -0.831282 |
| 20 | 1  | 0 | -1.518820 | 1.927985  | -1.182124 |
| 21 | 1  | 0 | 1.349017  | 0.535845  | 0.286820  |
| 22 | 1  | 0 | 0.350539  | 0.065480  | -1.140816 |
| 23 | 1  | 0 | 2.106800  | 1.074642  | -2.629396 |
| 24 | 1  | 0 | 3.059171  | 1.530000  | -1.209921 |
| 25 | 1  | 0 | 2.674676  | -1.254206 | -2.403543 |
| 26 | 1  | 0 | 3.899733  | -3.021684 | -1.546295 |
| 27 | 1  | 0 | 5.335360  | -2.507330 | -0.628276 |
| 28 | 1  | 0 | 3.906080  | -3.058775 | 0.232765  |
| 29 | 1  | 0 | 3.838351  | 0.741236  | 0.584660  |
| 30 | 1  | 0 | 3.635356  | -0.755535 | 1.511864  |
| 31 | 1  | 0 | 5.198317  | -0.385285 | 0.794754  |
| 32 | 1  | 0 | 1.965027  | 4.727545  | 1.385867  |
| 33 | 1  | 0 | -1.930244 | 1.923104  | 2.043199  |
| 34 | 1  | 0 | -0.859515 | 3.511055  | -1.740740 |
| 35 | 1  | 0 | -0.515140 | 1.948709  | -2.607230 |
| 36 | 1  | 0 | 0.215305  | -0.980237 | 3.041754  |
| 37 | 1  | 0 | 1.805747  | -2.430852 | 2.228707  |
| 38 | 1  | 0 | 0.193603  | -2.912418 | 1.612222  |
| 39 | 1  | 0 | 1.295569  | -1.944436 | 0.589937  |

## TS2f-aS

| Center<br>Number | Atomic<br>Number | Atomic<br>Type | Coordinates (Angstroms) |           |           |
|------------------|------------------|----------------|-------------------------|-----------|-----------|
|                  |                  |                | X                       | Y         | Z         |
| 1                | 6                | 0              | 2.249631                | -0.227053 | 0.243239  |
| 2                | 6                | 0              | 1.084557                | 0.456225  | 0.857831  |
| 3                | 6                | 0              | 0.771188                | 1.777574  | 0.556309  |
| 4                | 6                | 0              | 0.264628                | -0.275627 | 1.744892  |
| 5                | 6                | 0              | -0.464736               | -0.922159 | 2.467839  |
| 6                | 8                | 0              | -1.368278               | 1.262465  | -0.937071 |
| 7                | 16               | 0              | -2.682258               | 1.670459  | -0.156182 |
| 8                | 8                | 0              | -2.333462               | 2.540963  | 0.971367  |
| 9                | 29               | 0              | -1.655722               | -0.797405 | -0.462650 |
| 10               | 8                | 0              | -0.293854               | -1.491600 | -1.473001 |
| 11               | 8                | 0              | -3.131046               | 0.288511  | 0.320096  |
| 12               | 8                | 0              | -3.632124               | 2.247406  | -1.111152 |
| 13               | 1                | 0              | -0.209676               | 1.504274  | -0.224935 |
| 14               | 1                | 0              | 2.071604                | -1.301940 | 0.135931  |
| 15               | 1                | 0              | 2.444923                | 0.207199  | -0.744840 |
| 16               | 1                | 0              | -1.110760               | -1.484043 | 3.110641  |
| 17               | 1                | 0              | 0.069136                | -2.263296 | -1.022979 |
| 18               | 1                | 0              | 0.178388                | 2.340127  | 1.279552  |
| 19               | 8                | 0              | -2.433161               | -2.535552 | 0.319933  |
| 20               | 1                | 0              | -1.824635               | -3.269850 | 0.156332  |
| 21               | 6                | 0              | -3.702002               | -2.859301 | -0.268986 |
| 22               | 1                | 0              | -3.608516               | -2.994301 | -1.351520 |
| 23               | 1                | 0              | -4.102623               | -3.767683 | 0.188182  |
| 24               | 1                | 0              | -4.367877               | -2.020451 | -0.062442 |
| 25               | 6                | 0              | 3.488513                | 0.009828  | 1.145809  |
| 26               | 1                | 0              | 3.616993                | 1.091227  | 1.281695  |
| 27               | 1                | 0              | 3.286739                | -0.412586 | 2.138142  |
| 28               | 6                | 0              | 4.709221                | -0.619490 | 0.548972  |
| 29               | 6                | 0              | 5.545000                | -0.039700 | -0.324801 |
| 30               | 1                | 0              | 4.901996                | -1.656211 | 0.833796  |
| 31               | 6                | 0              | 6.731485                | -0.775697 | -0.867560 |
| 32               | 1                | 0              | 6.804934                | -1.792039 | -0.466801 |
| 33               | 1                | 0              | 6.683913                | -0.838120 | -1.963510 |
| 34               | 1                | 0              | 7.662526                | -0.242185 | -0.631235 |
| 35               | 6                | 0              | 5.386341                | 1.356745  | -0.842914 |
| 36               | 1                | 0              | 5.273228                | 1.342300  | -1.935669 |



|    |   |   |          |          |           |
|----|---|---|----------|----------|-----------|
| 37 | 1 | 0 | 4.523840 | 1.884292 | -0.424083 |
| 38 | 1 | 0 | 6.287479 | 1.950126 | -0.636588 |
| 39 | 1 | 0 | 1.502864 | 2.334961 | -0.029031 |

### PCf-aS

| Center Number | Atomic Number | Atomic Type | Coordinates (Angstroms) |           |           |
|---------------|---------------|-------------|-------------------------|-----------|-----------|
|               |               |             | X                       | Y         | Z         |
| 1             | 6             | 0           | -0.240503               | -2.026014 | 1.458504  |
| 2             | 6             | 0           | -0.652659               | -1.850286 | 0.190955  |
| 3             | 6             | 0           | -2.070014               | -1.578000 | -0.241954 |
| 4             | 6             | 0           | -3.024468               | -1.210912 | 0.889225  |
| 5             | 6             | 0           | -4.407986               | -0.955469 | 0.373637  |
| 6             | 6             | 0           | -4.942717               | 0.231751  | 0.054411  |
| 7             | 6             | 0           | -4.231431               | 1.543931  | 0.183320  |
| 8             | 6             | 0           | 0.313134                | -1.918384 | -0.867435 |
| 9             | 29            | 0           | 2.331647                | -0.619943 | -0.313104 |
| 10            | 8             | 0           | 3.095006                | -2.024588 | 0.580915  |
| 11            | 6             | 0           | 1.104902                | -1.966054 | -1.794733 |
| 12            | 6             | 0           | -6.338133               | 0.333548  | -0.483459 |
| 13            | 8             | 0           | 4.126572                | 0.393254  | -0.029382 |
| 14            | 6             | 0           | 4.037730                | 1.441250  | 0.943380  |
| 15            | 8             | 0           | 1.534792                | 1.062097  | -0.994474 |
| 16            | 16            | 0           | 0.470039                | 1.777541  | -0.203793 |
| 17            | 8             | 0           | -0.870914               | 1.500597  | -0.718577 |
| 18            | 8             | 0           | 0.548265                | 1.127228  | 1.280234  |
| 19            | 8             | 0           | 0.818706                | 3.175280  | 0.019981  |
| 20            | 1             | 0           | 0.098873                | 0.255821  | 1.277327  |
| 21            | 1             | 0           | 0.805560                | -2.228530 | 1.675895  |
| 22            | 1             | 0           | 1.748096                | -2.066456 | -2.646095 |
| 23            | 1             | 0           | 2.637951                | -2.832382 | 0.316599  |
| 24            | 1             | 0           | -2.055229               | -0.763052 | -0.979674 |
| 25            | 1             | 0           | -3.056537               | -2.027053 | 1.624482  |
| 26            | 1             | 0           | -2.622659               | -0.332259 | 1.415106  |
| 27            | 1             | 0           | -5.019655               | -1.846377 | 0.207089  |
| 28            | 1             | 0           | -6.342273               | 0.817479  | -1.470019 |
| 29            | 1             | 0           | -6.816164               | -0.647318 | -0.578857 |
| 30            | 1             | 0           | -6.963392               | 0.960627  | 0.167326  |
| 31            | 1             | 0           | -4.821830               | 2.246211  | 0.787636  |
| 32            | 1             | 0           | -3.234865               | 1.460190  | 0.625282  |
| 33            | 1             | 0           | -4.117267               | 2.011160  | -0.805226 |
| 34            | 1             | 0           | -0.935276               | -1.978615 | 2.292057  |
| 35            | 1             | 0           | 4.669762                | -0.321614 | 0.335909  |
| 36            | 1             | 0           | 3.588712                | 1.077210  | 1.874430  |
| 37            | 1             | 0           | 5.031923                | 1.849439  | 1.144456  |
| 38            | 1             | 0           | 3.402388                | 2.219796  | 0.517269  |
| 39            | 1             | 0           | -2.443052               | -2.459693 | -0.784957 |

### 2f-aS

| Center Number | Atomic Number | Atomic Type | Coordinates (Angstroms) |           |           |
|---------------|---------------|-------------|-------------------------|-----------|-----------|
|               |               |             | X                       | Y         | Z         |
| 1             | 6             | 0           | -3.836223               | -0.324730 | -0.222137 |
| 2             | 6             | 0           | -2.407636               | 0.042506  | 0.040523  |
| 3             | 6             | 0           | -2.066951               | 1.471599  | -0.257024 |
| 4             | 6             | 0           | -1.527571               | -0.858520 | 0.498674  |
| 5             | 6             | 0           | -0.074813               | -0.610403 | 0.772081  |
| 6             | 6             | 0           | 0.798263                | -0.830410 | -0.470688 |
| 7             | 6             | 0           | 2.237710                | -0.458715 | -0.232636 |
| 8             | 6             | 0           | 3.237681                | -1.349925 | -0.219668 |
| 9             | 6             | 0           | 2.487958                | 0.931489  | 0.007509  |
| 10            | 6             | 0           | 2.639448                | 2.118134  | 0.201992  |
| 11            | 1             | 0           | 0.397130                | -0.217204 | -1.291438 |
| 12            | 1             | 0           | 0.740375                | -1.878411 | -0.791613 |

|    |   |   |           |           |           |
|----|---|---|-----------|-----------|-----------|
| 13 | 1 | 0 | 0.279392  | -1.276911 | 1.570042  |
| 14 | 1 | 0 | 0.083827  | 0.413577  | 1.137627  |
| 15 | 1 | 0 | -1.881952 | -1.880568 | 0.654396  |
| 16 | 1 | 0 | -4.040456 | -1.375394 | 0.009355  |
| 17 | 1 | 0 | -4.516641 | 0.298469  | 0.374813  |
| 18 | 1 | 0 | -4.100764 | -0.145135 | -1.273425 |
| 19 | 1 | 0 | -1.015493 | 1.717010  | -0.076377 |
| 20 | 1 | 0 | -2.289544 | 1.702423  | -1.307928 |
| 21 | 1 | 0 | -2.687887 | 2.151579  | 0.342382  |
| 22 | 1 | 0 | 2.797158  | 3.161557  | 0.374119  |
| 23 | 1 | 0 | 4.265820  | -1.053283 | -0.030839 |
| 24 | 1 | 0 | 3.041839  | -2.403864 | -0.402873 |

**(E)-RCf-Sz**

| Center<br>Number | Atomic<br>Number | Atomic<br>Type | Coordinates (Angstroms) |           |           |
|------------------|------------------|----------------|-------------------------|-----------|-----------|
|                  |                  |                | X                       | Y         | Z         |
| 1                | 6                | 0              | 2.117564                | -2.419866 | -1.839627 |
| 2                | 6                | 0              | 1.271182                | -1.451824 | -1.030977 |
| 3                | 6                | 0              | 1.516854                | -1.611745 | 0.409491  |
| 4                | 6                | 0              | 1.697692                | -1.762317 | 1.596235  |
| 5                | 6                | 0              | 1.428299                | -0.002128 | -1.498177 |
| 6                | 6                | 0              | 2.861743                | 0.530988  | -1.564362 |
| 7                | 6                | 0              | 3.565670                | 0.570097  | -0.239366 |
| 8                | 6                | 0              | 3.415032                | 1.507100  | 0.706969  |
| 9                | 6                | 0              | 4.102040                | 1.386420  | 2.032509  |
| 10               | 6                | 0              | 2.527809                | 2.706176  | 0.565487  |
| 11               | 8                | 0              | -1.722013               | 0.778790  | -1.327529 |
| 12               | 29               | 0              | -1.468978               | -0.771865 | -0.131597 |
| 13               | 8                | 0              | -1.719235               | -2.326239 | 1.119126  |
| 14               | 6                | 0              | -1.738962               | -2.009087 | 2.520753  |
| 15               | 16               | 0              | -2.354377               | 1.667118  | -0.230000 |
| 16               | 8                | 0              | -3.700695               | 2.102144  | -0.617925 |
| 17               | 8                | 0              | -1.446303               | 2.760389  | 0.140646  |
| 18               | 8                | 0              | -2.419151               | 0.606345  | 0.900173  |
| 19               | 8                | 0              | -0.137259               | -1.778363 | -1.283951 |
| 20               | 1                | 0              | 0.975587                | 0.045220  | -2.498361 |
| 21               | 1                | 0              | 1.887960                | -3.455247 | -1.566898 |
| 22               | 1                | 0              | 1.923412                | -2.275100 | -2.907952 |
| 23               | 1                | 0              | 1.871698                | -1.887901 | 2.644375  |
| 24               | 1                | 0              | -0.265441               | -2.726565 | -1.117344 |
| 25               | 1                | 0              | 0.831847                | 0.648163  | -0.842161 |
| 26               | 1                | 0              | 3.443253                | -0.064796 | -2.279696 |
| 27               | 1                | 0              | 2.799906                | 1.538498  | -1.996679 |
| 28               | 1                | 0              | 4.215464                | -0.278521 | -0.009594 |
| 29               | 1                | 0              | 3.363956                | 1.353400  | 2.847263  |
| 30               | 1                | 0              | 4.718902                | 0.482981  | 2.094280  |
| 31               | 1                | 0              | 4.740389                | 2.258167  | 2.233046  |
| 32               | 1                | 0              | 3.061365                | 3.621258  | 0.855719  |
| 33               | 1                | 0              | 2.139392                | 2.840730  | -0.448910 |
| 34               | 1                | 0              | 1.665015                | 2.624172  | 1.242529  |
| 35               | 1                | 0              | 3.180656                | -2.249271 | -1.644843 |
| 36               | 1                | 0              | -2.537680               | -2.790448 | 0.890949  |
| 37               | 1                | 0              | -2.608967               | -1.397208 | 2.772955  |
| 38               | 1                | 0              | -1.745012               | -2.934214 | 3.102420  |
| 39               | 1                | 0              | -0.823591               | -1.450555 | 2.727300  |

**(E)-TS1f-Sz**

| Center<br>Number | Atomic<br>Number | Atomic<br>Type | Coordinates (Angstroms) |           |           |
|------------------|------------------|----------------|-------------------------|-----------|-----------|
|                  |                  |                | X                       | Y         | Z         |
| 1                | 6                | 0              | 1.257305                | -2.722770 | -1.592664 |
| 2                | 6                | 0              | 0.969423                | -1.792116 | -0.497549 |
| 3                | 6                | 0              | 1.422991                | -0.408867 | -0.512829 |
| 4                | 6                | 0              | 2.723164                | -0.058164 | -1.243402 |

|    |    |   |           |           |           |
|----|----|---|-----------|-----------|-----------|
| 5  | 6  | 0 | 3.938791  | -0.451100 | -0.457591 |
| 6  | 6  | 0 | 4.513698  | 0.277953  | 0.509986  |
| 7  | 6  | 0 | 4.020635  | 1.618779  | 0.961250  |
| 8  | 6  | 0 | 0.202947  | -2.223870 | 0.578672  |
| 9  | 6  | 0 | -0.472829 | -2.590157 | 1.522446  |
| 10 | 6  | 0 | 5.728233  | -0.216006 | 1.234464  |
| 11 | 8  | 0 | -1.144636 | 1.245699  | -1.398384 |
| 12 | 16 | 0 | -1.122944 | 2.200714  | -0.188979 |
| 13 | 8  | 0 | 0.261061  | 2.568890  | 0.162090  |
| 14 | 29 | 0 | -2.020138 | -0.278160 | -0.312665 |
| 15 | 8  | 0 | -2.017922 | -1.527077 | -1.670334 |
| 16 | 8  | 0 | -1.730604 | 1.278248  | 0.888919  |
| 17 | 8  | 0 | -1.992374 | 3.364976  | -0.426799 |
| 18 | 1  | 0 | 0.574501  | 0.070958  | -1.062612 |
| 19 | 1  | 0 | 0.622594  | -3.608347 | -1.573347 |
| 20 | 1  | 0 | 1.205298  | -2.208428 | -2.558171 |
| 21 | 1  | 0 | -1.058608 | -2.920586 | 2.356984  |
| 22 | 1  | 0 | -2.118760 | -2.389536 | -1.250990 |
| 23 | 1  | 0 | 1.376829  | 0.027490  | 0.492126  |
| 24 | 1  | 0 | 2.737238  | -0.526190 | -2.234297 |
| 25 | 1  | 0 | 2.697168  | 1.023384  | -1.418933 |
| 26 | 1  | 0 | 4.367095  | -1.430222 | -0.685187 |
| 27 | 1  | 0 | 5.536416  | -0.290307 | 2.313734  |
| 28 | 1  | 0 | 6.054128  | -1.196888 | 0.872776  |
| 29 | 1  | 0 | 6.562593  | 0.489799  | 1.119981  |
| 30 | 1  | 0 | 4.801948  | 2.380357  | 0.831620  |
| 31 | 1  | 0 | 3.119173  | 1.956332  | 0.440740  |
| 32 | 1  | 0 | 3.796033  | 1.592903  | 2.036564  |
| 33 | 1  | 0 | 2.308405  | -3.033553 | -1.470828 |
| 34 | 8  | 0 | -3.095255 | -1.437750 | 0.998907  |
| 35 | 1  | 0 | -3.939591 | -1.661957 | 0.582785  |
| 36 | 6  | 0 | -3.336870 | -0.927259 | 2.315398  |
| 37 | 1  | 0 | -3.967049 | -0.033641 | 2.286448  |
| 38 | 1  | 0 | -3.807860 | -1.699361 | 2.930022  |
| 39 | 1  | 0 | -2.363547 | -0.669421 | 2.737245  |

-----

*(E)*-INTf-S<sub>z</sub>

| Center<br>Number | Atomic<br>Number | Atomic<br>Type | Coordinates (Angstroms) |           |           |
|------------------|------------------|----------------|-------------------------|-----------|-----------|
|                  |                  |                | X                       | Y         | Z         |
| 1                | 6                | 0              | 1.347547                | -2.663364 | -1.463182 |
| 2                | 6                | 0              | 1.050989                | -1.738609 | -0.365561 |
| 3                | 6                | 0              | 1.499565                | -0.354548 | -0.371008 |
| 4                | 6                | 0              | 2.761517                | 0.023545  | -1.150801 |
| 5                | 6                | 0              | 4.018476                | -0.413485 | -0.460268 |
| 6                | 6                | 0              | 4.700716                | 0.291073  | 0.454328  |
| 7                | 6                | 0              | 4.302806                | 1.649459  | 0.944103  |
| 8                | 6                | 0              | 0.292193                | -2.180353 | 0.714810  |
| 9                | 6                | 0              | -0.369883               | -2.552793 | 1.664895  |
| 10               | 6                | 0              | 5.952932                | -0.249666 | 1.073025  |
| 11               | 8                | 0              | -1.106148               | 1.172814  | -1.346873 |
| 12               | 16               | 0              | -1.187611               | 2.170021  | -0.173529 |
| 13               | 8                | 0              | 0.160961                | 2.586313  | 0.251040  |
| 14               | 29               | 0              | -1.995093               | -0.343630 | -0.261103 |
| 15               | 8                | 0              | -1.832041               | -1.653922 | -1.551658 |
| 16               | 8                | 0              | -1.841783               | 1.266890  | 0.893720  |
| 17               | 8                | 0              | -2.069762               | 3.299475  | -0.509859 |
| 18               | 1                | 0              | 0.623690                | 0.129217  | -0.874395 |
| 19               | 1                | 0              | 0.738461                | -3.566065 | -1.435361 |
| 20               | 1                | 0              | 1.267172                | -2.151636 | -2.428194 |
| 21               | 1                | 0              | -0.949693               | -2.881170 | 2.503890  |
| 22               | 1                | 0              | -1.751423               | -2.501790 | -1.100409 |
| 23               | 1                | 0              | 1.491454                | 0.062330  | 0.643796  |
| 24               | 1                | 0              | 2.717693                | -0.393532 | -2.163520 |
| 25               | 1                | 0              | 2.731878                | 1.112533  | -1.270461 |
| 26               | 1                | 0              | 4.390485                | -1.407223 | -0.721328 |
| 27               | 1                | 0              | 5.853790                | -0.313935 | 2.165098  |
| 28               | 1                | 0              | 6.207473                | -1.243066 | 0.689383  |
| 29               | 1                | 0              | 6.801082                | 0.422434  | 0.882168  |
| 30               | 1                | 0              | 5.098307                | 2.380264  | 0.744551  |

|    |   |   |           |           |           |
|----|---|---|-----------|-----------|-----------|
| 31 | 1 | 0 | 3.374694  | 2.021891  | 0.501576  |
| 32 | 1 | 0 | 4.171380  | 1.632112  | 2.034356  |
| 33 | 1 | 0 | 2.409176  | -2.940403 | -1.356197 |
| 34 | 8 | 0 | -3.132629 | -1.406126 | 1.087281  |
| 35 | 1 | 0 | -3.403687 | -2.229192 | 0.656623  |
| 36 | 6 | 0 | -4.313627 | -0.714401 | 1.521631  |
| 37 | 1 | 0 | -4.955132 | -0.463766 | 0.671214  |
| 38 | 1 | 0 | -4.863728 | -1.331698 | 2.236230  |
| 39 | 1 | 0 | -3.981779 | 0.202933  | 2.008375  |

(E)-TS2f-Sz

| Center<br>Number | Atomic<br>Number | Atomic<br>Type | Coordinates (Angstroms) |           |           |
|------------------|------------------|----------------|-------------------------|-----------|-----------|
|                  |                  |                | X                       | Y         | Z         |
| 1                | 6                | 0              | 0.918660                | 2.753734  | 1.328001  |
| 2                | 6                | 0              | 0.863672                | 1.855585  | 0.147002  |
| 3                | 6                | 0              | 1.538558                | 0.635683  | 0.095002  |
| 4                | 6                | 0              | 2.673805                | 0.259650  | 1.025734  |
| 5                | 6                | 0              | 3.997724                | 0.643630  | 0.429925  |
| 6                | 6                | 0              | 4.756782                | -0.125000 | -0.364213 |
| 7                | 6                | 0              | 4.397508                | -1.516481 | -0.786999 |
| 8                | 6                | 0              | -0.021331               | 2.178263  | -0.906476 |
| 9                | 6                | 0              | -0.803464               | 2.445296  | -1.794531 |
| 10               | 6                | 0              | 6.061149                | 0.373503  | -0.906428 |
| 11               | 8                | 0              | -0.470542               | -0.791111 | 1.153073  |
| 12               | 16               | 0              | -0.691788               | -2.045658 | 0.227018  |
| 13               | 8                | 0              | 0.536119                | -2.326067 | -0.526783 |
| 14               | 29               | 0              | -2.107391               | 0.239730  | 0.231259  |
| 15               | 8                | 0              | -2.292261               | 1.669484  | 1.371283  |
| 16               | 8                | 0              | -1.795224               | -1.496770 | -0.683486 |
| 17               | 8                | 0              | -1.175790               | -3.159190 | 1.048705  |
| 18               | 1                | 0              | 0.531734                | 0.060093  | 0.591154  |
| 19               | 1                | 0              | 0.236355                | 3.599137  | 1.234652  |
| 20               | 1                | 0              | 0.664787                | 2.182988  | 2.229767  |
| 21               | 1                | 0              | -1.486623               | 2.680693  | -2.584344 |
| 22               | 1                | 0              | -2.157763               | 2.467053  | 0.845234  |
| 23               | 1                | 0              | 1.563814                | 0.156398  | -0.889167 |
| 24               | 1                | 0              | 2.537548                | 0.739280  | 2.001686  |
| 25               | 1                | 0              | 2.616918                | -0.821509 | 1.201758  |
| 26               | 1                | 0              | 4.336472                | 1.660896  | 0.641734  |
| 27               | 1                | 0              | 6.055377                | 0.366866  | -2.005149 |
| 28               | 1                | 0              | 6.287819                | 1.389782  | -0.567706 |
| 29               | 1                | 0              | 6.885856                | -0.285095 | -0.600701 |
| 30               | 1                | 0              | 5.152202                | -2.234001 | -0.436742 |
| 31               | 1                | 0              | 3.416606                | -1.845735 | -0.431541 |
| 32               | 1                | 0              | 4.396862                | -1.585737 | -1.883295 |
| 33               | 1                | 0              | 1.944945                | 3.118232  | 1.459458  |
| 34               | 8                | 0              | -3.621797               | 0.826108  | -1.015309 |
| 35               | 1                | 0              | -4.008139               | 1.581308  | -0.547239 |
| 36               | 6                | 0              | -4.643756               | -0.165396 | -1.201077 |
| 37               | 1                | 0              | -5.017016               | -0.528365 | -0.238052 |
| 38               | 1                | 0              | -5.464878               | 0.256462  | -1.785948 |
| 39               | 1                | 0              | -4.189828               | -0.990841 | -1.749880 |

(E)-PCf-Sz

| Center<br>Number | Atomic<br>Number | Atomic<br>Type | Coordinates (Angstroms) |           |           |
|------------------|------------------|----------------|-------------------------|-----------|-----------|
|                  |                  |                | X                       | Y         | Z         |
| 1                | 6                | 0              | 0.518326                | -2.560501 | -1.482698 |
| 2                | 6                | 0              | 0.846390                | -1.729508 | -0.274635 |
| 3                | 6                | 0              | -0.030165               | -1.878235 | 0.838526  |
| 4                | 6                | 0              | -0.851364               | -1.987002 | 1.740752  |
| 5                | 6                | 0              | 1.864287                | -0.847526 | -0.143421 |
| 6                | 6                | 0              | 2.901262                | -0.490396 | -1.153750 |

|    |    |   |           |           |           |
|----|----|---|-----------|-----------|-----------|
| 7  | 6  | 0 | 4.282040  | -0.714291 | -0.592615 |
| 8  | 6  | 0 | 4.998342  | 0.160894  | 0.126497  |
| 9  | 6  | 0 | 6.353806  | -0.200233 | 0.653171  |
| 10 | 6  | 0 | 4.540533  | 1.542118  | 0.479774  |
| 11 | 8  | 0 | -0.651596 | 0.948896  | -1.346751 |
| 12 | 29 | 0 | -2.216083 | -0.666517 | 0.499040  |
| 13 | 8  | 0 | -4.076605 | 0.293780  | 0.341374  |
| 14 | 6  | 0 | -4.214567 | 1.008201  | -0.894054 |
| 15 | 16 | 0 | -0.655776 | 1.888089  | -0.020195 |
| 16 | 8  | 0 | -1.446258 | 3.041813  | -0.435824 |
| 17 | 8  | 0 | 0.739159  | 2.146771  | 0.333620  |
| 18 | 8  | 0 | -1.346903 | 1.056292  | 1.027411  |
| 19 | 8  | 0 | -2.986298 | -2.113943 | -0.323809 |
| 20 | 1  | 0 | -0.016180 | 0.216866  | -1.209003 |
| 21 | 1  | 0 | 0.556511  | -3.627778 | -1.236798 |
| 22 | 1  | 0 | -0.503506 | -2.345621 | -1.821457 |
| 23 | 1  | 0 | -1.413531 | -2.205303 | 2.627296  |
| 24 | 1  | 0 | -2.403667 | -2.872751 | -0.197600 |
| 25 | 1  | 0 | 1.950024  | -0.320966 | 0.809532  |
| 26 | 1  | 0 | 2.769368  | -1.061738 | -2.078577 |
| 27 | 1  | 0 | 2.755080  | 0.569157  | -1.414549 |
| 28 | 1  | 0 | 4.701877  | -1.708014 | -0.760230 |
| 29 | 1  | 0 | 6.380369  | -0.117906 | 1.748531  |
| 30 | 1  | 0 | 6.646073  | -1.218503 | 0.376327  |
| 31 | 1  | 0 | 7.116640  | 0.494368  | 0.275170  |
| 32 | 1  | 0 | 5.262113  | 2.289975  | 0.123677  |
| 33 | 1  | 0 | 3.554954  | 1.795307  | 0.078938  |
| 34 | 1  | 0 | 4.496676  | 1.656073  | 1.571654  |
| 35 | 1  | 0 | 1.206143  | -2.370643 | -2.309496 |
| 36 | 1  | 0 | -4.683282 | -0.460626 | 0.315837  |
| 37 | 1  | 0 | -3.973470 | 0.364192  | -1.747897 |
| 38 | 1  | 0 | -5.234772 | 1.388939  | -0.995412 |
| 39 | 1  | 0 | -3.513940 | 1.844563  | -0.858442 |

**(E)-2f-Sz**

| Center<br>Number | Atomic<br>Number | Atomic<br>Type | Coordinates (Angstroms) |           |           |
|------------------|------------------|----------------|-------------------------|-----------|-----------|
|                  |                  |                | X                       | Y         | Z         |
| 1                | 6                | 0              | 2.598454                | -1.607247 | -0.155028 |
| 2                | 6                | 0              | 2.036683                | -0.231334 | 0.065902  |
| 3                | 6                | 0              | 0.784647                | 0.058089  | 0.467674  |
| 4                | 6                | 0              | -0.331070               | -0.897129 | 0.754687  |
| 5                | 6                | 0              | -1.437267               | -0.719513 | -0.251540 |
| 6                | 6                | 0              | -2.513279               | 0.070276  | -0.134450 |
| 7                | 6                | 0              | -2.819476               | 0.915270  | 1.063560  |
| 8                | 6                | 0              | 2.945159                | 0.846927  | -0.186716 |
| 9                | 6                | 0              | 3.739320                | 1.734784  | -0.412558 |
| 10               | 6                | 0              | -3.519882               | 0.173337  | -1.239759 |
| 11               | 1                | 0              | 3.453616                | -1.786100 | 0.507514  |
| 12               | 1                | 0              | 1.858389                | -2.391155 | 0.021898  |
| 13               | 1                | 0              | 4.431107                | 2.526459  | -0.606459 |
| 14               | 1                | 0              | 0.518709                | 1.112903  | 0.569184  |
| 15               | 1                | 0              | 0.022351                | -1.934172 | 0.737745  |
| 16               | 1                | 0              | -0.702617               | -0.711391 | 1.771792  |
| 17               | 1                | 0              | -1.301516               | -1.260648 | -1.190940 |
| 18               | 1                | 0              | -3.612003               | 1.210941  | -1.589326 |
| 19               | 1                | 0              | -3.257874               | -0.456482 | -2.096230 |
| 20               | 1                | 0              | -4.518302               | -0.120477 | -0.887398 |
| 21               | 1                | 0              | -3.806094               | 0.661347  | 1.474413  |
| 22               | 1                | 0              | -2.080116               | 0.823632  | 1.864328  |
| 23               | 1                | 0              | -2.872542               | 1.974055  | 0.775284  |
| 24               | 1                | 0              | 2.967163                | -1.709674 | -1.182418 |

**(Z)-RCf-Sz**

| Center<br>Number | Atomic<br>Number | Atomic<br>Type | Coordinates (Angstroms) |           |           |
|------------------|------------------|----------------|-------------------------|-----------|-----------|
|                  |                  |                | X                       | Y         | Z         |
| 1                | 6                | 0              | -0.987052               | 3.223512  | -2.066953 |
| 2                | 6                | 0              | -0.636268               | 2.278358  | -0.927042 |
| 3                | 6                | 0              | -0.525456               | 3.013933  | 0.337900  |
| 4                | 6                | 0              | -0.437323               | 3.630080  | 1.374469  |
| 5                | 6                | 0              | -1.641438               | 1.129782  | -0.846341 |
| 6                | 6                | 0              | -1.695241               | 0.333041  | 0.456747  |
| 7                | 6                | 0              | -2.490889               | -0.922533 | 0.265992  |
| 8                | 6                | 0              | -3.794046               | -1.099354 | 0.524625  |
| 9                | 6                | 0              | -4.470141               | -2.405527 | 0.235090  |
| 10               | 6                | 0              | -4.695493               | -0.048832 | 1.098191  |
| 11               | 8                | 0              | 0.659459                | 1.686551  | -1.254943 |
| 12               | 29               | 0              | 1.513918                | 0.236094  | -0.152646 |
| 13               | 8                | 0              | 2.477794                | 1.557899  | 0.997897  |
| 14               | 6                | 0              | 3.183896                | 1.078616  | 2.154275  |
| 15               | 8                | 0              | 2.147329                | -1.424063 | 0.680035  |
| 16               | 16               | 0              | 1.390191                | -2.358072 | -0.299897 |
| 17               | 8                | 0              | 2.329495                | -3.186313 | -1.064928 |
| 18               | 8                | 0              | 0.761900                | -1.265364 | -1.197911 |
| 19               | 8                | 0              | 0.354604                | -3.119131 | 0.409733  |
| 20               | 1                | 0              | -1.423319               | 0.466854  | -1.695631 |
| 21               | 1                | 0              | -0.216090               | 3.992174  | -2.187929 |
| 22               | 1                | 0              | -1.076505               | 2.653772  | -2.997962 |
| 23               | 1                | 0              | -0.363950               | 4.178271  | 2.289908  |
| 24               | 1                | 0              | 1.296109                | 2.405487  | -1.395577 |
| 25               | 1                | 0              | -1.939448               | 3.720984  | -1.860588 |
| 26               | 1                | 0              | -2.640295               | 1.549226  | -1.029105 |
| 27               | 1                | 0              | -0.684420               | 0.065655  | 0.805037  |
| 28               | 1                | 0              | -2.119092               | 0.965065  | 1.247562  |
| 29               | 1                | 0              | -1.941358               | -1.752789 | -0.186689 |
| 30               | 1                | 0              | -5.299051               | -2.268104 | -0.473354 |
| 31               | 1                | 0              | -3.777954               | -3.143713 | -0.183620 |
| 32               | 1                | 0              | -4.914374               | -2.827324 | 1.147606  |
| 33               | 1                | 0              | -4.187533               | 0.898061  | 1.303493  |
| 34               | 1                | 0              | -5.524633               | 0.156150  | 0.406799  |
| 35               | 1                | 0              | -5.156503               | -0.400867 | 2.031362  |
| 36               | 1                | 0              | 3.080366                | 2.085603  | 0.453690  |
| 37               | 1                | 0              | 4.015931                | 0.429974  | 1.867194  |
| 38               | 1                | 0              | 3.551217                | 1.930686  | 2.731336  |
| 39               | 1                | 0              | 2.466277                | 0.514172  | 2.750769  |

**(Z)-TS1f-Sz**

| Center<br>Number | Atomic<br>Number | Atomic<br>Type | Coordinates (Angstroms) |           |           |
|------------------|------------------|----------------|-------------------------|-----------|-----------|
|                  |                  |                | X                       | Y         | Z         |
| 1                | 6                | 0              | -0.150887               | 3.624460  | -0.173436 |
| 2                | 6                | 0              | -0.474159               | 2.286294  | 0.321924  |
| 3                | 6                | 0              | 0.319354                | 1.713132  | 1.311195  |
| 4                | 6                | 0              | 1.008182                | 1.184351  | 2.163825  |
| 5                | 6                | 0              | -1.628943               | 1.553073  | -0.197279 |
| 6                | 6                | 0              | -2.301125               | 0.532717  | 0.721506  |
| 7                | 6                | 0              | -3.238610               | -0.340332 | -0.051727 |
| 8                | 6                | 0              | -4.573440               | -0.243144 | -0.120161 |
| 9                | 6                | 0              | -5.373783               | -1.200820 | -0.949925 |
| 10               | 6                | 0              | -5.389772               | 0.789535  | 0.594339  |
| 11               | 8                | 0              | 1.252639                | 1.342386  | -1.880402 |
| 12               | 29               | 0              | 1.817702                | 0.063413  | -0.667317 |
| 13               | 8                | 0              | 3.615216                | 0.977253  | -0.307507 |
| 14               | 6                | 0              | 4.448612                | 0.446558  | 0.730889  |
| 15               | 8                | 0              | 2.065582                | -1.487531 | 0.548952  |
| 16               | 16               | 0              | 0.714226                | -2.156767 | 0.213924  |
| 17               | 8                | 0              | 0.928584                | -3.480794 | -0.395450 |
| 18               | 8                | 0              | 0.171281                | -1.158653 | -0.822325 |
| 19               | 8                | 0              | -0.147163               | -2.199345 | 1.410274  |
| 20               | 1                | 0              | -1.149575               | 1.020252  | -1.047525 |
| 21               | 1                | 0              | -0.493648               | 3.759746  | -1.202479 |
| 22               | 1                | 0              | -0.749941               | 4.310018  | 0.451040  |
| 23               | 1                | 0              | 1.607841                | 0.716028  | 2.919399  |

|    |   |   |           |           |           |
|----|---|---|-----------|-----------|-----------|
| 24 | 1 | 0 | 1.847057  | 2.097101  | -1.798056 |
| 25 | 1 | 0 | 0.900873  | 3.885349  | -0.044371 |
| 26 | 1 | 0 | -2.338602 | 2.251098  | -0.659839 |
| 27 | 1 | 0 | -1.528811 | -0.093247 | 1.186126  |
| 28 | 1 | 0 | -2.809380 | 1.069741  | 1.530905  |
| 29 | 1 | 0 | -2.750695 | -1.122836 | -0.640688 |
| 30 | 1 | 0 | -5.956150 | -0.665480 | -1.712597 |
| 31 | 1 | 0 | -4.740362 | -1.938284 | -1.453815 |
| 32 | 1 | 0 | -6.103610 | -1.739065 | -0.329298 |
| 33 | 1 | 0 | -4.789635 | 1.503680  | 1.165376  |
| 34 | 1 | 0 | -5.996093 | 1.356206  | -0.125322 |
| 35 | 1 | 0 | -6.100409 | 0.310774  | 1.281964  |
| 36 | 1 | 0 | 4.106690  | 0.967293  | -1.140944 |
| 37 | 1 | 0 | 4.742802  | -0.584695 | 0.516033  |
| 38 | 1 | 0 | 5.336397  | 1.073926  | 0.846695  |
| 39 | 1 | 0 | 3.862613  | 0.470224  | 1.651577  |

(Z)-INTf-Sz

| Center Number | Atomic Number | Atomic Type | Coordinates (Angstroms) |           |           |
|---------------|---------------|-------------|-------------------------|-----------|-----------|
|               |               |             | X                       | Y         | Z         |
| 1             | 6             | 0           | -0.212787               | -2.333750 | 1.860593  |
| 2             | 6             | 0           | -0.714996               | -1.771095 | 0.620627  |
| 3             | 6             | 0           | -0.045127               | -2.077419 | -0.562496 |
| 4             | 6             | 0           | 0.569243                | -2.323460 | -1.583431 |
| 5             | 6             | 0           | -1.833130               | -0.828827 | 0.604453  |
| 6             | 6             | 0           | -2.460542               | -0.491644 | -0.744024 |
| 7             | 6             | 0           | -3.604216               | 0.463192  | -0.579234 |
| 8             | 6             | 0           | -4.890156               | 0.134897  | -0.391087 |
| 9             | 6             | 0           | -5.940744               | 1.187935  | -0.213949 |
| 10            | 6             | 0           | -5.403691               | -1.270838 | -0.327218 |
| 11            | 8             | 0           | 2.663329                | -1.341168 | 1.613310  |
| 12            | 29            | 0           | 2.141192                | -0.198433 | 0.245431  |
| 13            | 8             | 0           | 3.268448                | -0.958590 | -1.303301 |
| 14            | 6             | 0           | 4.300080                | -0.047702 | -1.716731 |
| 15            | 8             | 0           | 1.387461                | 1.235514  | -0.905738 |
| 16            | 16            | 0           | 0.758193                | 2.037529  | 0.253828  |
| 17            | 8             | 0           | 1.441424                | 3.331645  | 0.420059  |
| 18            | 8             | 0           | 1.073109                | 1.093380  | 1.426764  |
| 19            | 8             | 0           | -0.698315               | 2.170722  | 0.064920  |
| 20            | 1             | 0           | -1.391352               | 0.089413  | 1.051491  |
| 21            | 1             | 0           | 0.829770                | -1.930325 | 1.970559  |
| 22            | 1             | 0           | -0.833787               | -2.088697 | 2.722396  |
| 23            | 1             | 0           | 1.105839                | -2.538855 | -2.485628 |
| 24            | 1             | 0           | 2.900113                | -2.192542 | 1.225728  |
| 25            | 1             | 0           | -0.057491               | -3.415091 | 1.759964  |
| 26            | 1             | 0           | -2.571727               | -1.157202 | 1.351054  |
| 27            | 1             | 0           | -1.691196               | -0.047146 | -1.389533 |
| 28            | 1             | 0           | -2.782945               | -1.421813 | -1.229218 |
| 29            | 1             | 0           | -3.340062               | 1.523090  | -0.572623 |
| 30            | 1             | 0           | -6.452256               | 1.070667  | 0.751427  |
| 31            | 1             | 0           | -5.523105               | 2.198888  | -0.262853 |
| 32            | 1             | 0           | -6.718005               | 1.096764  | -0.985339 |
| 33            | 1             | 0           | -4.626390               | -2.027055 | -0.470083 |
| 34            | 1             | 0           | -5.877773               | -1.454842 | 0.646711  |
| 35            | 1             | 0           | -6.185159               | -1.432072 | -1.082222 |
| 36            | 1             | 0           | 3.684706                | -1.789898 | -1.035302 |
| 37            | 1             | 0           | 4.989490                | 0.163624  | -0.892875 |
| 38            | 1             | 0           | 4.846706                | -0.466389 | -2.565443 |
| 39            | 1             | 0           | 3.801711                | 0.873810  | -2.020091 |

(Z)-TS2f-Sz

| Center Number | Atomic Number | Atomic Type | Coordinates (Angstroms) |   |   |
|---------------|---------------|-------------|-------------------------|---|---|
|               |               |             | X                       | Y | Z |

|    |    |   |           |           |           |
|----|----|---|-----------|-----------|-----------|
| 1  | 6  | 0 | 0.437252  | 2.567782  | 1.942457  |
| 2  | 6  | 0 | 0.739357  | 1.951036  | 0.630603  |
| 3  | 6  | 0 | -0.033215 | 2.352654  | -0.485580 |
| 4  | 6  | 0 | -0.694970 | 2.687460  | -1.445261 |
| 5  | 6  | 0 | 1.632165  | 0.892465  | 0.493525  |
| 6  | 6  | 0 | 2.118577  | 0.407601  | -0.865212 |
| 7  | 6  | 0 | 3.294595  | -0.520175 | -0.755931 |
| 8  | 6  | 0 | 4.558798  | -0.147386 | -0.511887 |
| 9  | 6  | 0 | 5.657169  | -1.158921 | -0.391892 |
| 10 | 6  | 0 | 4.993452  | 1.273686  | -0.322840 |
| 11 | 8  | 0 | -2.600452 | 1.485189  | 1.314447  |
| 12 | 29 | 0 | -2.048081 | 0.136700  | 0.187438  |
| 13 | 8  | 0 | -3.341855 | 0.687742  | -1.312721 |
| 14 | 6  | 0 | -4.303529 | -0.318506 | -1.661962 |
| 15 | 8  | 0 | -1.508290 | -1.563488 | -0.676551 |
| 16 | 16 | 0 | -0.524062 | -2.062053 | 0.388389  |
| 17 | 8  | 0 | -1.124032 | -3.109276 | 1.221827  |
| 18 | 8  | 0 | -0.392919 | -0.749312 | 1.249907  |
| 19 | 8  | 0 | 0.771895  | -2.412355 | -0.197898 |
| 20 | 1  | 0 | 0.659703  | 0.123958  | 0.866683  |
| 21 | 1  | 0 | -0.607597 | 2.339734  | 2.197735  |
| 22 | 1  | 0 | 1.109611  | 2.204949  | 2.722112  |
| 23 | 1  | 0 | -1.277723 | 2.986612  | -2.292090 |
| 24 | 1  | 0 | -2.376884 | 2.318345  | 0.881271  |
| 25 | 1  | 0 | 0.514652  | 3.657679  | 1.858509  |
| 26 | 1  | 0 | 2.314589  | 0.753873  | 1.337924  |
| 27 | 1  | 0 | 1.293593  | -0.089949 | -1.392552 |
| 28 | 1  | 0 | 2.374357  | 1.289598  | -1.470196 |
| 29 | 1  | 0 | 3.082084  | -1.585403 | -0.853768 |
| 30 | 1  | 0 | 6.144037  | -1.090428 | 0.590846  |
| 31 | 1  | 0 | 5.290342  | -2.182202 | -0.523694 |
| 32 | 1  | 0 | 6.443530  | -0.973740 | -1.136680 |
| 33 | 1  | 0 | 4.190794  | 1.999645  | -0.483839 |
| 34 | 1  | 0 | 5.380811  | 1.420234  | 0.695112  |
| 35 | 1  | 0 | 5.820660  | 1.517801  | -1.002998 |
| 36 | 1  | 0 | -3.809763 | 1.438992  | -0.918103 |
| 37 | 1  | 0 | -4.850416 | -0.663015 | -0.778432 |
| 38 | 1  | 0 | -5.001947 | 0.079305  | -2.402628 |
| 39 | 1  | 0 | -3.747758 | -1.151632 | -2.093344 |

(Z)-PCf-Sz

| Center Number | Atomic Number | Atomic Type | Coordinates (Angstroms) |           |           |
|---------------|---------------|-------------|-------------------------|-----------|-----------|
|               |               |             | X                       | Y         | Z         |
| 1             | 6             | 0           | -0.282091               | -2.554072 | 1.774708  |
| 2             | 6             | 0           | -0.807471               | -1.880421 | 0.538334  |
| 3             | 6             | 0           | 0.023135                | -1.935196 | -0.619158 |
| 4             | 6             | 0           | 0.781070                | -1.989038 | -1.577449 |
| 5             | 6             | 0           | -2.014929               | -1.278195 | 0.466536  |
| 6             | 6             | 0           | -2.614540               | -0.636351 | -0.746061 |
| 7             | 6             | 0           | -3.582499               | 0.463145  | -0.410710 |
| 8             | 6             | 0           | -4.892810               | 0.317419  | -0.170451 |
| 9             | 6             | 0           | -5.752548               | 1.497299  | 0.167276  |
| 10            | 6             | 0           | -5.619931               | -0.991670 | -0.203658 |
| 11            | 8             | 0           | 0.472109                | 0.888340  | 1.387513  |
| 12            | 29            | 0           | 2.166367                | -0.617924 | -0.369215 |
| 13            | 8             | 0           | 4.075571                | 0.212762  | -0.583717 |
| 14            | 6             | 0           | 4.319215                | 1.238598  | 0.386982  |
| 15            | 16            | 0           | 0.589239                | 1.889866  | 0.114113  |
| 16            | 8             | 0           | 1.413435                | 2.979754  | 0.622556  |
| 17            | 8             | 0           | -0.770880               | 2.229493  | -0.298646 |
| 18            | 8             | 0           | 1.288115                | 1.070513  | -0.940604 |
| 19            | 8             | 0           | 2.995156                | -1.980316 | 0.535170  |
| 20            | 1             | 0           | -0.228289               | 0.226437  | 1.204268  |
| 21            | 1             | 0           | 0.703838                | -2.154945 | 2.044538  |
| 22            | 1             | 0           | -0.968491               | -2.406392 | 2.613231  |
| 23            | 1             | 0           | 1.322990                | -2.137790 | -2.490513 |
| 24            | 1             | 0           | 2.451546                | -2.774111 | 0.459292  |
| 25            | 1             | 0           | -0.157662               | -3.630660 | 1.608108  |



|    |   |   |           |           |           |
|----|---|---|-----------|-----------|-----------|
| 26 | 1 | 0 | -2.634849 | -1.297022 | 1.365813  |
| 27 | 1 | 0 | -1.812768 | -0.253677 | -1.393973 |
| 28 | 1 | 0 | -3.115029 | -1.424757 | -1.329559 |
| 29 | 1 | 0 | -3.152885 | 1.463128  | -0.331272 |
| 30 | 1 | 0 | -6.232836 | 1.364523  | 1.146532  |
| 31 | 1 | 0 | -5.180735 | 2.430897  | 0.187058  |
| 32 | 1 | 0 | -6.567854 | 1.606462  | -0.561435 |
| 33 | 1 | 0 | -4.982094 | -1.841233 | -0.464156 |
| 34 | 1 | 0 | -6.070689 | -1.198497 | 0.776779  |
| 35 | 1 | 0 | -6.452289 | -0.952976 | -0.919707 |
| 36 | 1 | 0 | 4.581947  | -0.573613 | -0.326837 |
| 37 | 1 | 0 | 3.979257  | 0.925788  | 1.382455  |
| 38 | 1 | 0 | 5.385049  | 1.480411  | 0.419250  |
| 39 | 1 | 0 | 3.751733  | 2.116476  | 0.075275  |

(Z)-2f-Sz

| Center<br>Number | Atomic<br>Number | Atomic<br>Type | Coordinates (Angstroms) |           |           |
|------------------|------------------|----------------|-------------------------|-----------|-----------|
|                  |                  |                | X                       | Y         | Z         |
| 1                | 6                | 0              | 2.848876                | 1.675819  | -0.636341 |
| 2                | 6                | 0              | 2.049054                | 0.527828  | -0.087946 |
| 3                | 6                | 0              | 0.757204                | 0.644395  | 0.266646  |
| 4                | 6                | 0              | -0.126622               | -0.439125 | 0.797960  |
| 5                | 6                | 0              | -1.272089               | -0.699278 | -0.143014 |
| 6                | 6                | 0              | -2.496839               | -0.158493 | -0.090117 |
| 7                | 6                | 0              | -2.951427               | 0.811759  | 0.956349  |
| 8                | 6                | 0              | 2.748142                | -0.714548 | 0.040809  |
| 9                | 6                | 0              | 3.382687                | -1.743417 | 0.134563  |
| 10               | 6                | 0              | -3.534263               | -0.492080 | -1.118918 |
| 11               | 1                | 0              | 3.227800                | 1.447492  | -1.639775 |
| 12               | 1                | 0              | 2.239586                | 2.582918  | -0.693198 |
| 13               | 1                | 0              | 3.933991                | -2.655560 | 0.218872  |
| 14               | 1                | 0              | 3.722222                | 1.882431  | -0.006383 |
| 15               | 1                | 0              | 0.281978                | 1.619314  | 0.132883  |
| 16               | 1                | 0              | 0.455884                | -1.358028 | 0.941801  |
| 17               | 1                | 0              | -0.501058               | -0.143726 | 1.787905  |
| 18               | 1                | 0              | -1.045403               | -1.366872 | -0.977717 |
| 19               | 1                | 0              | -3.875389               | 0.413704  | -1.639044 |
| 20               | 1                | 0              | -3.160441               | -1.198762 | -1.867046 |
| 21               | 1                | 0              | -4.425950               | -0.927964 | -0.647339 |
| 22               | 1                | 0              | -2.183170               | 1.046334  | 1.698554  |
| 23               | 1                | 0              | -3.263671               | 1.754466  | 0.486403  |
| 24               | 1                | 0              | -3.834721               | 0.427099  | 1.484126  |

<sup>1</sup> S. Grimme, S. Ehrlich and L. Goerigk *J. Comp. Chem.* 2011, **32**, 1456-65.

<sup>2</sup> A. D. Becke, "Density-functional thermochemistry. III. The role of exact exchange," *J. Chem. Phys.*, 1993, **98**, 5648-52.

<sup>3</sup> (a) J. P. Perdew, K. Burke, and M. Ernzerhof, *Phys. Rev. Lett.*, 1996, **77**, 3865-68. (b) J. P. Perdew, K. Burke, and M. Ernzerhof, *Phys. Rev. Lett.*, 1997, **78**, 1396.

<sup>4</sup> J. M. Tao, J. P. Perdew, V. N. Staroverov, and G. E. Scuseria, *Phys. Rev. Lett.*, 2003, **91**, 146401.
